# Supplementary material for: Aaptamine Derivatives with Antifungal and Anti-HIV-1 Activities from the South China Sea Sponge Aaptos aaptos
Source: Mar Drugs. 2014 Dec 16;12(12):6003–13. doi: 10.3390/md12126003 (PMC4278215; doi:10.3390/md12126003)
Supplement: Supplementary File 1 [file marinedrugs-12-06003-s001.pdf]

## Supplementary Information

|                   |                                                                                 |
|-------------------|---------------------------------------------------------------------------------|
| <b>Figure S1</b>  | $^1\text{H}$ NMR spectrum of compound <b>1</b> in $\text{DMSO-}d_6$             |
| <b>Figure S2</b>  | $^{13}\text{C}$ NMR spectrum of compound <b>1</b> in $\text{DMSO-}d_6$          |
| <b>Figure S3</b>  | DEPT135 Spectrum of compound <b>1</b> in $\text{DMSO-}d_6$                      |
| <b>Figure S4</b>  | HSQC spectrum of compound <b>1</b> in $\text{DMSO-}d_6$                         |
| <b>Figure S5</b>  | HMBC spectrum of compound <b>1</b> in $\text{DMSO-}d_6$                         |
| <b>Figure S6</b>  | $^1\text{H-}^1\text{H}$ COSY spectrum of compound <b>1</b> in $\text{DMSO-}d_6$ |
| <b>Figure S7</b>  | NOESY spectrum of compound <b>1</b> in $\text{DMSO-}d_6$                        |
| <b>Figure S8</b>  | IR spectrum of compound <b>1</b>                                                |
| <b>Figure S9</b>  | HRESIMS of compound <b>1</b>                                                    |
| <b>Figure S10</b> | UV spectrum of compound <b>1</b>                                                |
| <b>Figure S11</b> | $^1\text{H}$ NMR spectrum of compound <b>2</b> in $\text{DMSO-}d_6$             |
| <b>Figure S12</b> | $^{13}\text{C}$ NMR spectrum of compound <b>2</b> in $\text{DMSO-}d_6$          |
| <b>Figure S13</b> | DEPT135 Spectrum of compound <b>2</b> in $\text{DMSO-}d_6$                      |
| <b>Figure S14</b> | HSQC spectrum of compound <b>2</b> in $\text{DMSO-}d_6$                         |
| <b>Figure S15</b> | HMBC spectrum of compound <b>2</b> in $\text{DMSO-}d_6$                         |
| <b>Figure S16</b> | $^1\text{H-}^1\text{H}$ COSY spectrum of compound <b>2</b> in $\text{DMSO-}d_6$ |
| <b>Figure S17</b> | NOESY spectrum of compound <b>2</b> in $\text{DMSO-}d_6$                        |
| <b>Figure S18</b> | IR spectrum of compound <b>2</b>                                                |
| <b>Figure S19</b> | HRESIMS of compound <b>2</b>                                                    |
| <b>Figure S20</b> | UV spectrum of compound <b>2</b>                                                |
| <b>Figure S21</b> | $^1\text{H}$ NMR spectrum of compound <b>3</b> in $\text{CDCl}_3$               |
| <b>Figure S22</b> | $^{13}\text{C}$ NMR spectrum of compound <b>3</b> in $\text{CDCl}_3$            |
| <b>Figure S23</b> | DEPT135 Spectrum of compound <b>3</b> in $\text{CDCl}_3$                        |
| <b>Figure S24</b> | HSQC spectrum of compound <b>3</b> in $\text{CDCl}_3$                           |
| <b>Figure S25</b> | HMBC spectrum of compound <b>3</b> in $\text{CDCl}_3$                           |
| <b>Figure S26</b> | $^1\text{H-}^1\text{H}$ COSY spectrum of compound <b>3</b> in $\text{CDCl}_3$   |
| <b>Figure S27</b> | NOESY spectrum of compound <b>3</b> in $\text{CDCl}_3$                          |
| <b>Figure S28</b> | IR spectrum of compound <b>3</b>                                                |
| <b>Figure S29</b> | HRESIMS of compound <b>3</b>                                                    |
| <b>Figure S30</b> | UV spectrum of compound <b>3</b>                                                |
| <b>Figure S31</b> | $^1\text{H}$ NMR spectrum of compound <b>4</b> in $\text{CDCl}_3$               |
| <b>Figure S32</b> | $^{13}\text{C}$ NMR spectrum of compound <b>4</b> in $\text{CDCl}_3$            |
| <b>Figure S33</b> | DEPT135 Spectrum of compound <b>4</b> in $\text{CDCl}_3$                        |
| <b>Figure S34</b> | HSQC spectrum of compound <b>4</b> in $\text{CDCl}_3$                           |
| <b>Figure S35</b> | HMBC spectrum of compound <b>4</b> in $\text{CDCl}_3$                           |
| <b>Figure S36</b> | $^1\text{H-}^1\text{H}$ COSY spectrum of compound <b>4</b> in $\text{CDCl}_3$   |
| <b>Figure S37</b> | NOESY spectrum of compound <b>4</b> in $\text{CDCl}_3$                          |
| <b>Figure S38</b> | IR spectrum of compound <b>4</b>                                                |
| <b>Figure S39</b> | HRESIMS of compound <b>4</b>                                                    |
| <b>Figure S40</b> | UV spectrum of compound <b>4</b>                                                |
| <b>Figure S41</b> | $^1\text{H}$ NMR spectrum of compound <b>5</b> in $\text{CDCl}_3$               |

|                   |                                                                                   |
|-------------------|-----------------------------------------------------------------------------------|
| <b>Figure S42</b> | $^{13}\text{C}$ NMR spectrum of compound <b>5</b> in $\text{CDCl}_3$              |
| <b>Figure S43</b> | DEPT135 Spectrum of compound <b>5</b> in $\text{CDCl}_3$                          |
| <b>Figure S44</b> | HSQC spectrum of compound <b>5</b> in $\text{CDCl}_3$                             |
| <b>Figure S45</b> | HMBC spectrum of compound <b>5</b> in $\text{CDCl}_3$                             |
| <b>Figure S46</b> | $^1\text{H}$ - $^1\text{H}$ COSY spectrum of compound <b>5</b> in $\text{CDCl}_3$ |
| <b>Figure S47</b> | NOESY spectrum of compound <b>5</b> in $\text{CDCl}_3$                            |
| <b>Figure S48</b> | IR spectrum of compound <b>5</b>                                                  |
| <b>Figure S49</b> | HRESIMS of compound <b>5</b>                                                      |
| <b>Figure S50</b> | UV spectrum of compound <b>5</b>                                                  |
| <b>Figure S51</b> | $^1\text{H}$ NMR spectrum of compound <b>6</b> in $\text{CDCl}_3$                 |
| <b>Figure S52</b> | $^{13}\text{C}$ NMR spectrum of compound <b>6</b> in $\text{CDCl}_3$              |
| <b>Figure S53</b> | $^1\text{H}$ NMR spectrum of compound <b>7</b> in $\text{CDCl}_3$                 |
| <b>Figure S54</b> | $^{13}\text{C}$ NMR spectrum of compound <b>7</b> in $\text{CDCl}_3$              |
| <b>Figure S55</b> | $^1\text{H}$ NMR spectrum of compound <b>8</b> in $\text{CDCl}_3$                 |
| <b>Figure S56</b> | $^{13}\text{C}$ NMR spectrum of compound <b>8</b> in $\text{CDCl}_3$              |
| <b>Table S1</b>   | NMR spectroscopic data for compounds <b>6–8</b> in $\text{CDCl}_3$                |

**Figure S1.**  $^1\text{H}$  NMR spectrum of compound **1** in  $\text{DMSO}-d_6$ .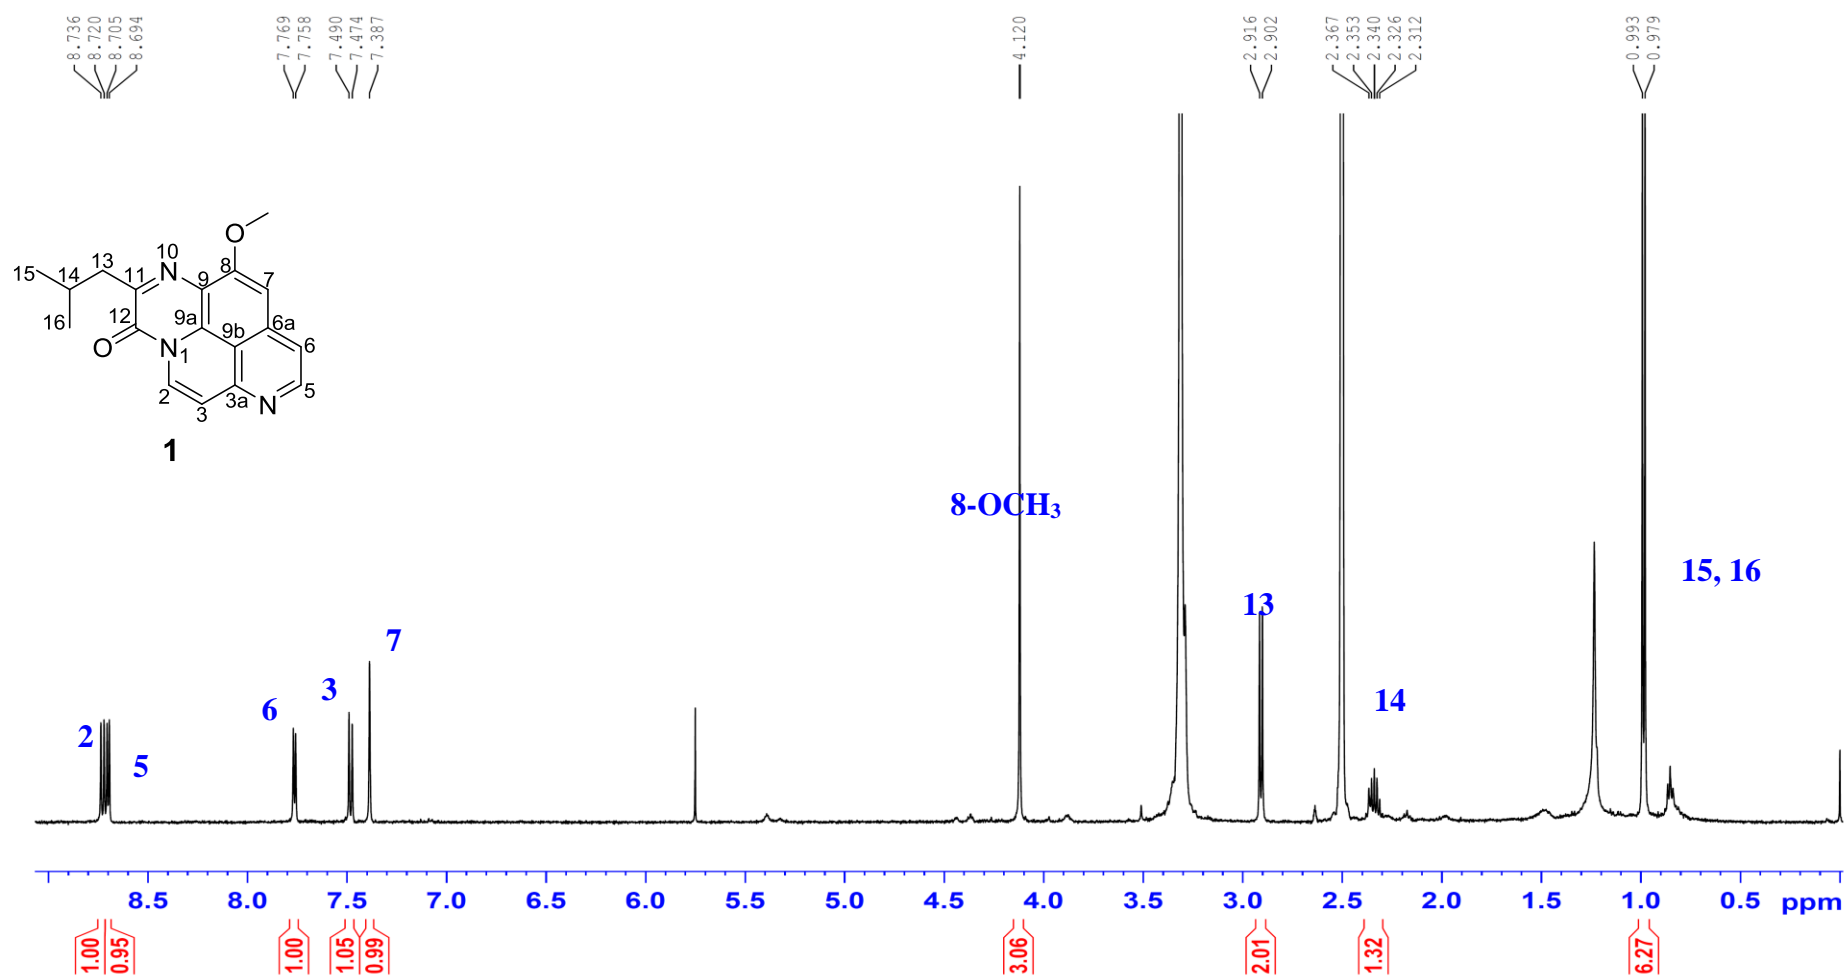

**Figure S2.**  $^{13}\text{C}$  NMR spectrum of compound **1** in  $\text{DMSO-}d_6$ .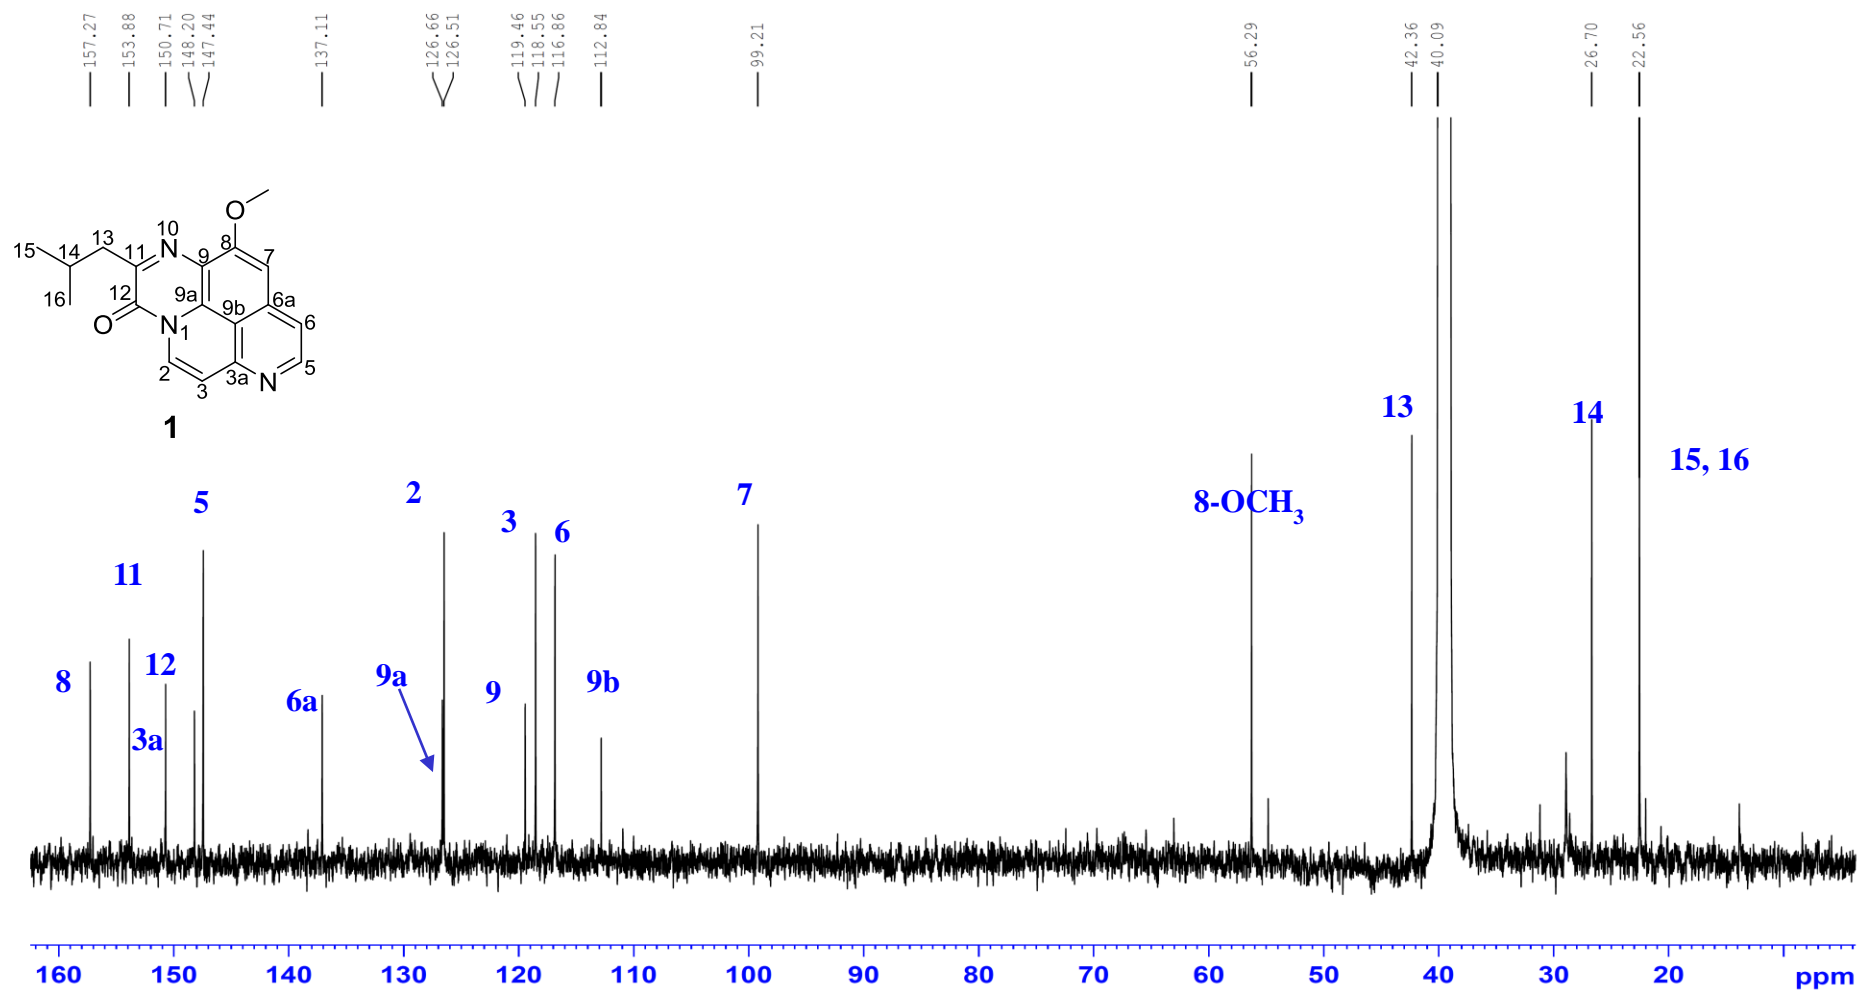

**Figure S3.** DEPT135 Spectrum of compound **1** in DMSO-*d*<sub>6</sub>.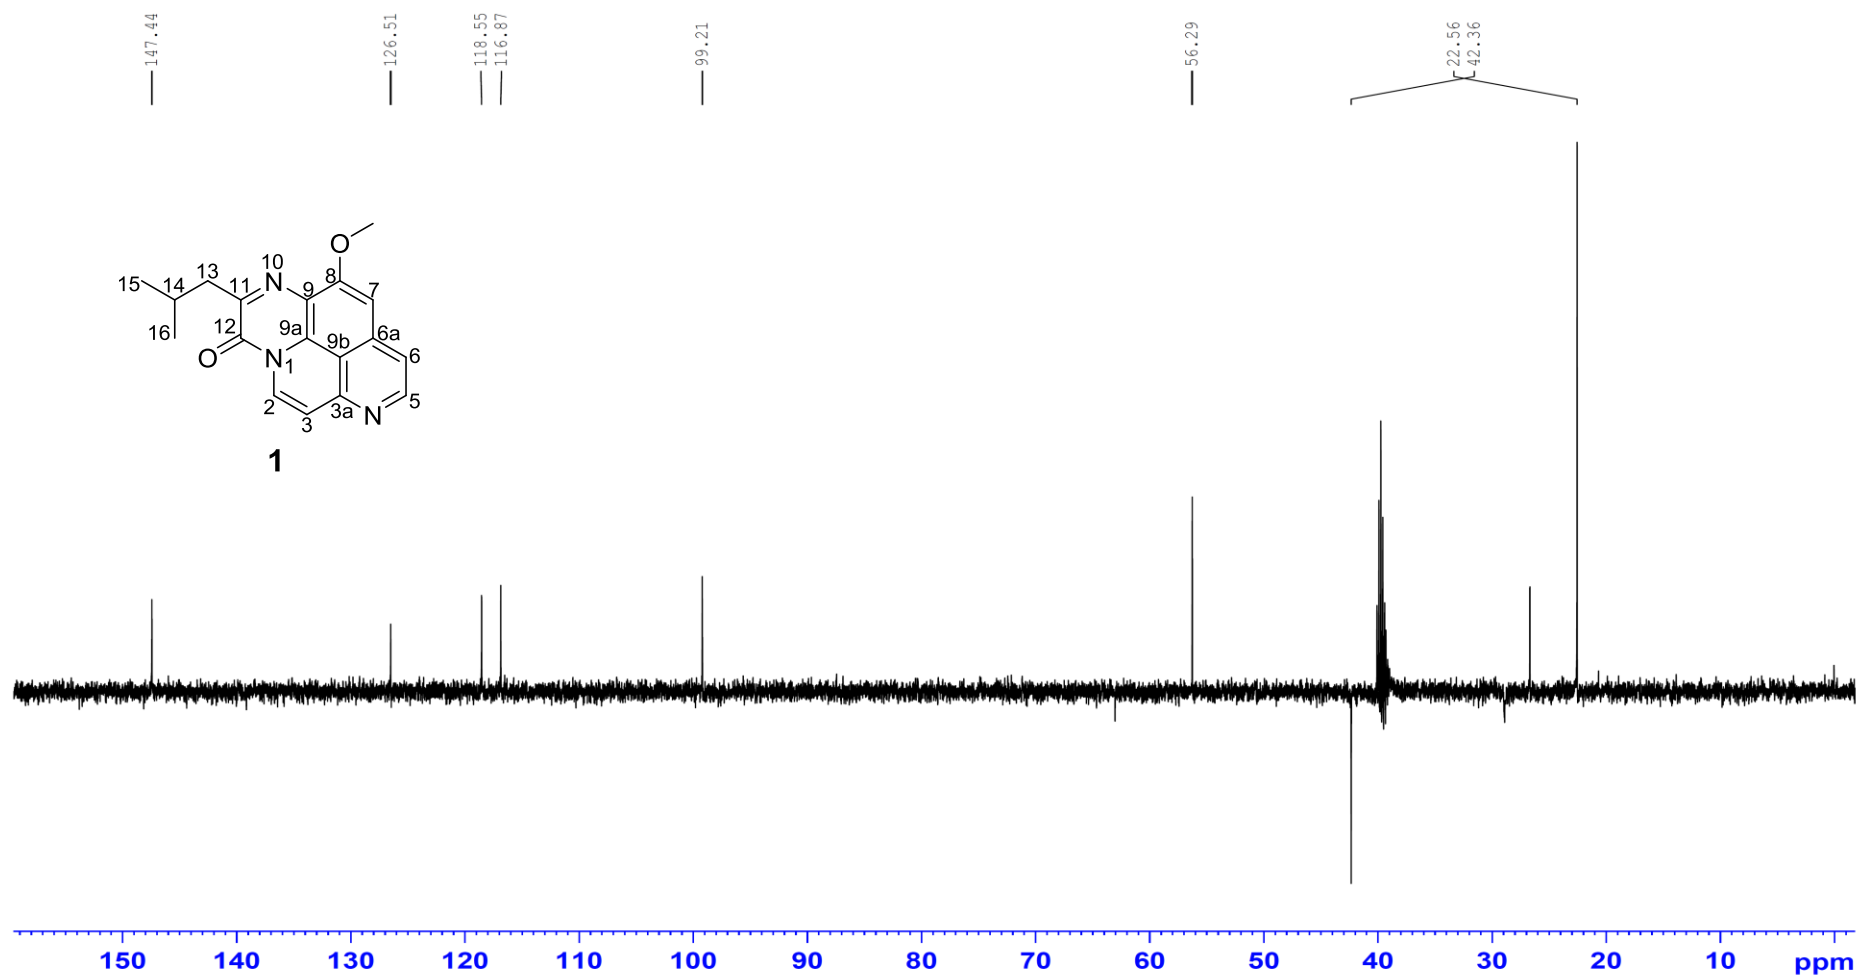

**Figure S4.** HSQC spectrum of compound **1** in DMSO-*d*<sub>6</sub>.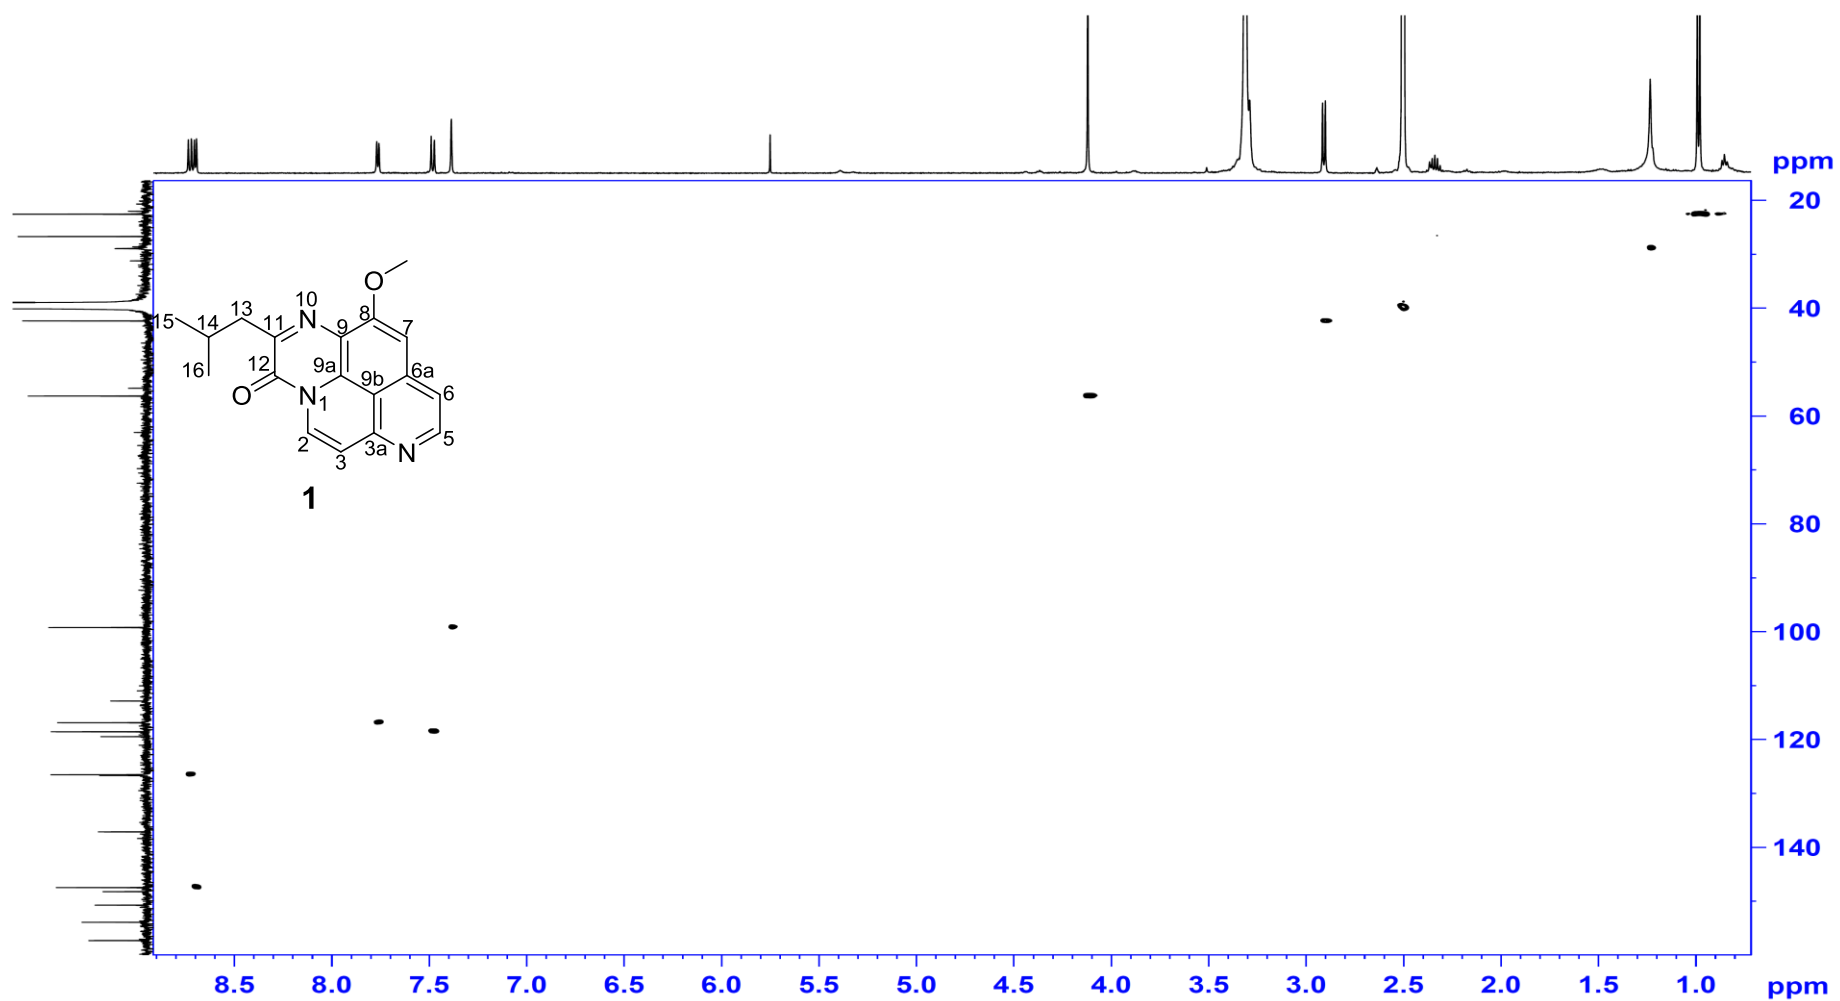

**Figure S5.** HMBC spectrum of compound **1** in DMSO-*d*<sub>6</sub>.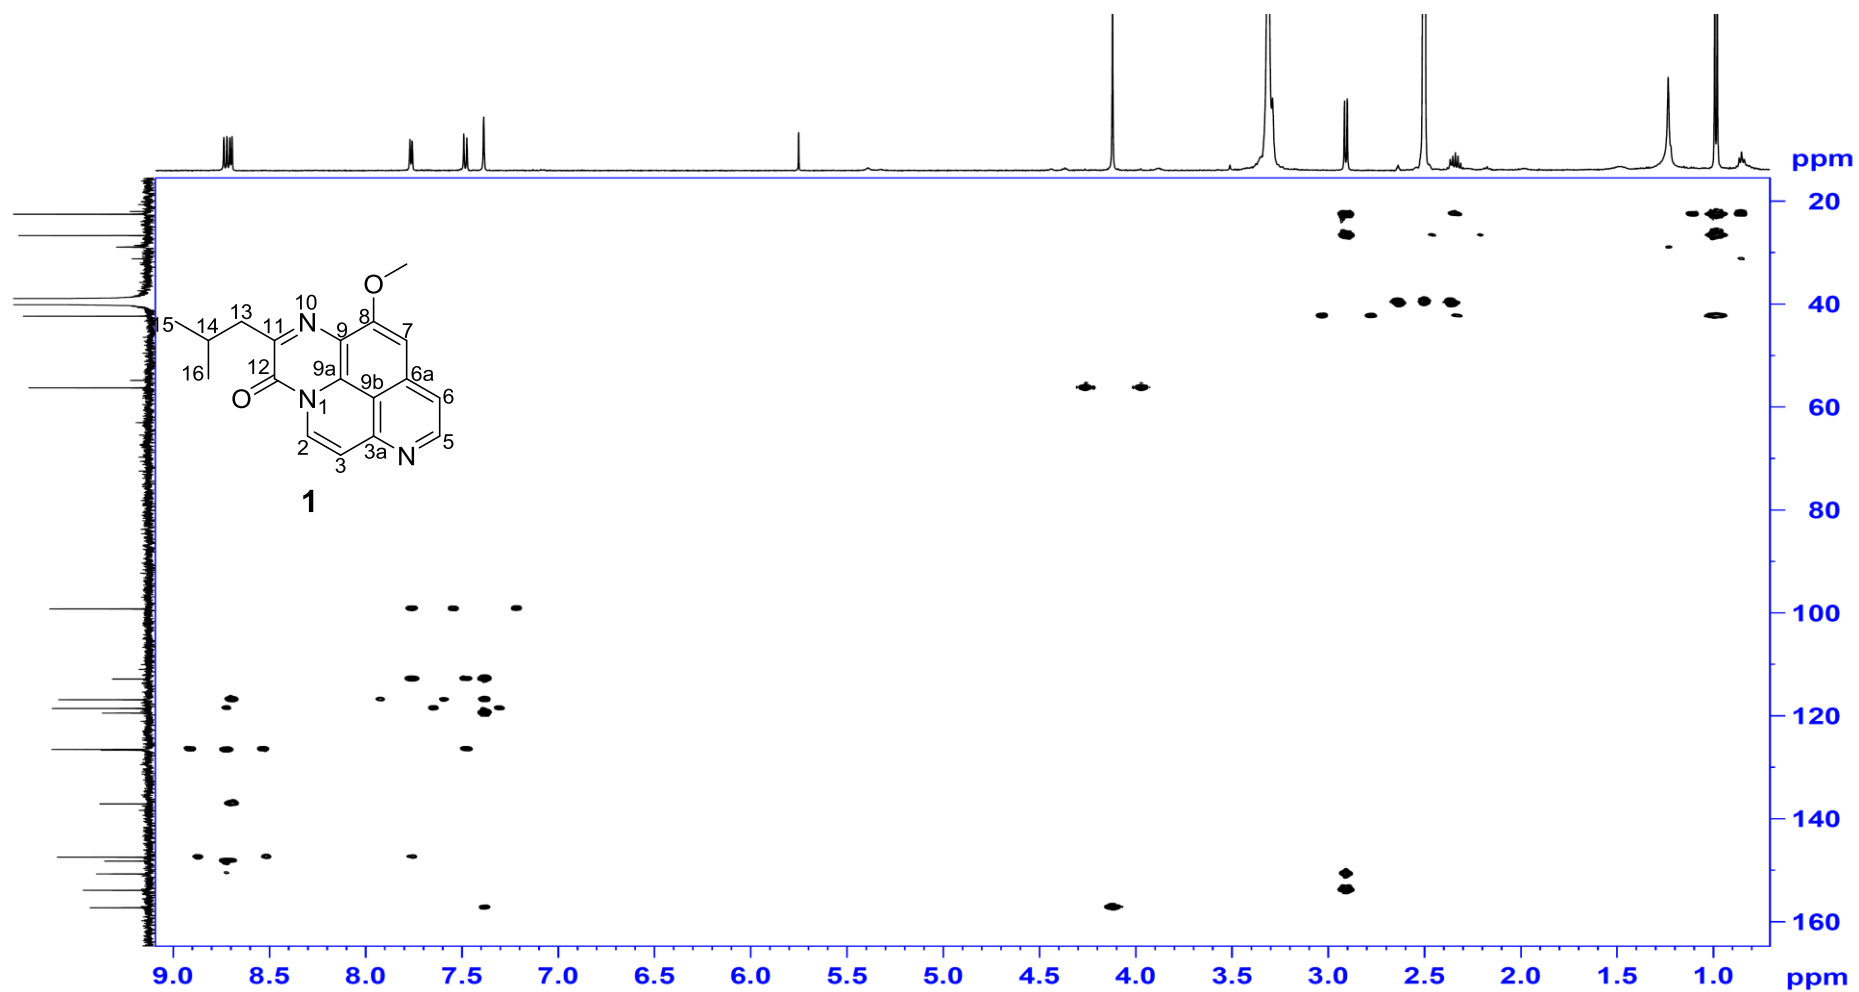

**Figure S6.**  $^1\text{H}$ - $^1\text{H}$  COSY spectrum of compound **1** in  $\text{DMSO}-d_6$ .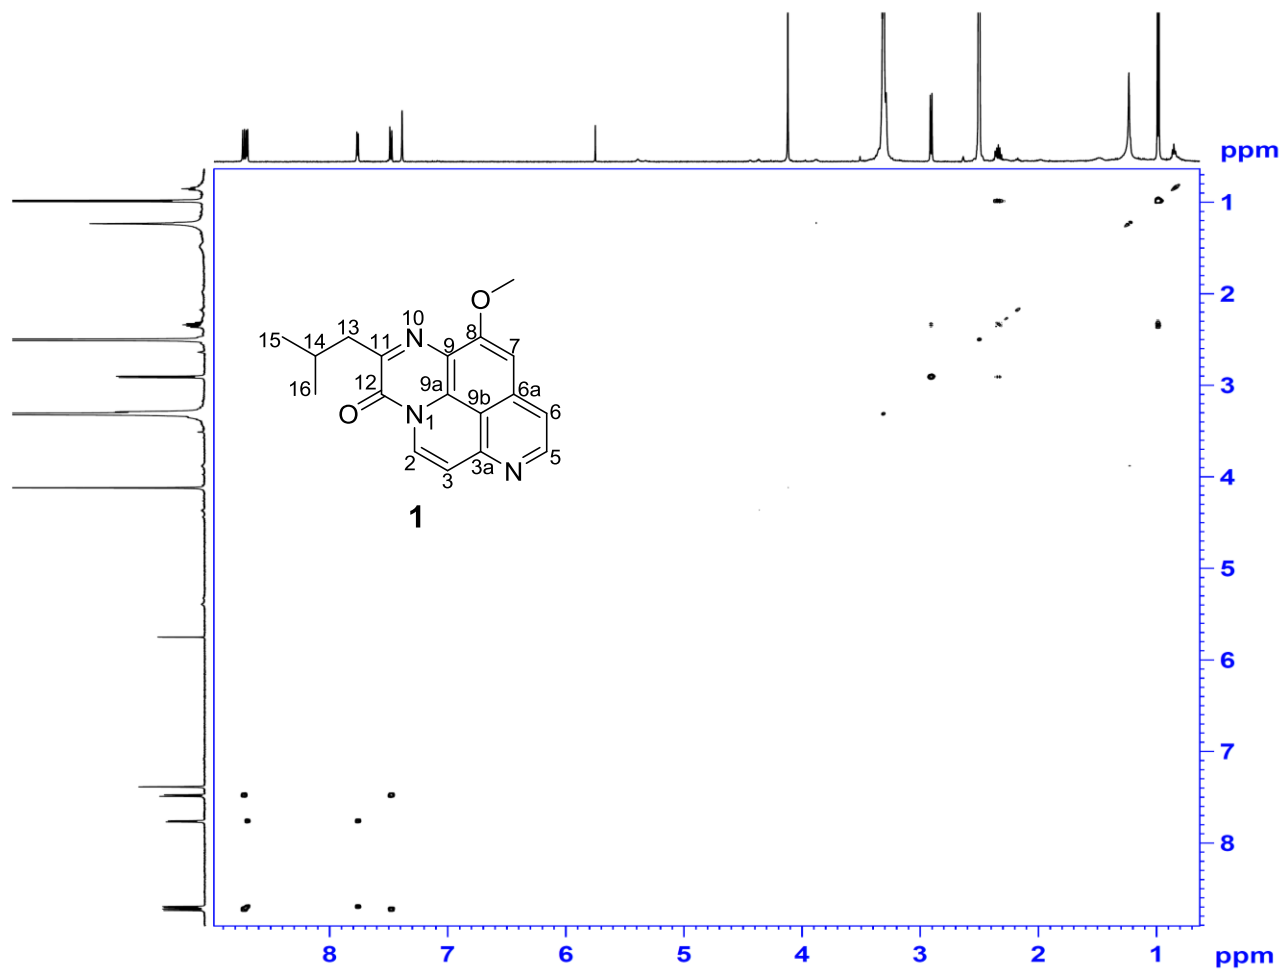

**Figure S7.** NOESY spectrum of compound **1** in DMSO-*d*<sub>6</sub>.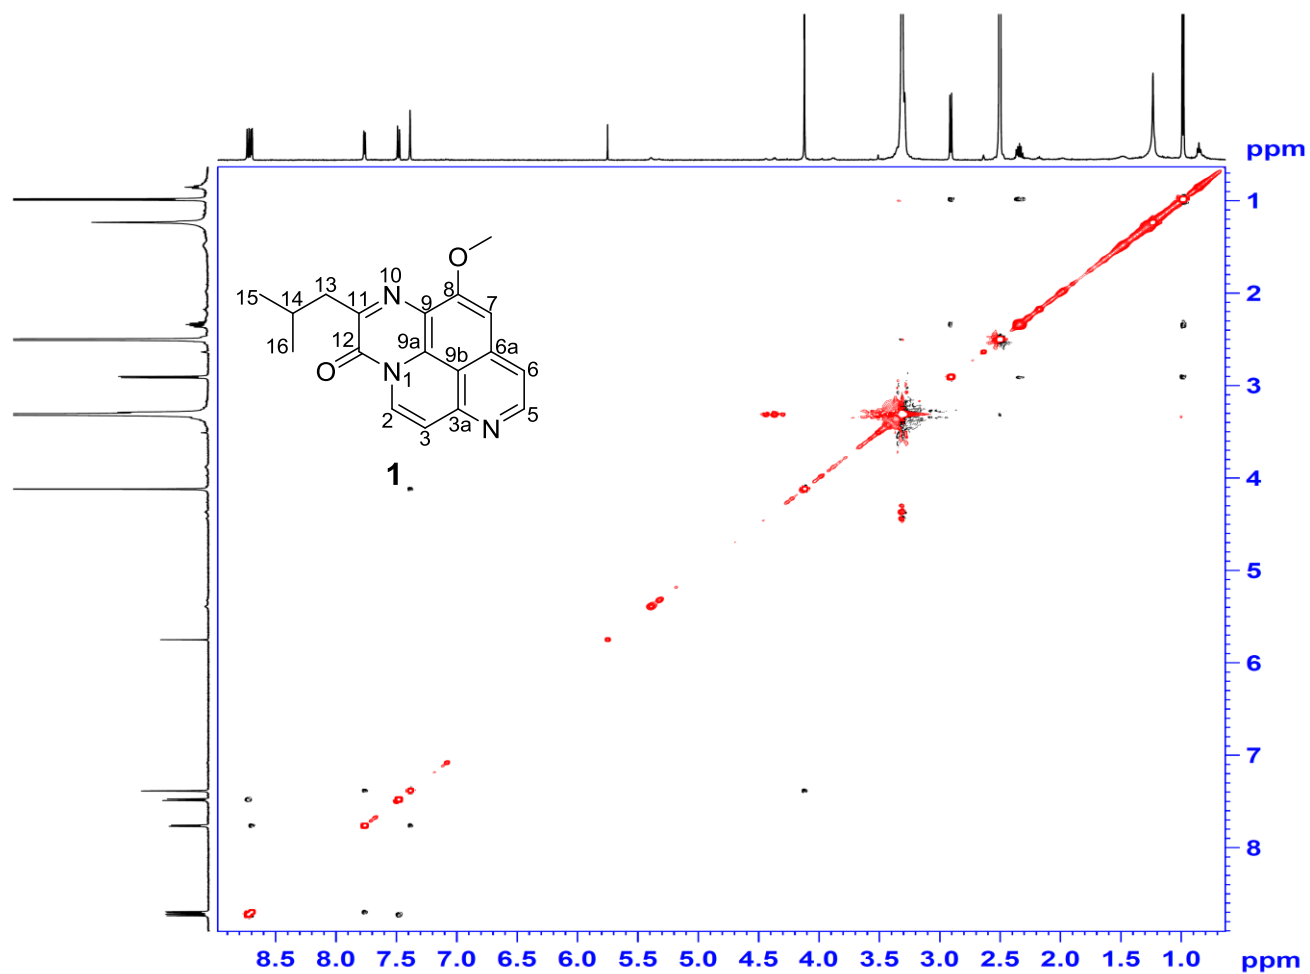

Figure S8. IR spectrum of compound 1.

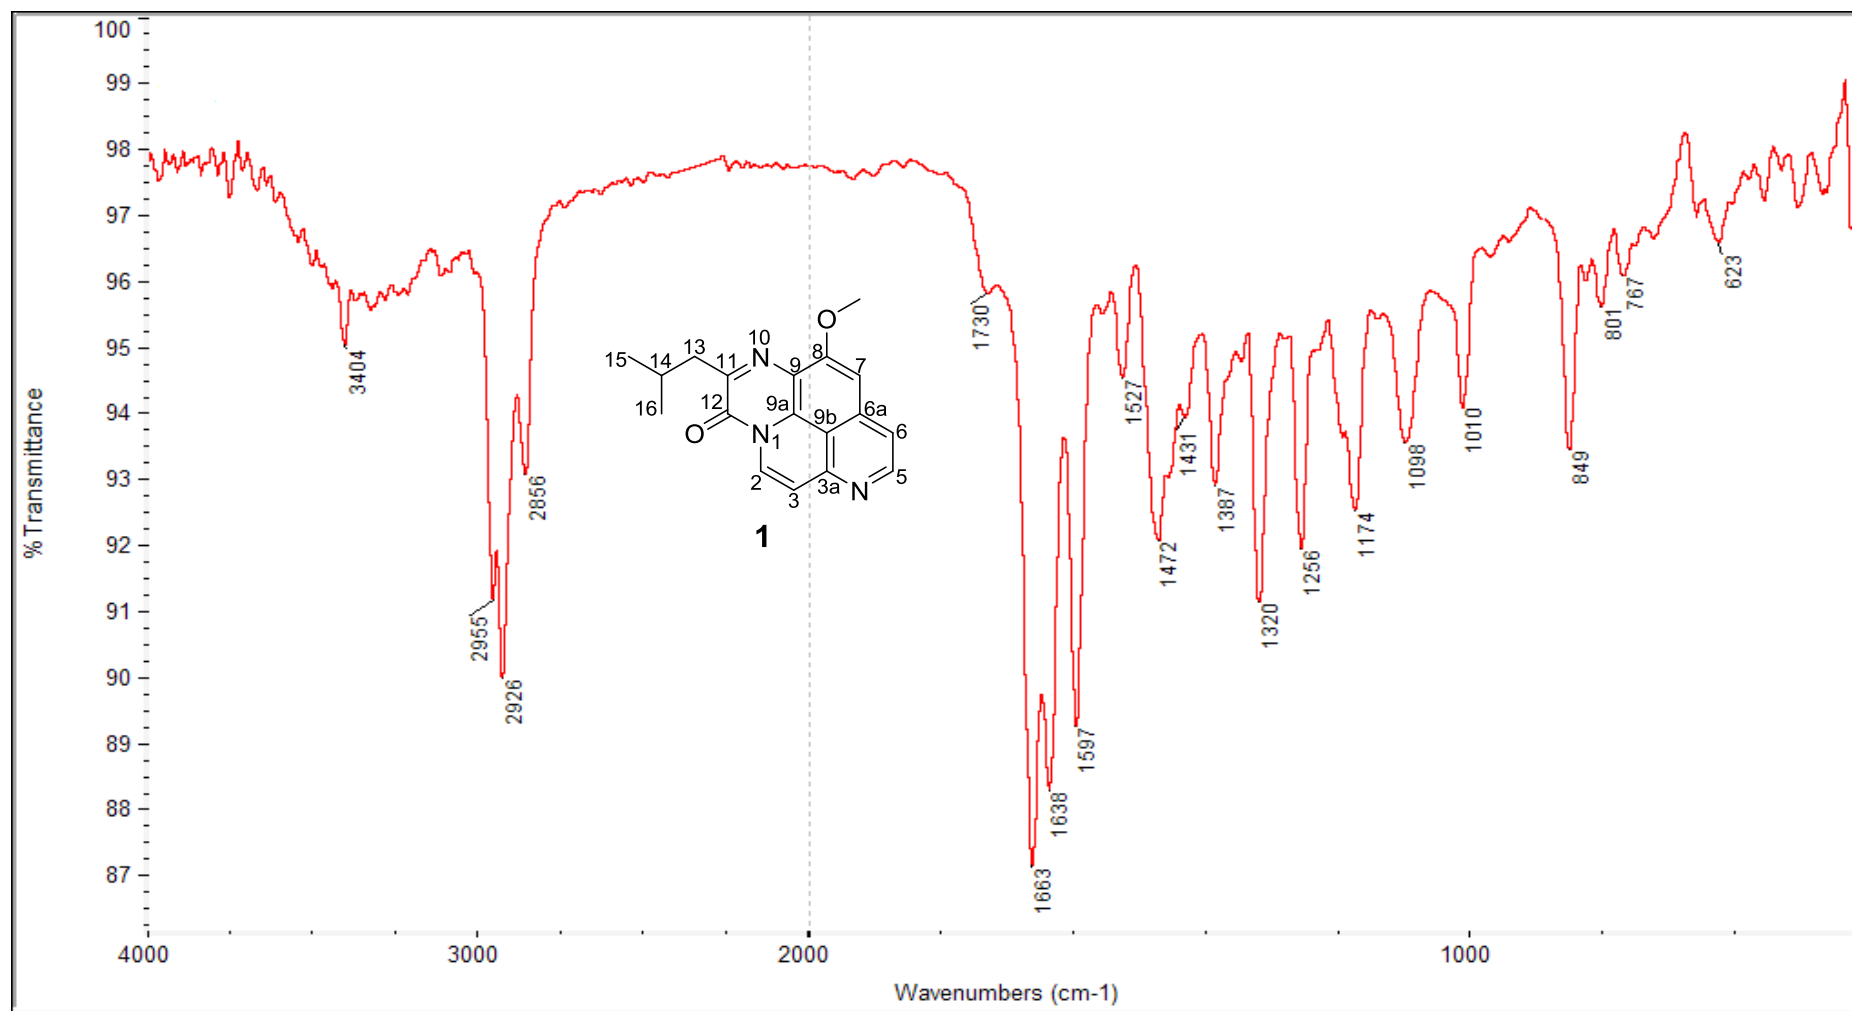

Figure S9. HRESIMS of compound 1.

## Elemental Composition Report

Page 1

Tolerance = 50.0 PPM / DBE: min = -1.5, max = 50.0  
 Selected filters: None

Monoisotopic Mass, Even Electron Ions

8 formula(e) evaluated with 1 results within limits (up to 50 closest results for each mass)

Elements Used:

C: 5-20 H: 5-25 N: 1-3 O: 1-2 Na: 1-1

SIPI

M.W=307

Q-ToF micro

YA019

22-Jul-2014,15:21:17

WQ14-219H2 15 (0.517) AM (Cen,4, 80.00, Ar,5000.0,335.13,0.70); Sm (SG, 2x3.00); Cm (10:19)

TOF MS ES+  
1.02e3

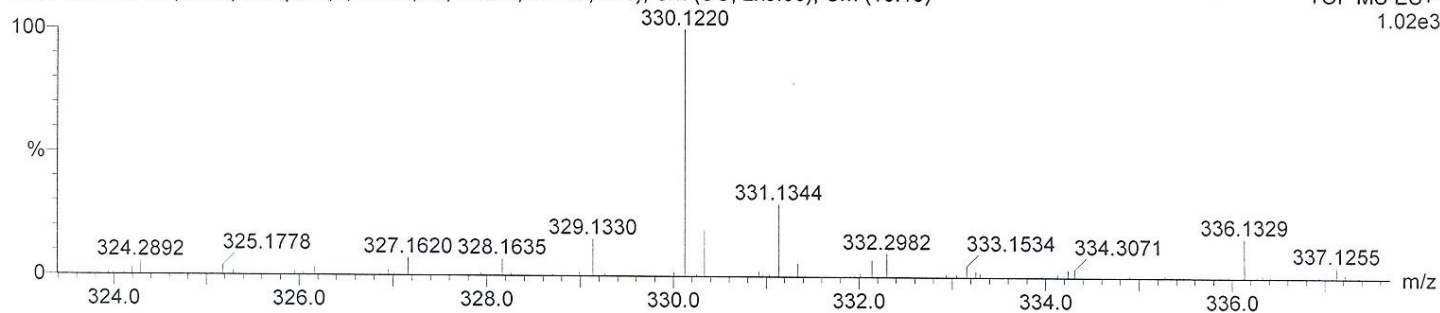

Minimum: 60.00  
 Maximum: 100.00

| Mass     | RA     | Calc. Mass | mDa | PPM | DBE  | i-FIT | Formula          |
|----------|--------|------------|-----|-----|------|-------|------------------|
| 330.1220 | 100.00 | 330.1218   | 0.2 | 0.6 | 11.5 | 22.0  | C18 H17 N3 O2 Na |

**Figure S10.** UV spectrum of compound **1**.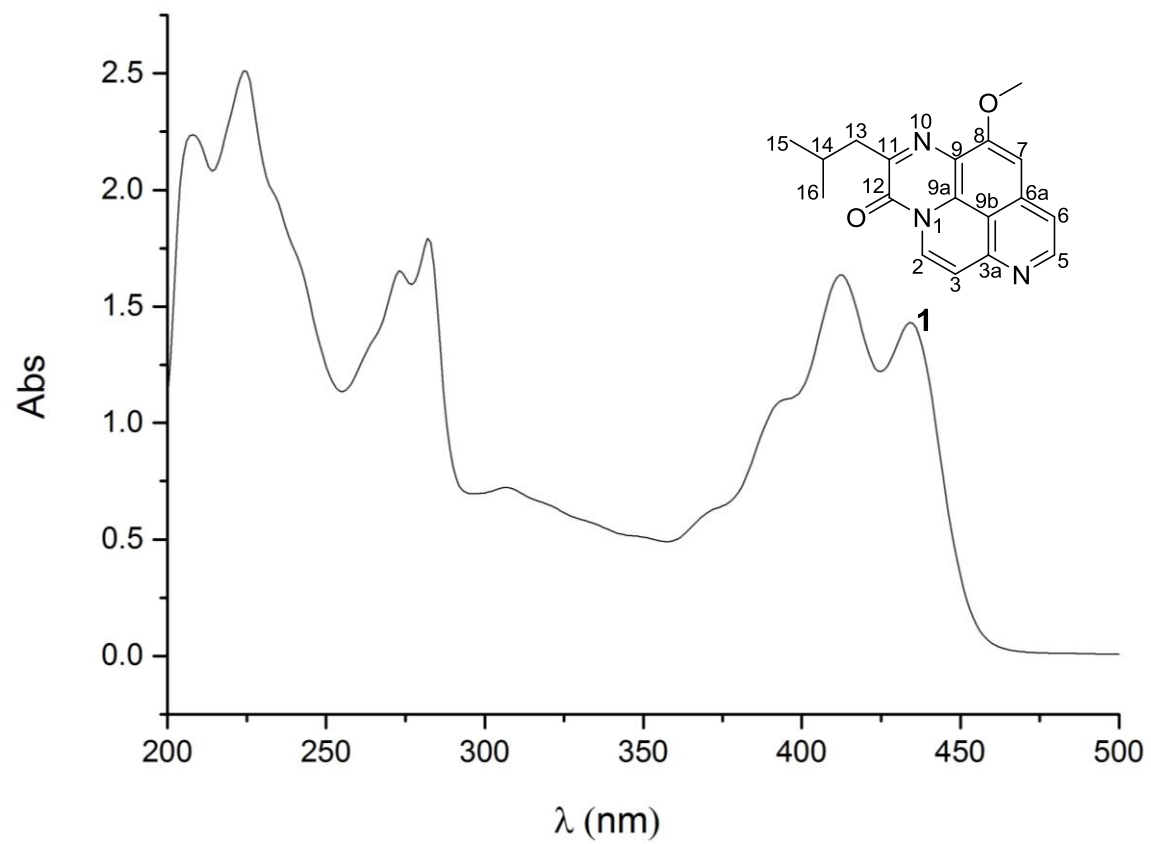

**Figure S11.**  $^1\text{H}$  NMR spectrum of compound **2** in  $\text{DMSO}-d_6$ .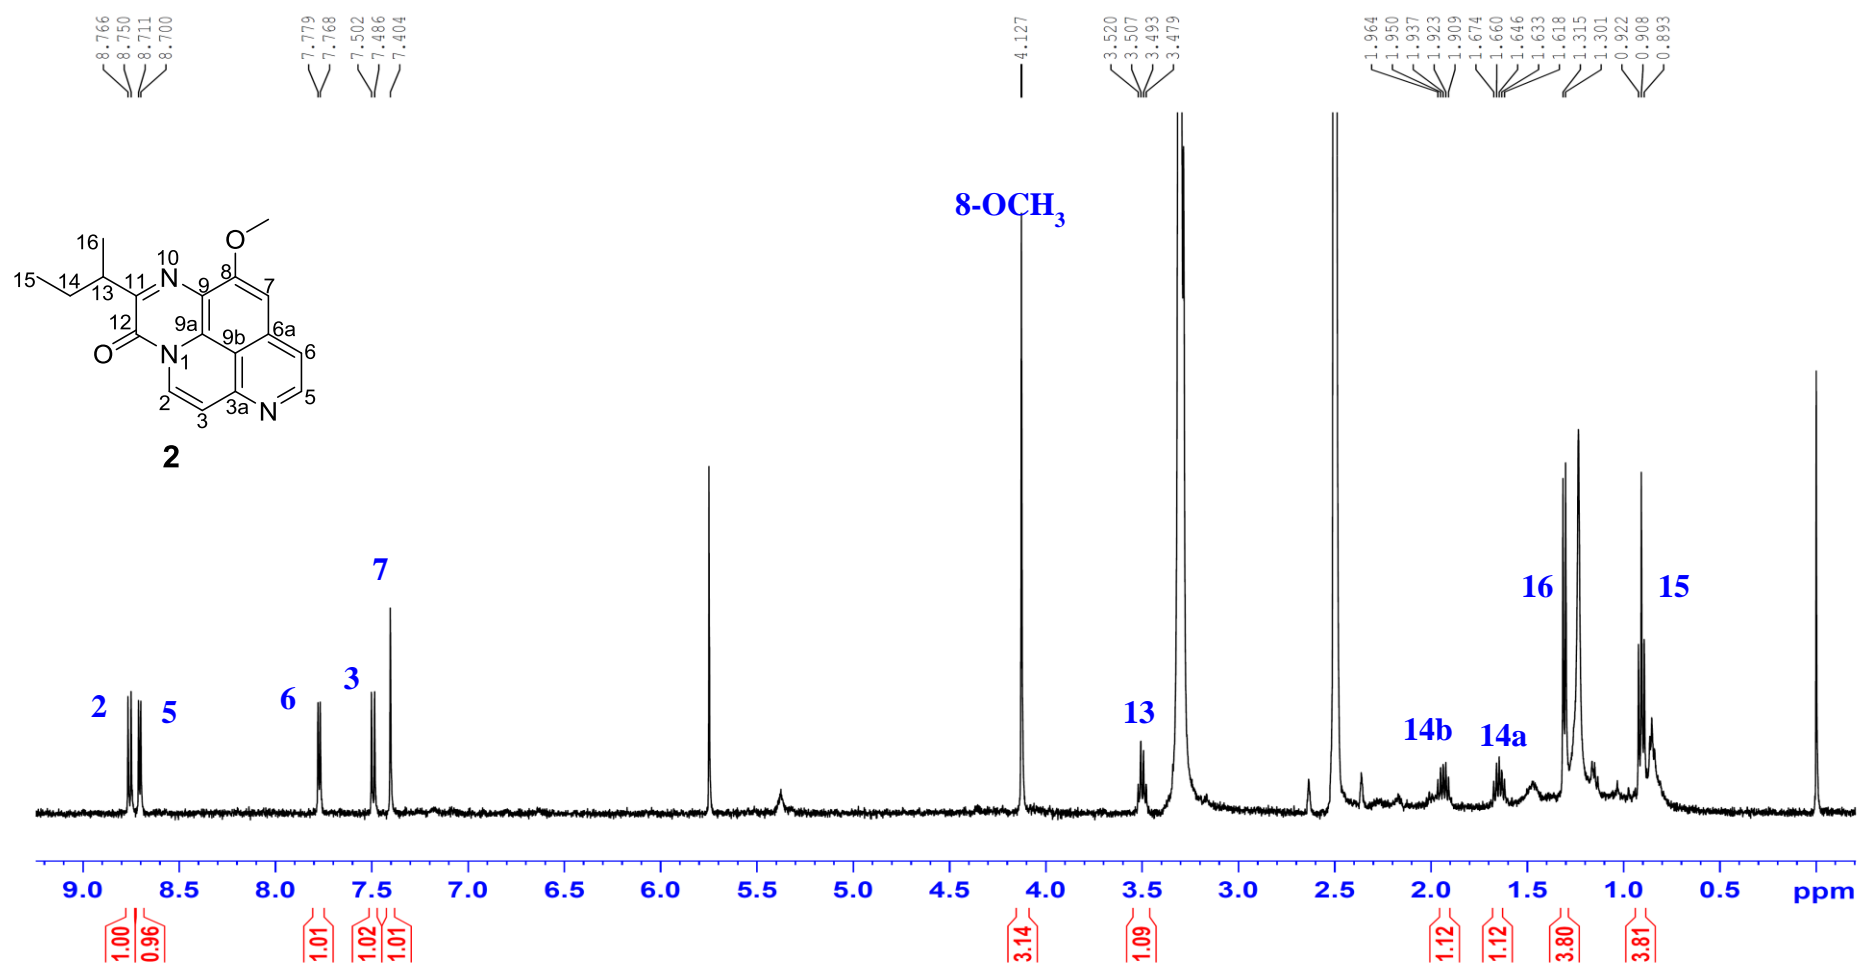

**Figure S12.**  $^{13}\text{C}$  NMR spectrum of compound **2** in  $\text{DMSO}-d_6$ .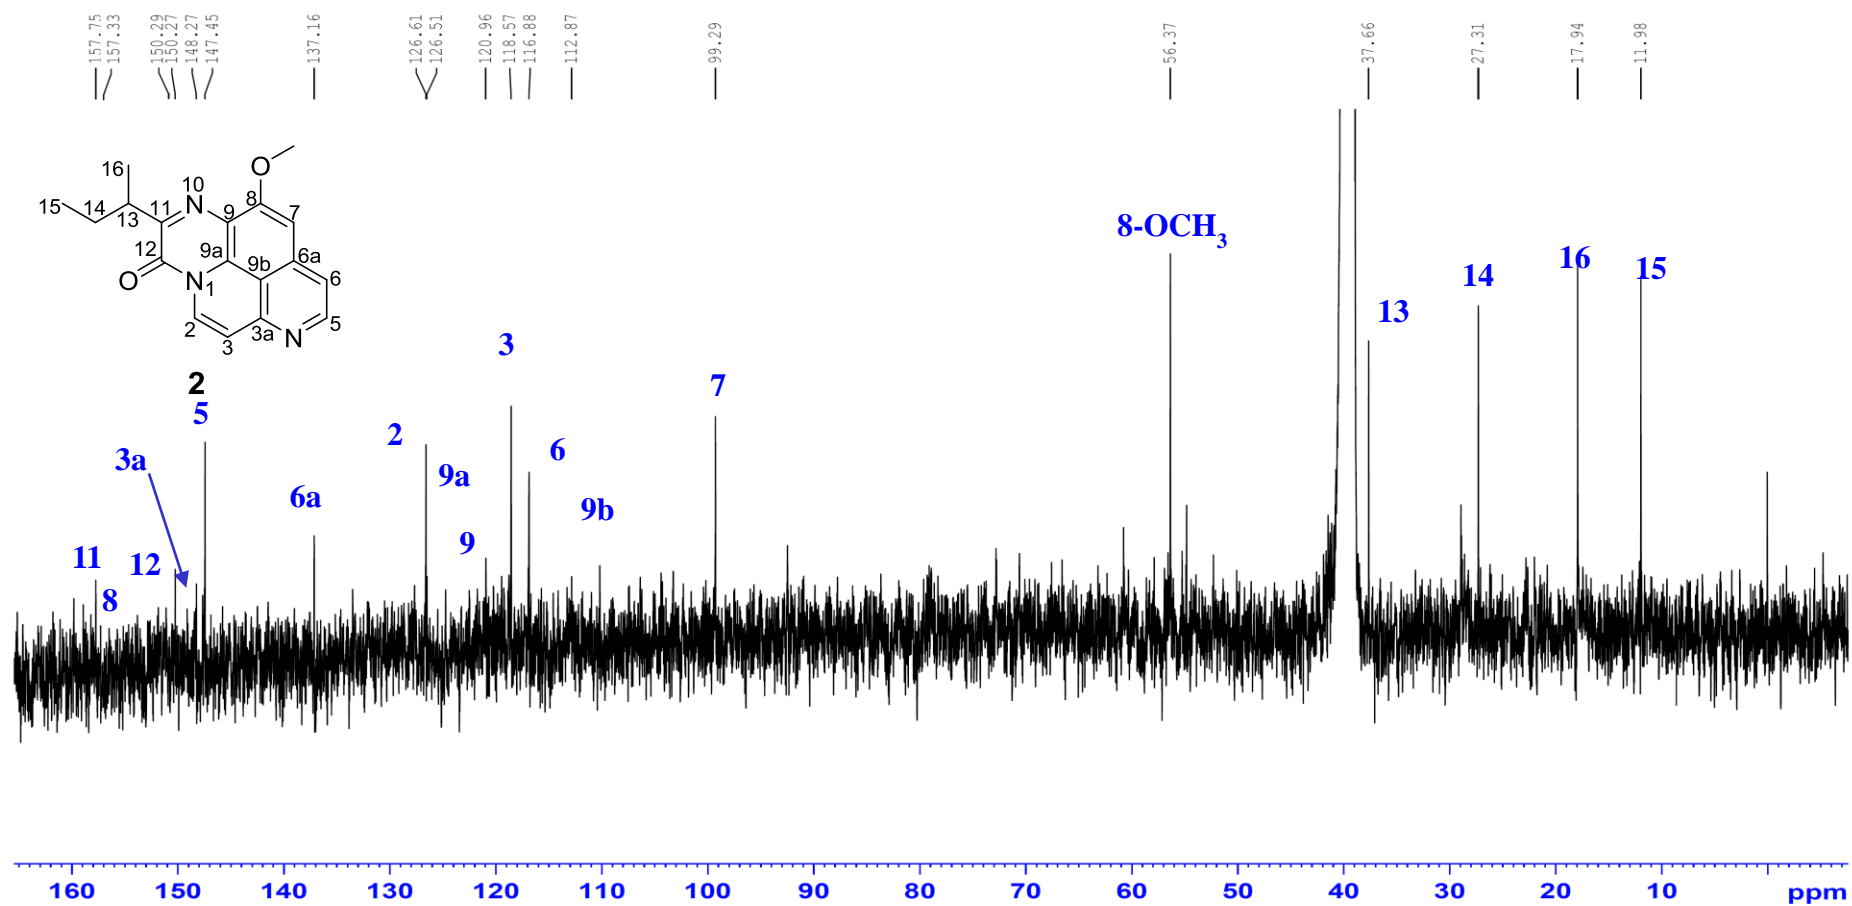

**Figure S13.** DEPT135 Spectrum of compound **2** in DMSO-*d*<sub>6</sub>.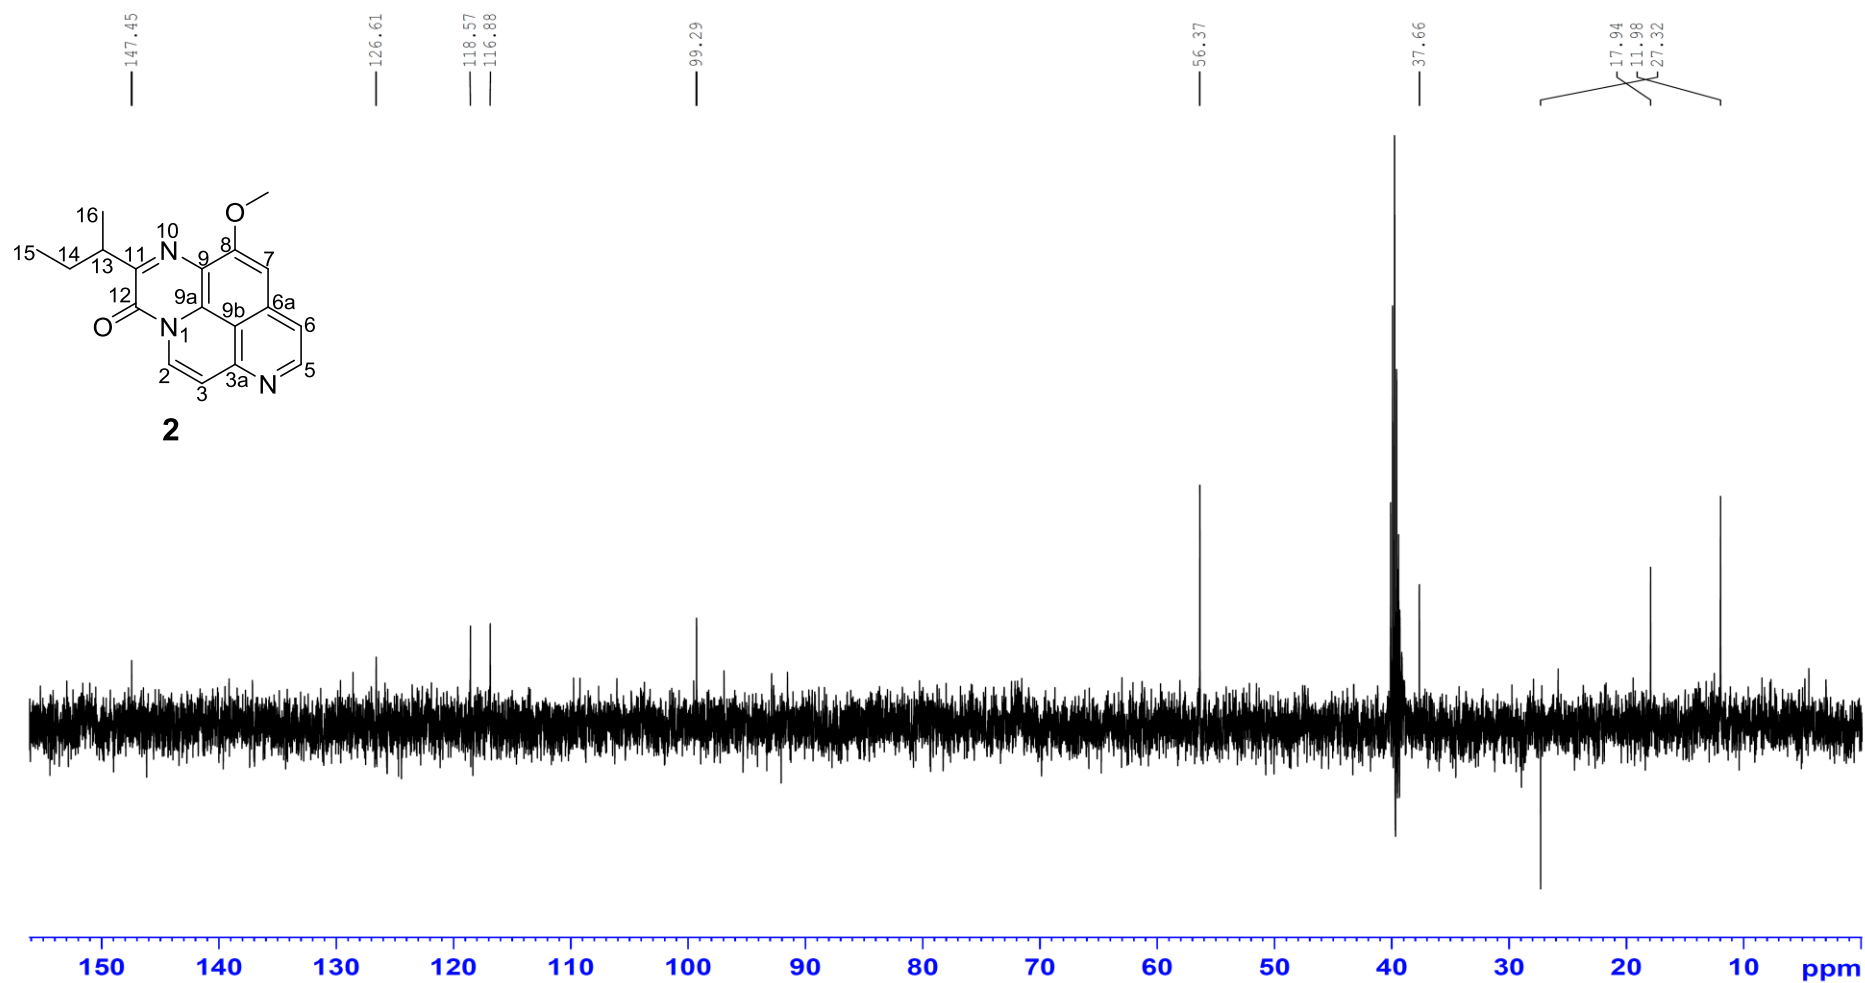

**Figure S14.** HSQC spectrum of compound **2** in DMSO-*d*<sub>6</sub>.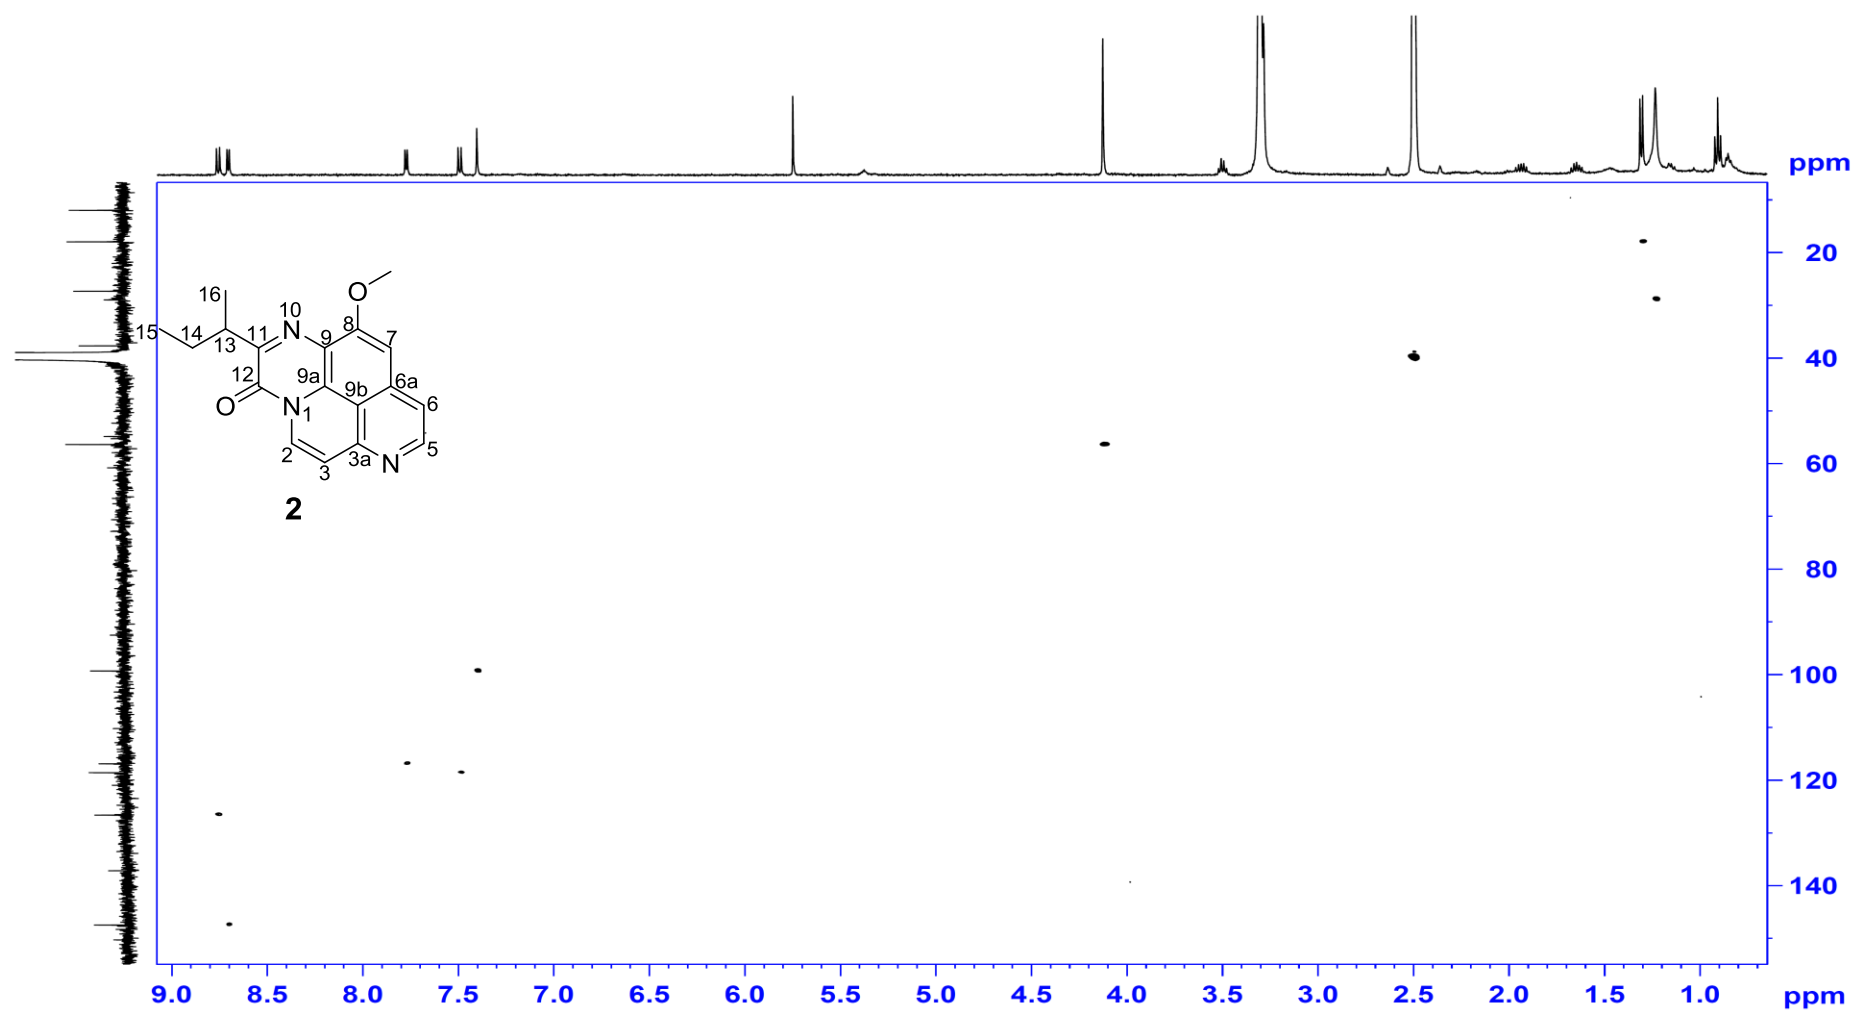

Figure S15. HMBC spectrum of compound **2** in DMSO-*d*<sub>6</sub>.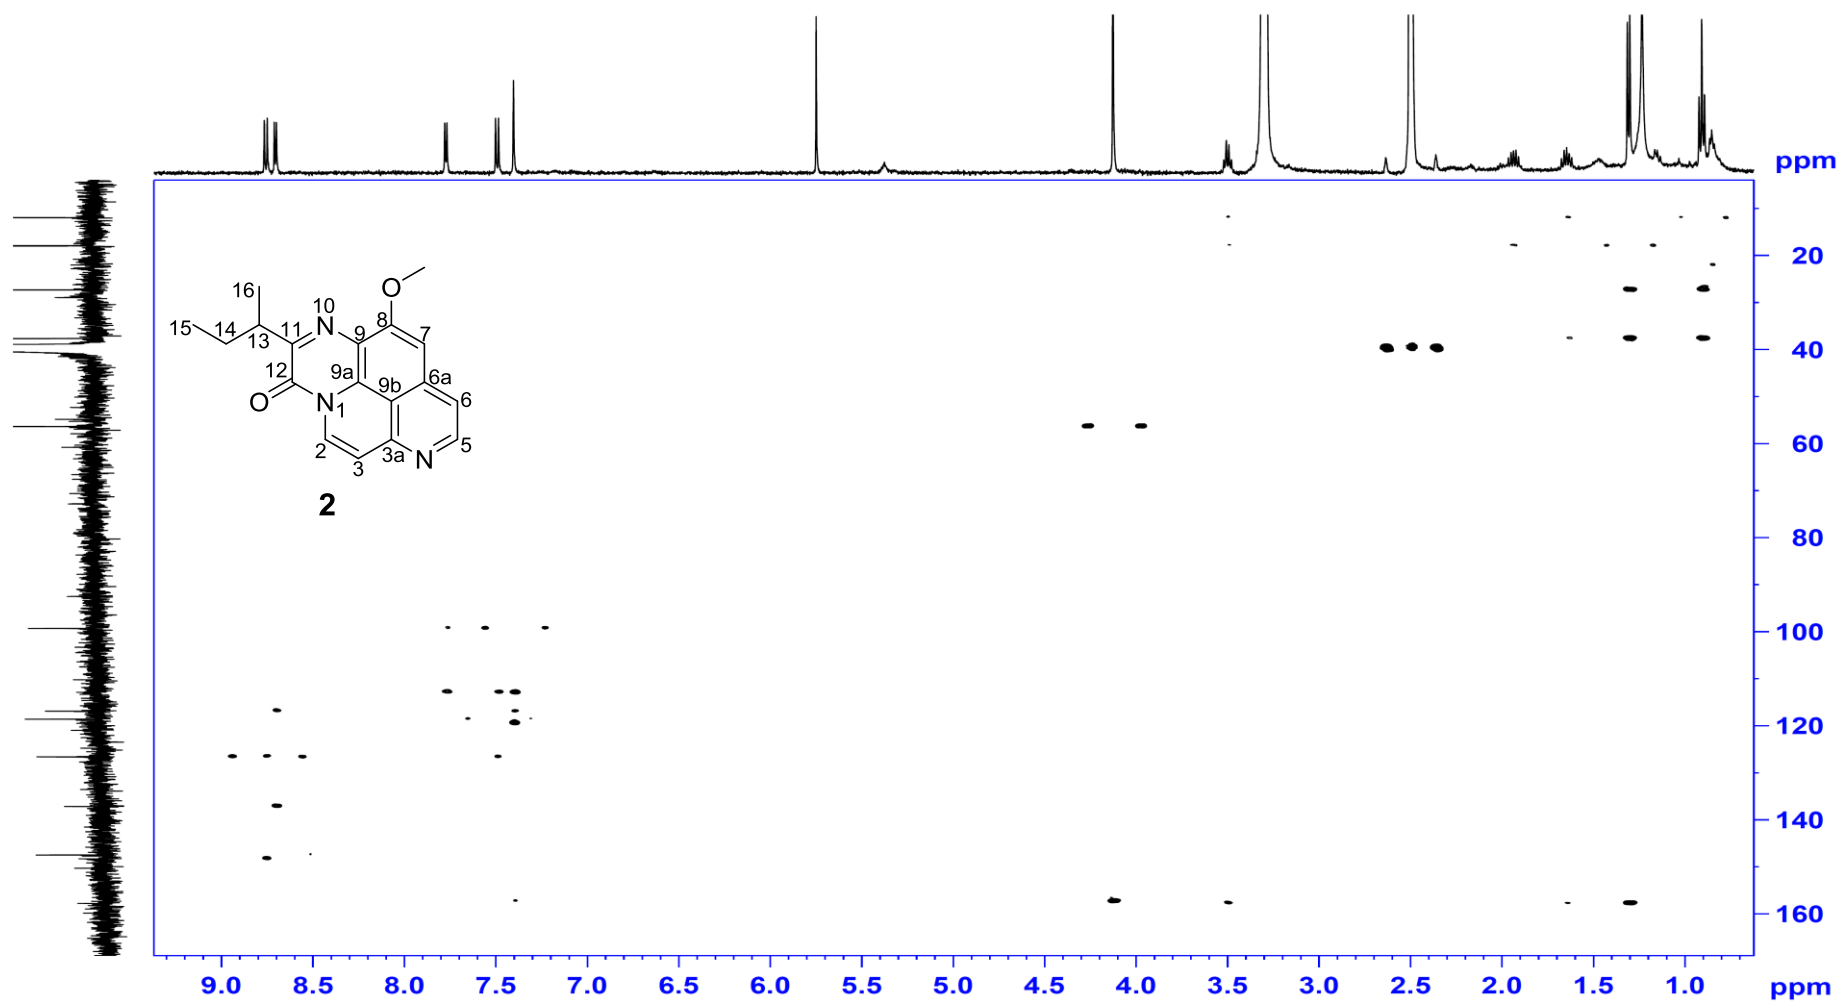

**Figure S16.**  $^1\text{H}$ - $^1\text{H}$  COSY spectrum of compound **2** in  $\text{DMSO}-d_6$ .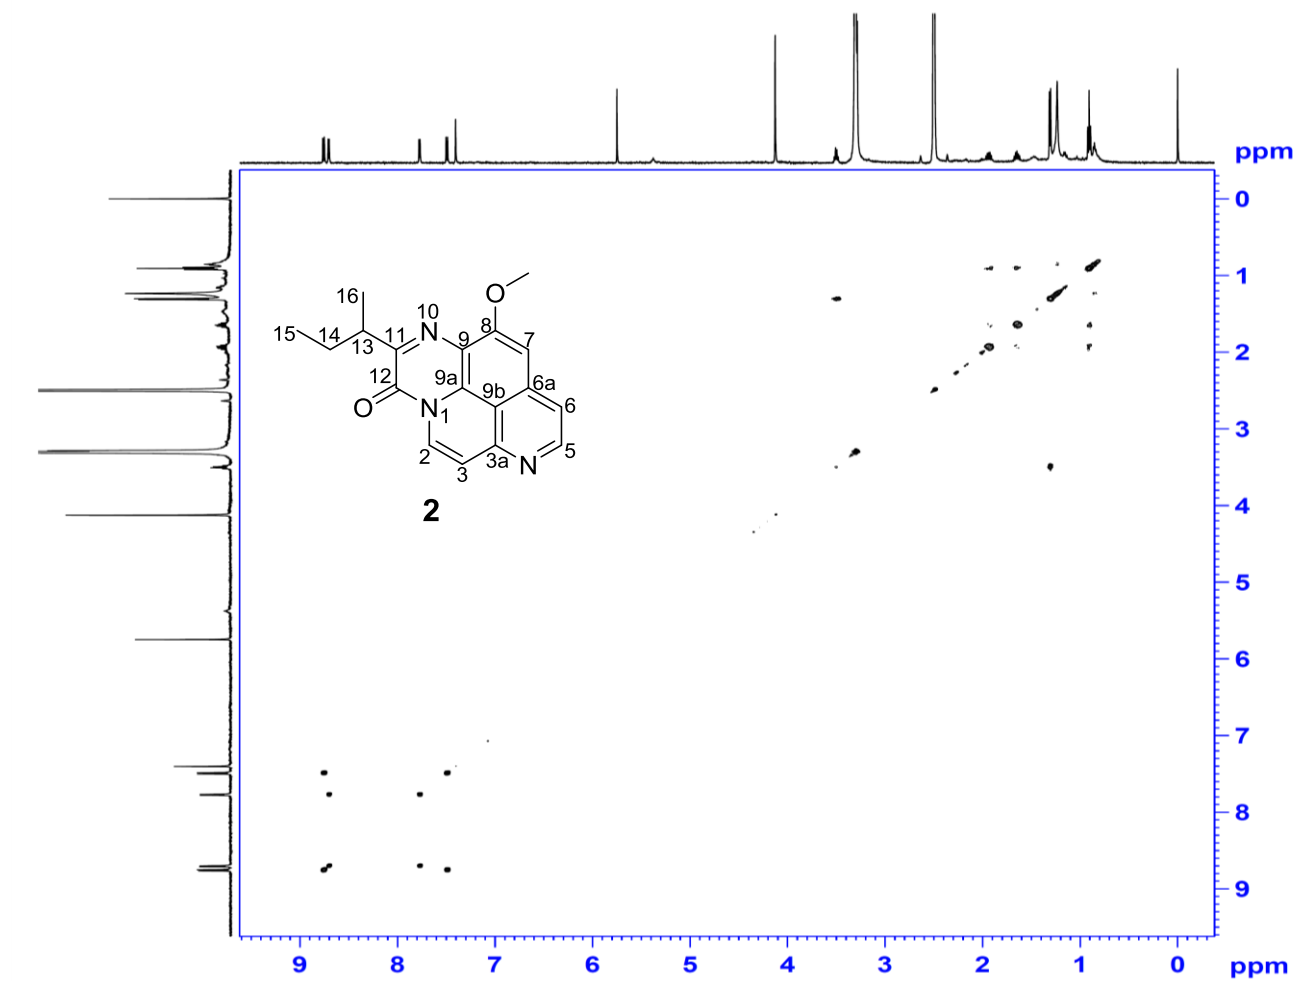

**Figure S17.** NOESY spectrum of compound **2** in DMSO-*d*<sub>6</sub>.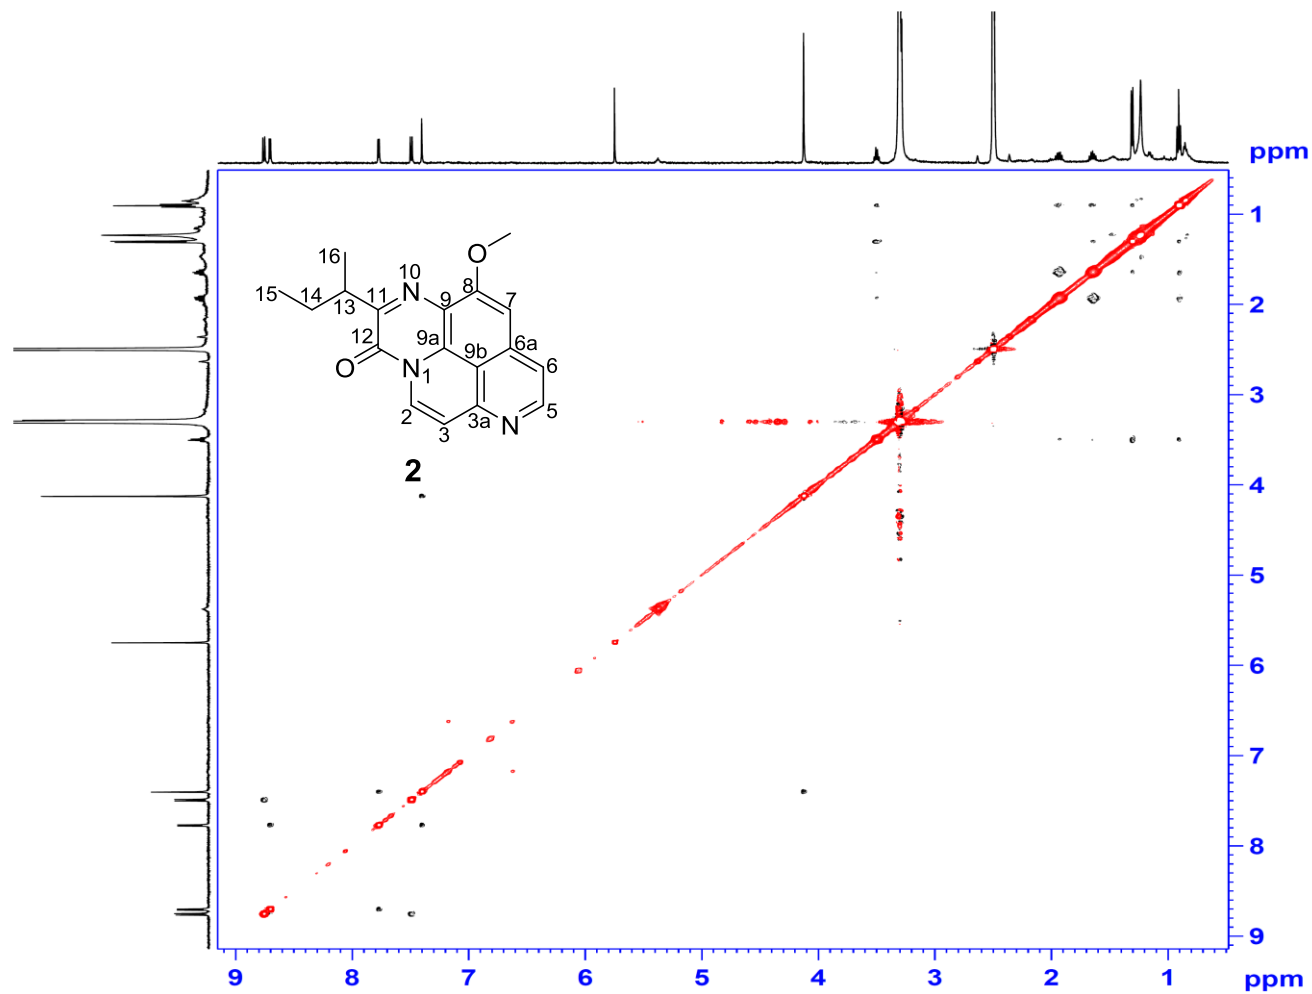

Figure S18. IR spectrum of compound 2.

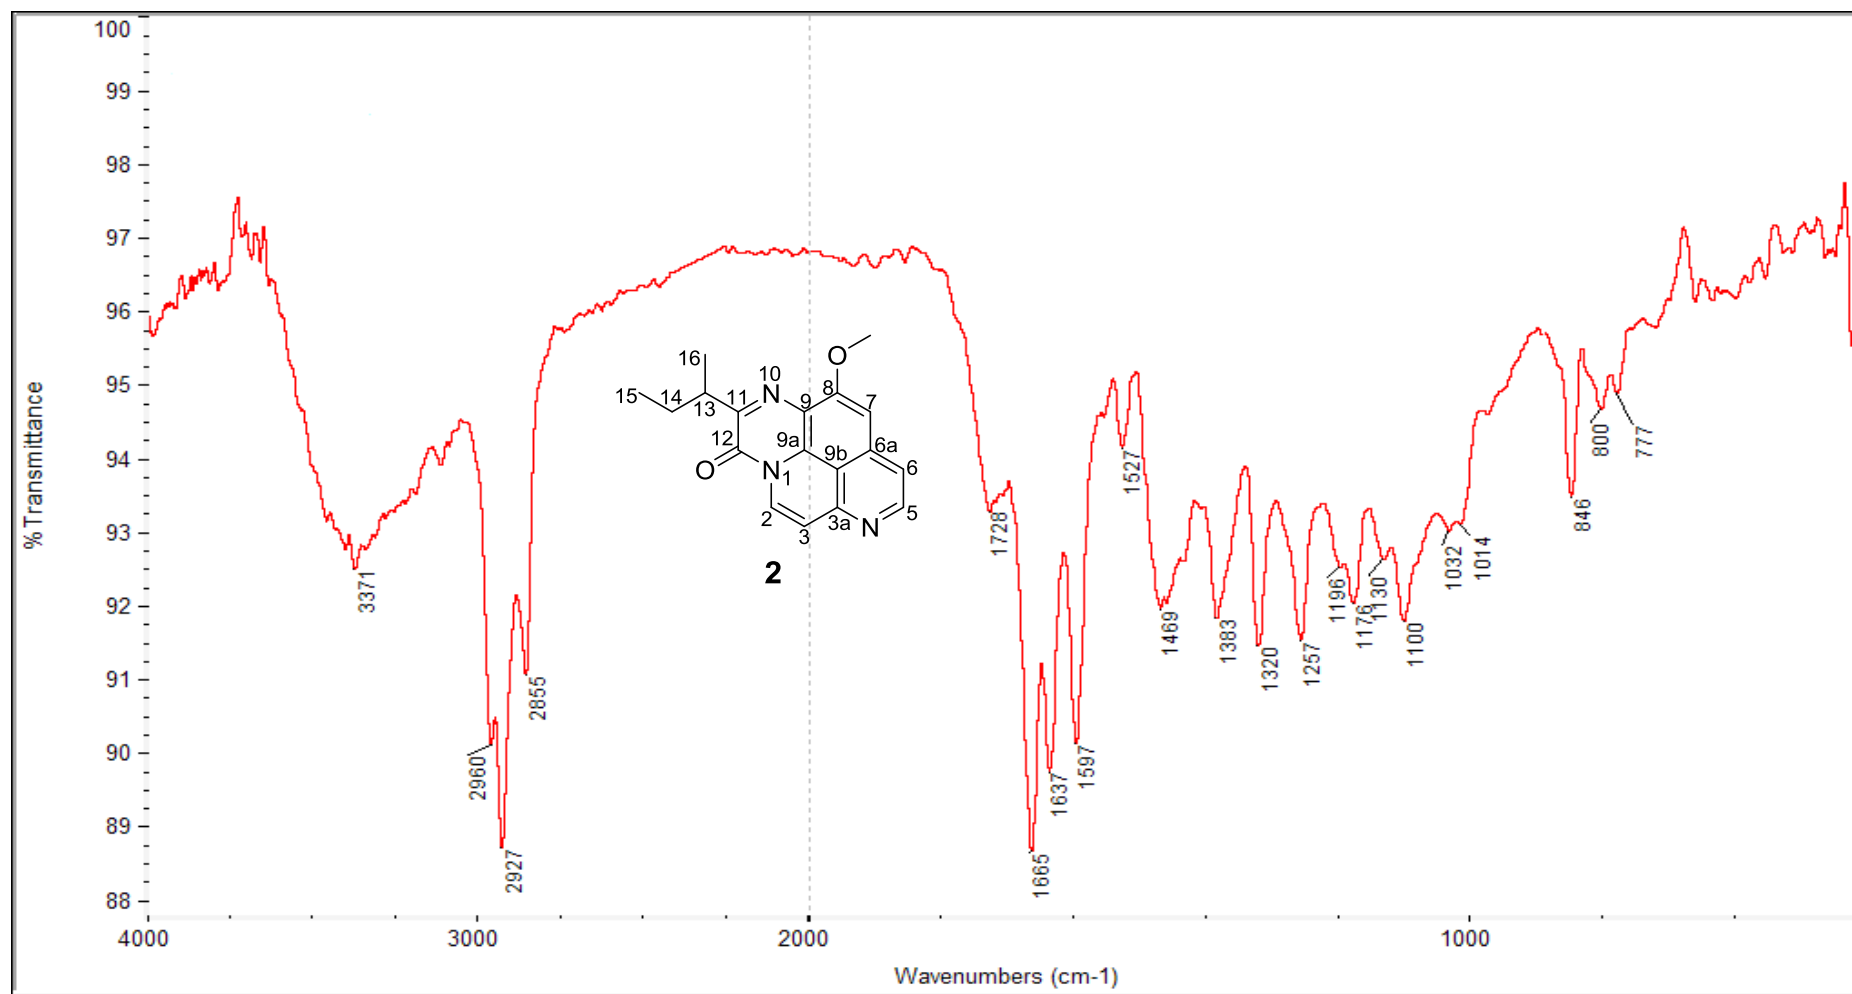

Figure S19. HRESIMS of compound 2.

## Elemental Composition Report

Tolerance = 50.0 PPM / DBE: min = -1.5, max = 50.0  
Selected filters: None

Monoisotopic Mass, Even Electron Ions

8 formula(e) evaluated with 1 results within limits (up to 50 closest results for each mass)

Elements Used:

C: 5-20 H: 5-25 N: 1-3 O: 1-2

SIPI

M.W.=307

Q-ToF micro  
YA019

22-Jul-2014, 15:27:52

WQ14-220H 27 (0.934) AM (Cen,4, 80.00, Ar,5000.0,313.15,0.70); Sm (SG, 2x3.00); Cm (21:29)

TOF MS ES+  
4.03e3

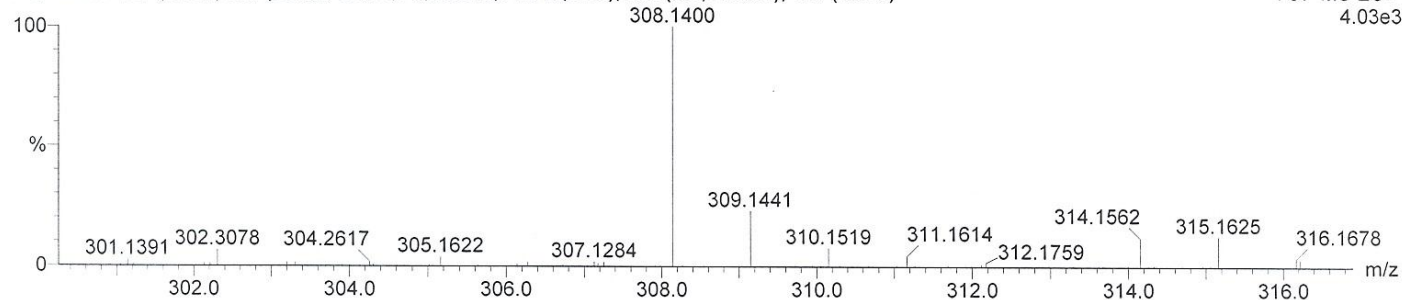

Minimum: 60.00  
Maximum: 100.00

| Mass     | RA     | Calc. Mass | mDa | PPM | DBE  | i-FIT | Formula       |
|----------|--------|------------|-----|-----|------|-------|---------------|
| 308.1400 | 100.00 | 308.1399   | 0.1 | 0.3 | 11.5 | 64.9  | C18 H18 N3 O2 |

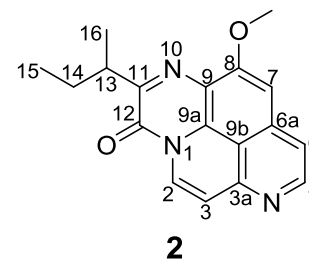

Page 1

**Figure S20.** UV spectrum of compound **2**.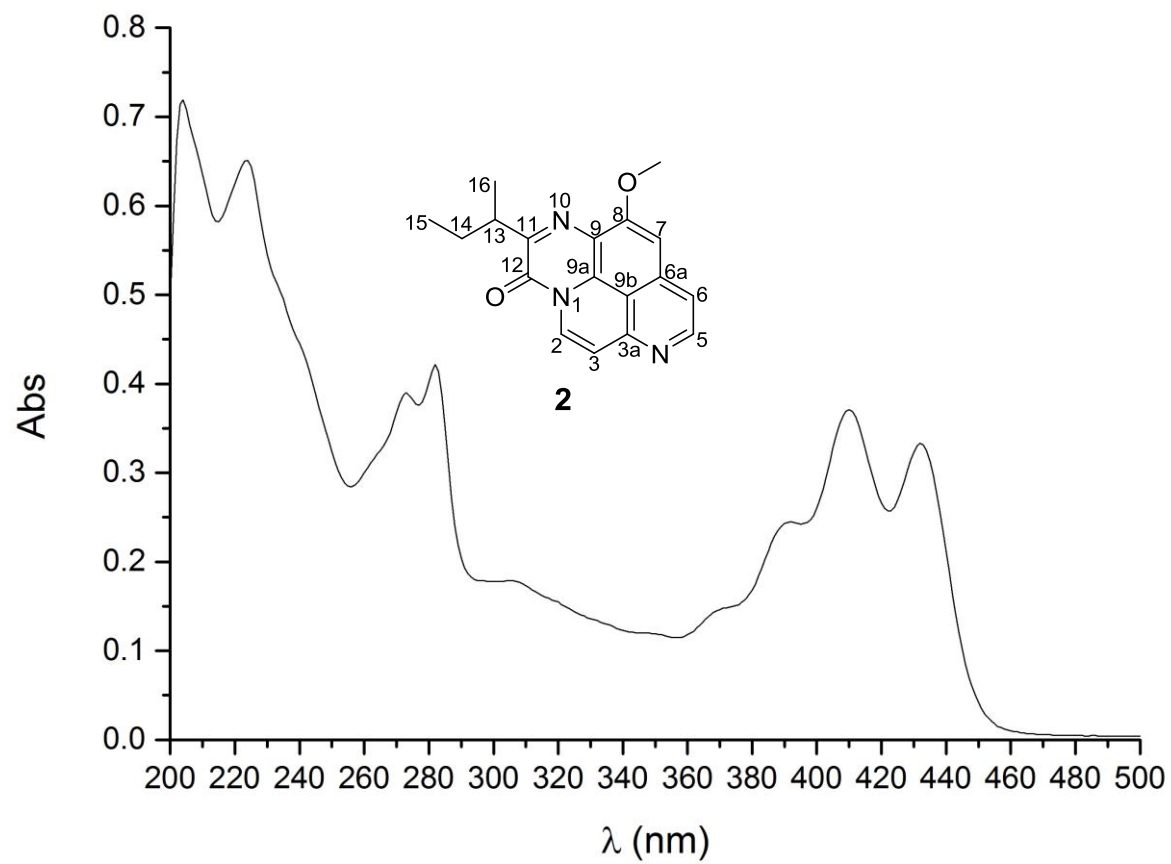

**Figure S21.**  $^1\text{H}$  NMR spectrum of compound **3** in  $\text{CDCl}_3$ .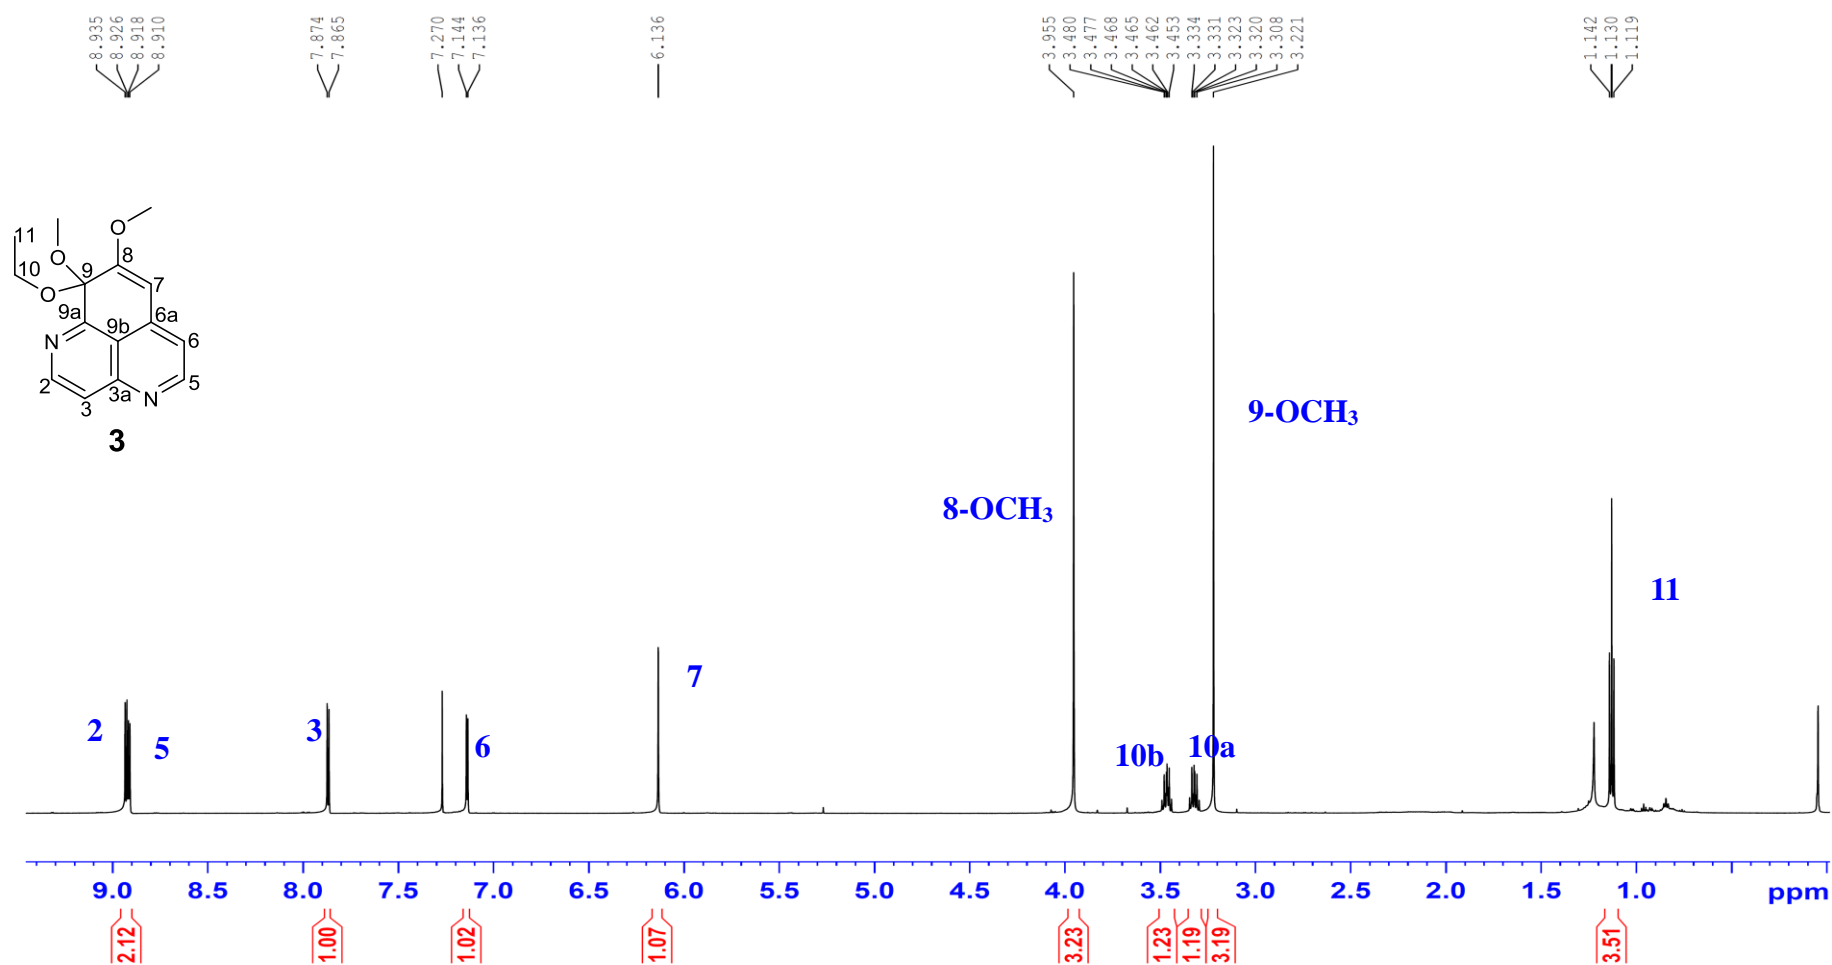

**Figure S22.**  $^{13}\text{C}$  NMR spectrum of compound **3** in  $\text{CDCl}_3$ .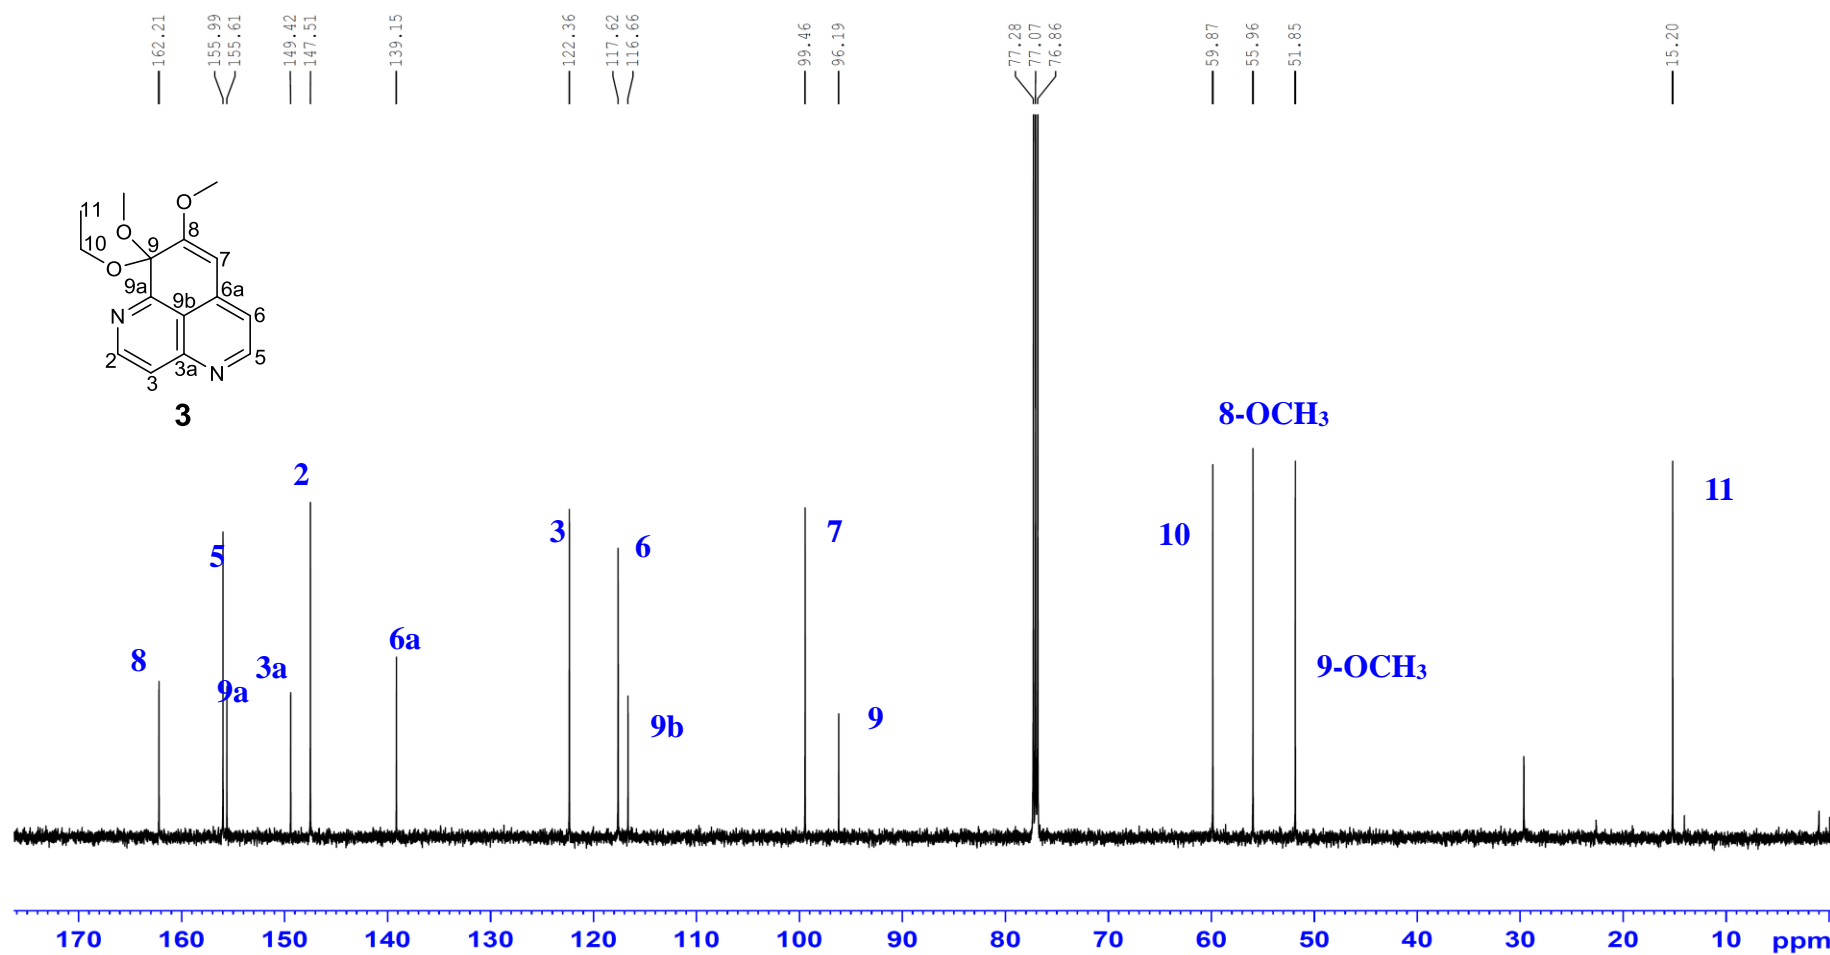

**Figure S23.** DEPT135 Spectrum of compound **3** in CDCl<sub>3</sub>.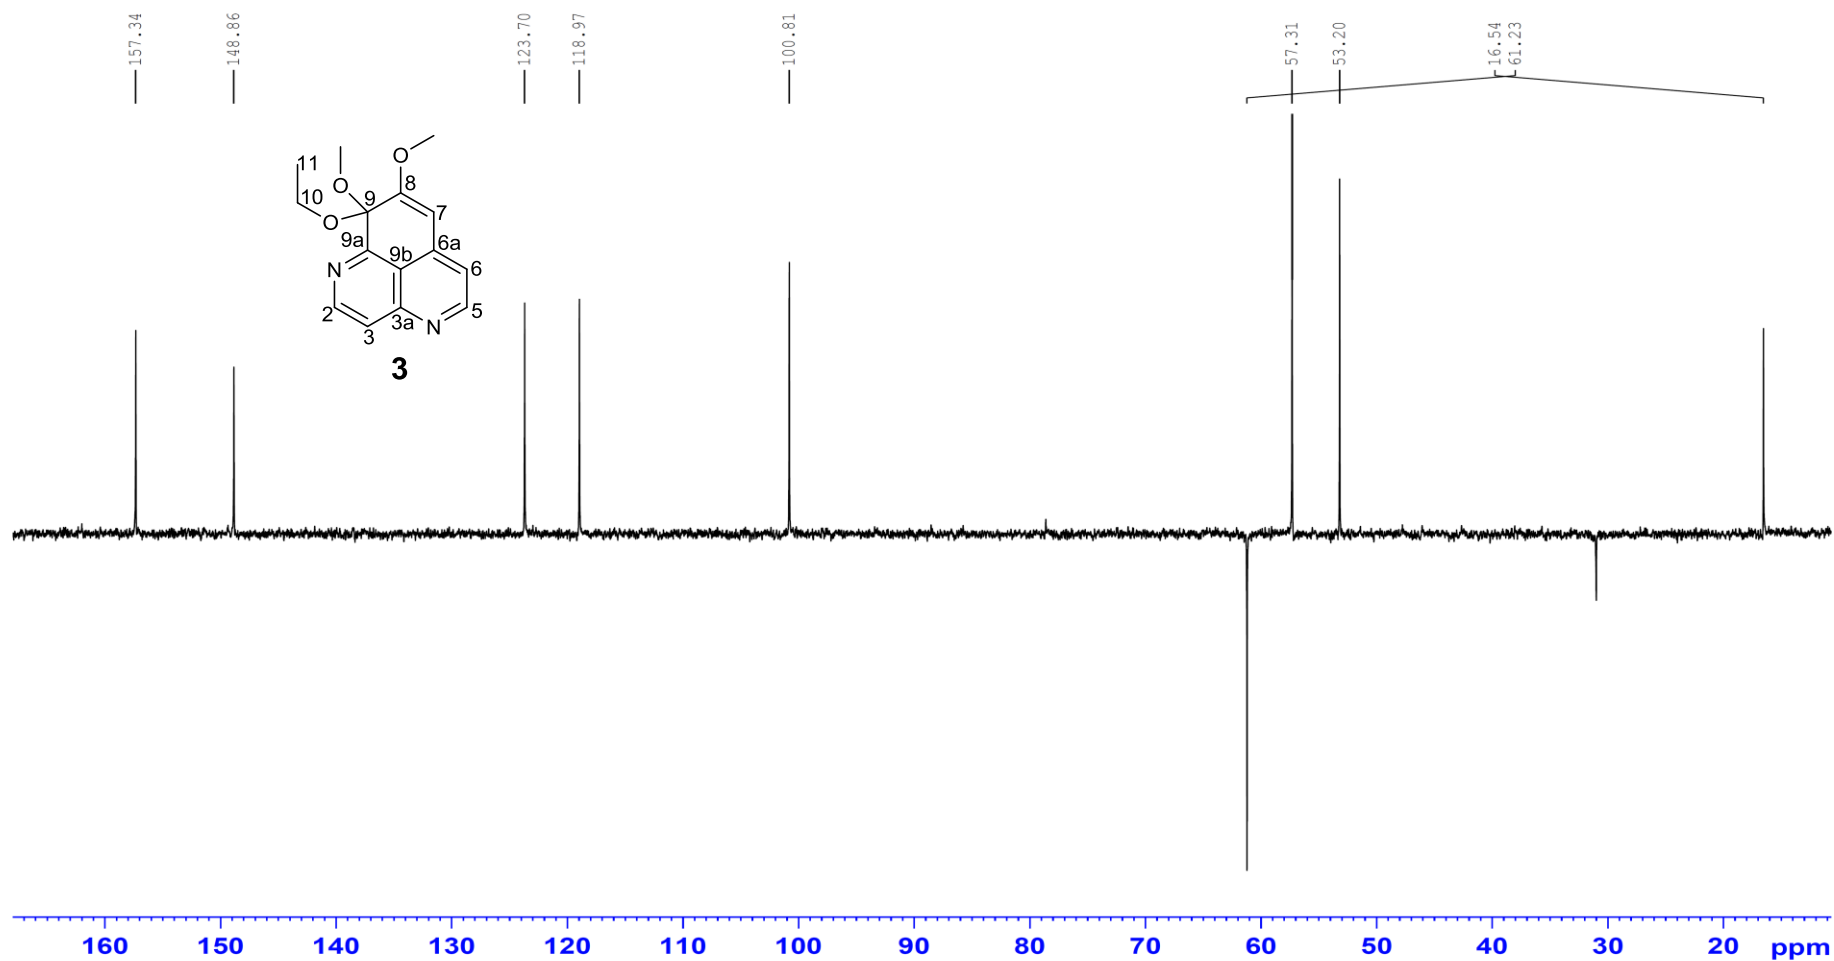

Figure S24. HSQC spectrum of compound **3** in CDCl<sub>3</sub>.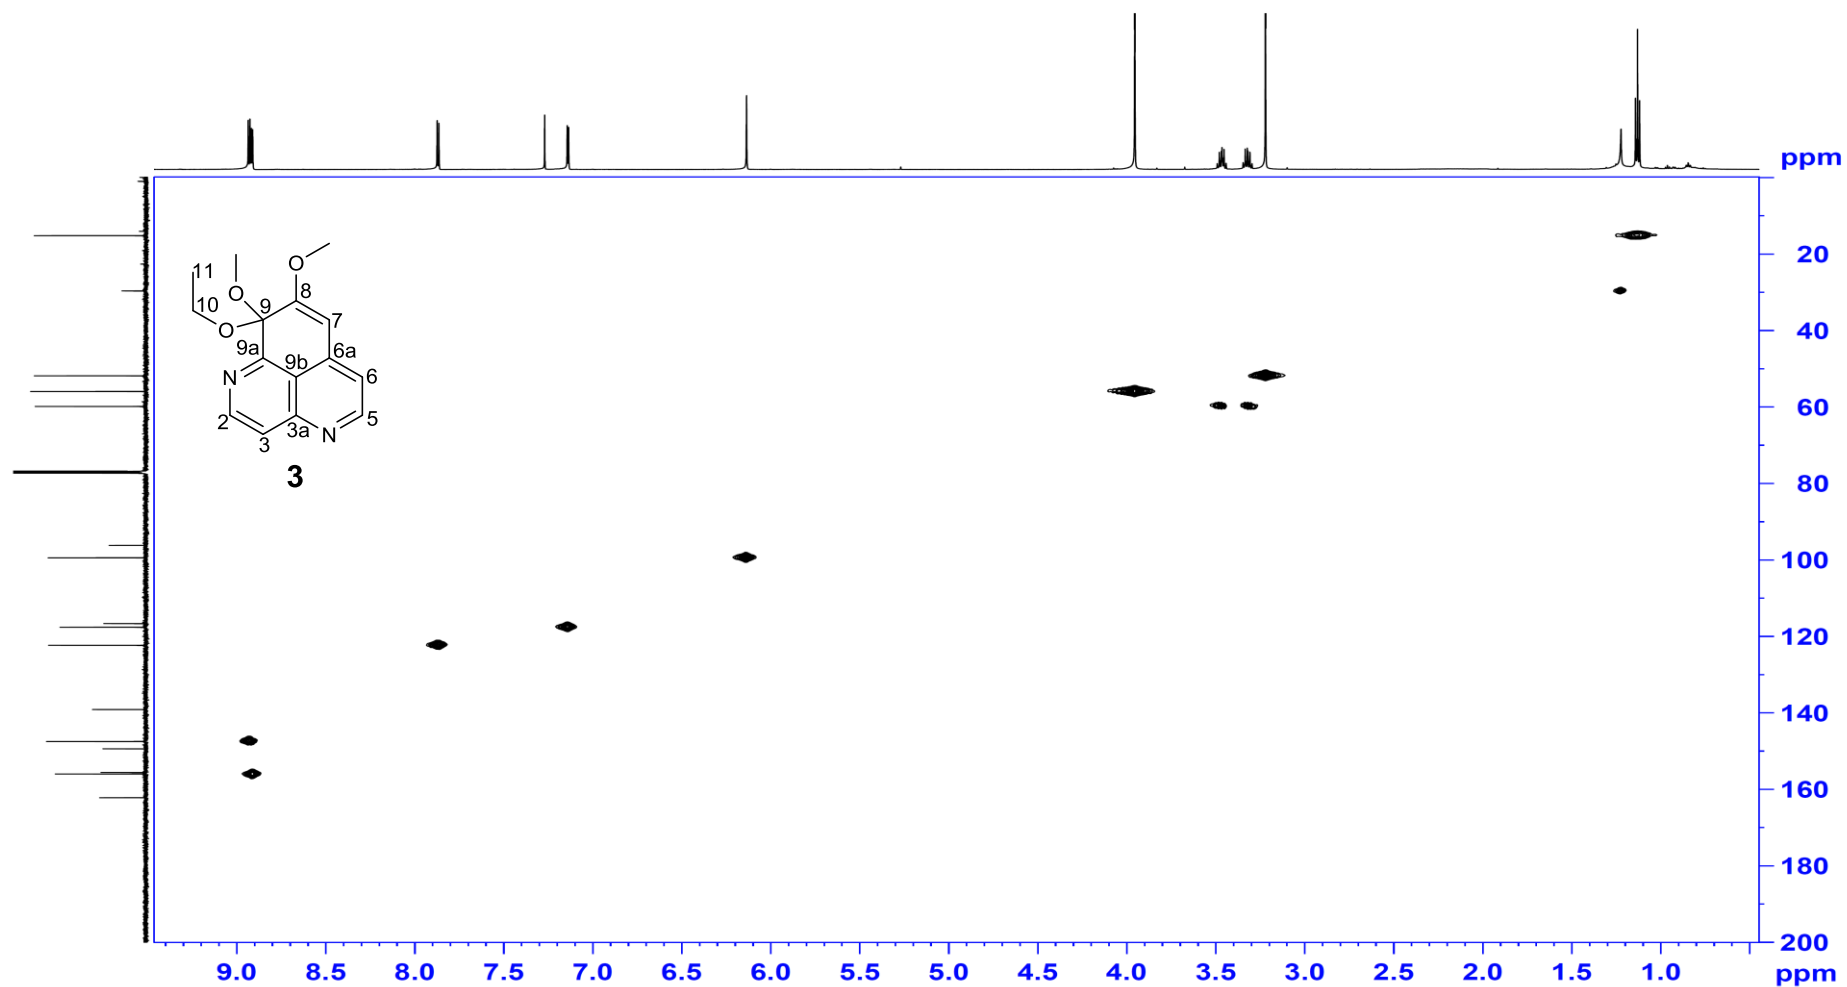

Figure S25. HMBC spectrum of compound **3** in CDCl<sub>3</sub>.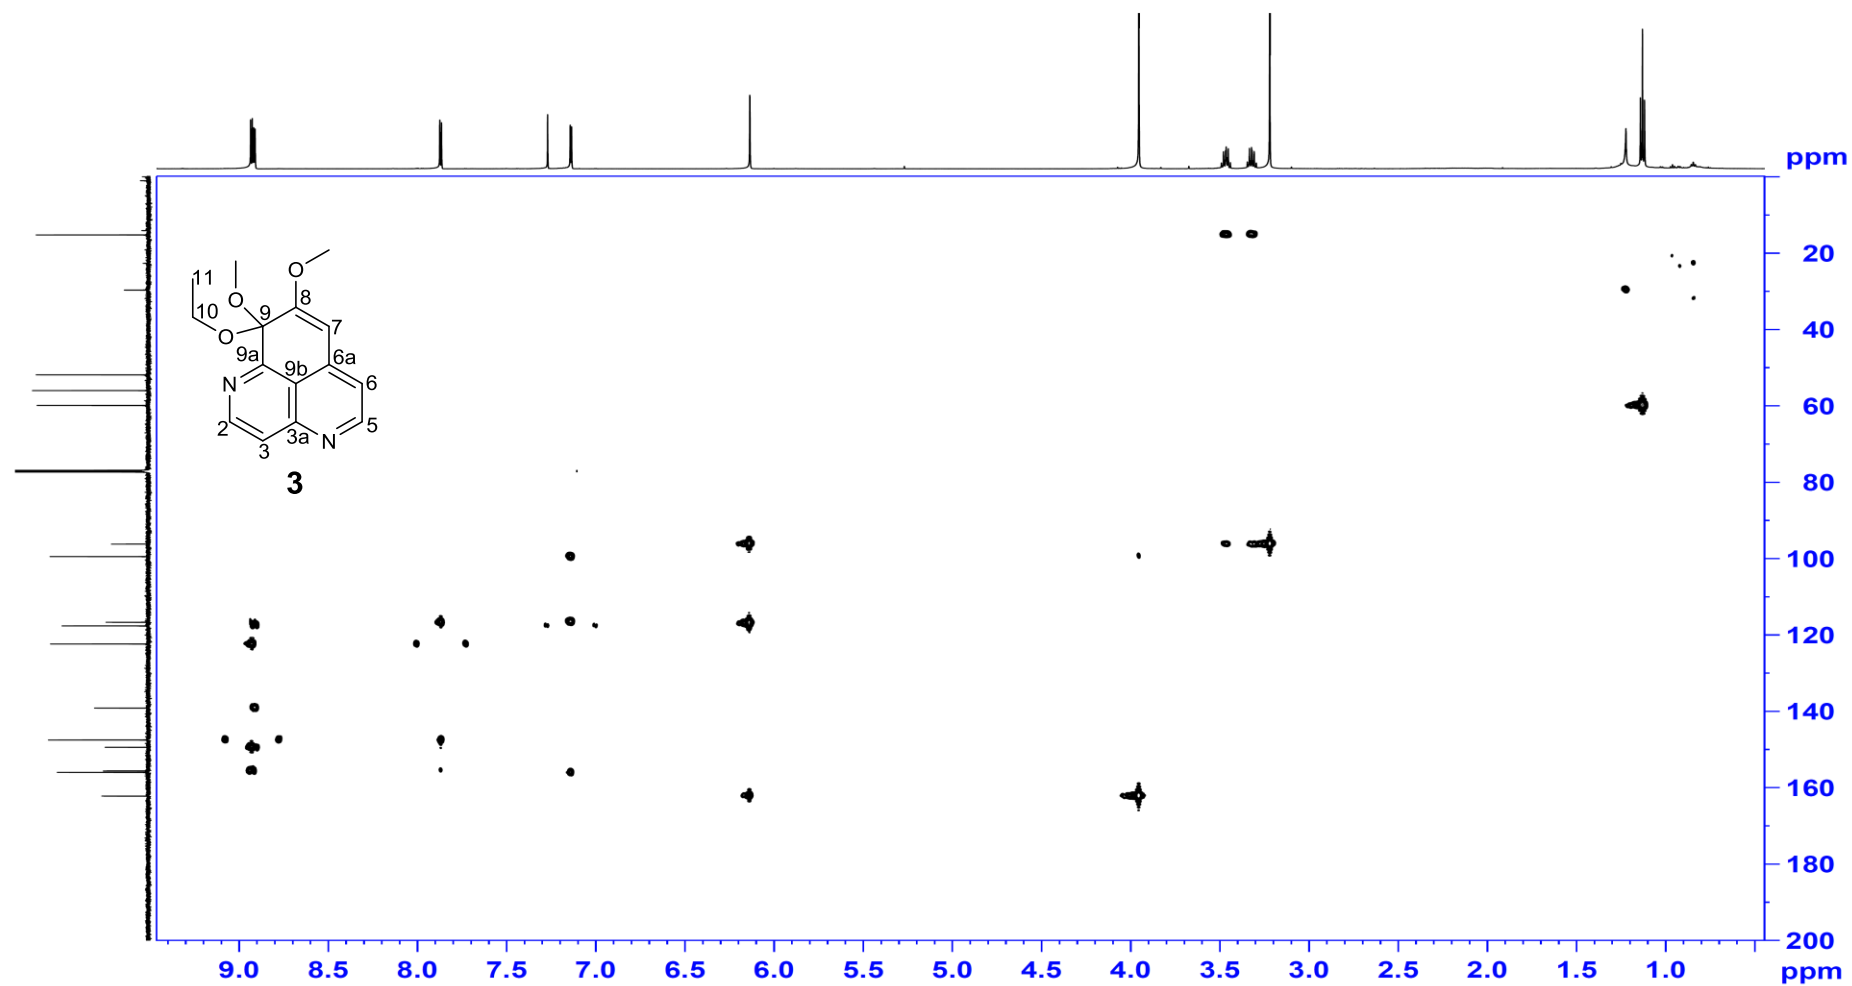

**Figure S26.**  $^1\text{H}$ - $^1\text{H}$  COSY spectrum of compound **3** in  $\text{CDCl}_3$ .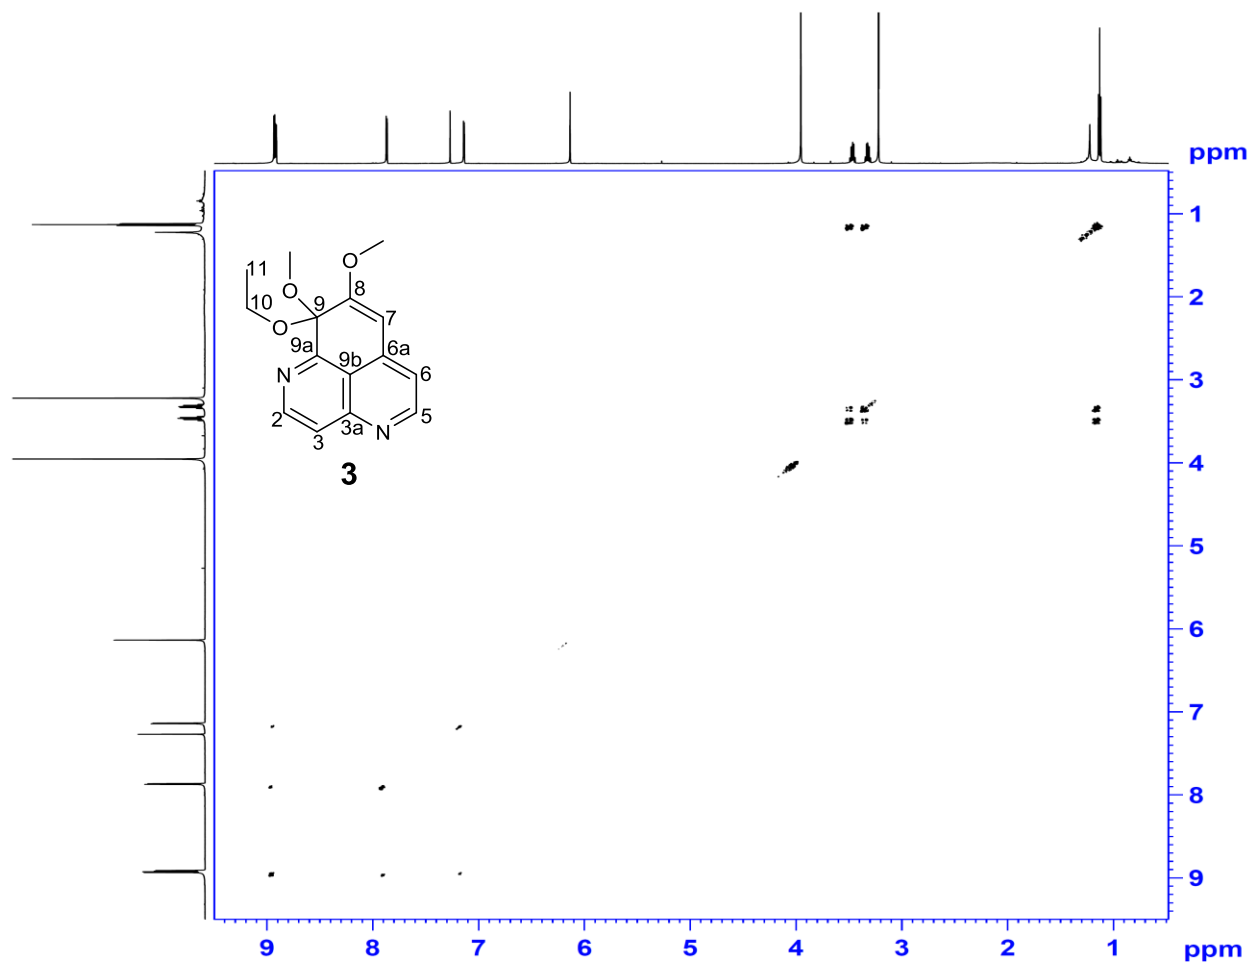

**Figure S27.** NOESY spectrum of compound **3** in CDCl<sub>3</sub>.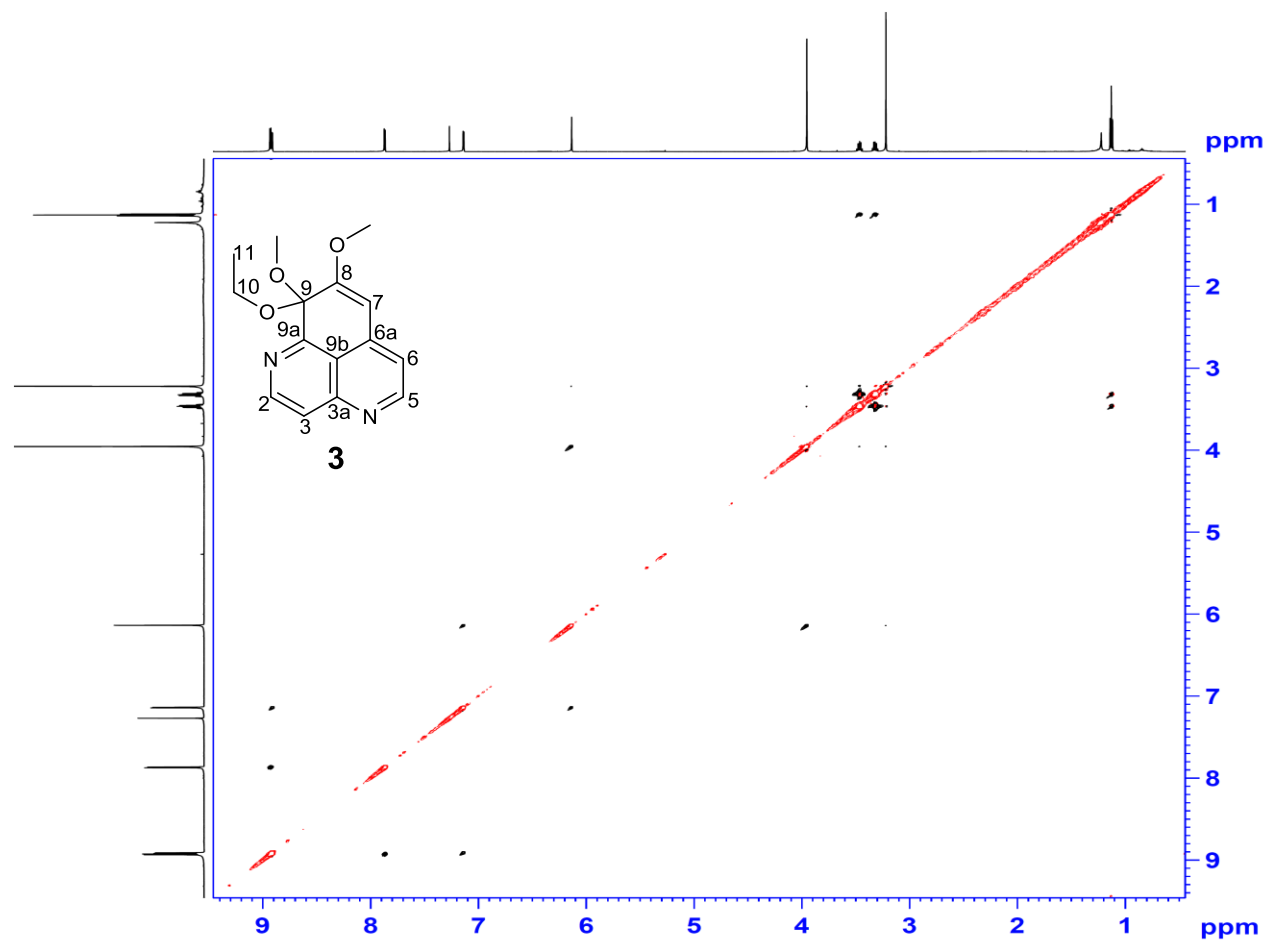

Figure S28. IR spectrum of compound 3.

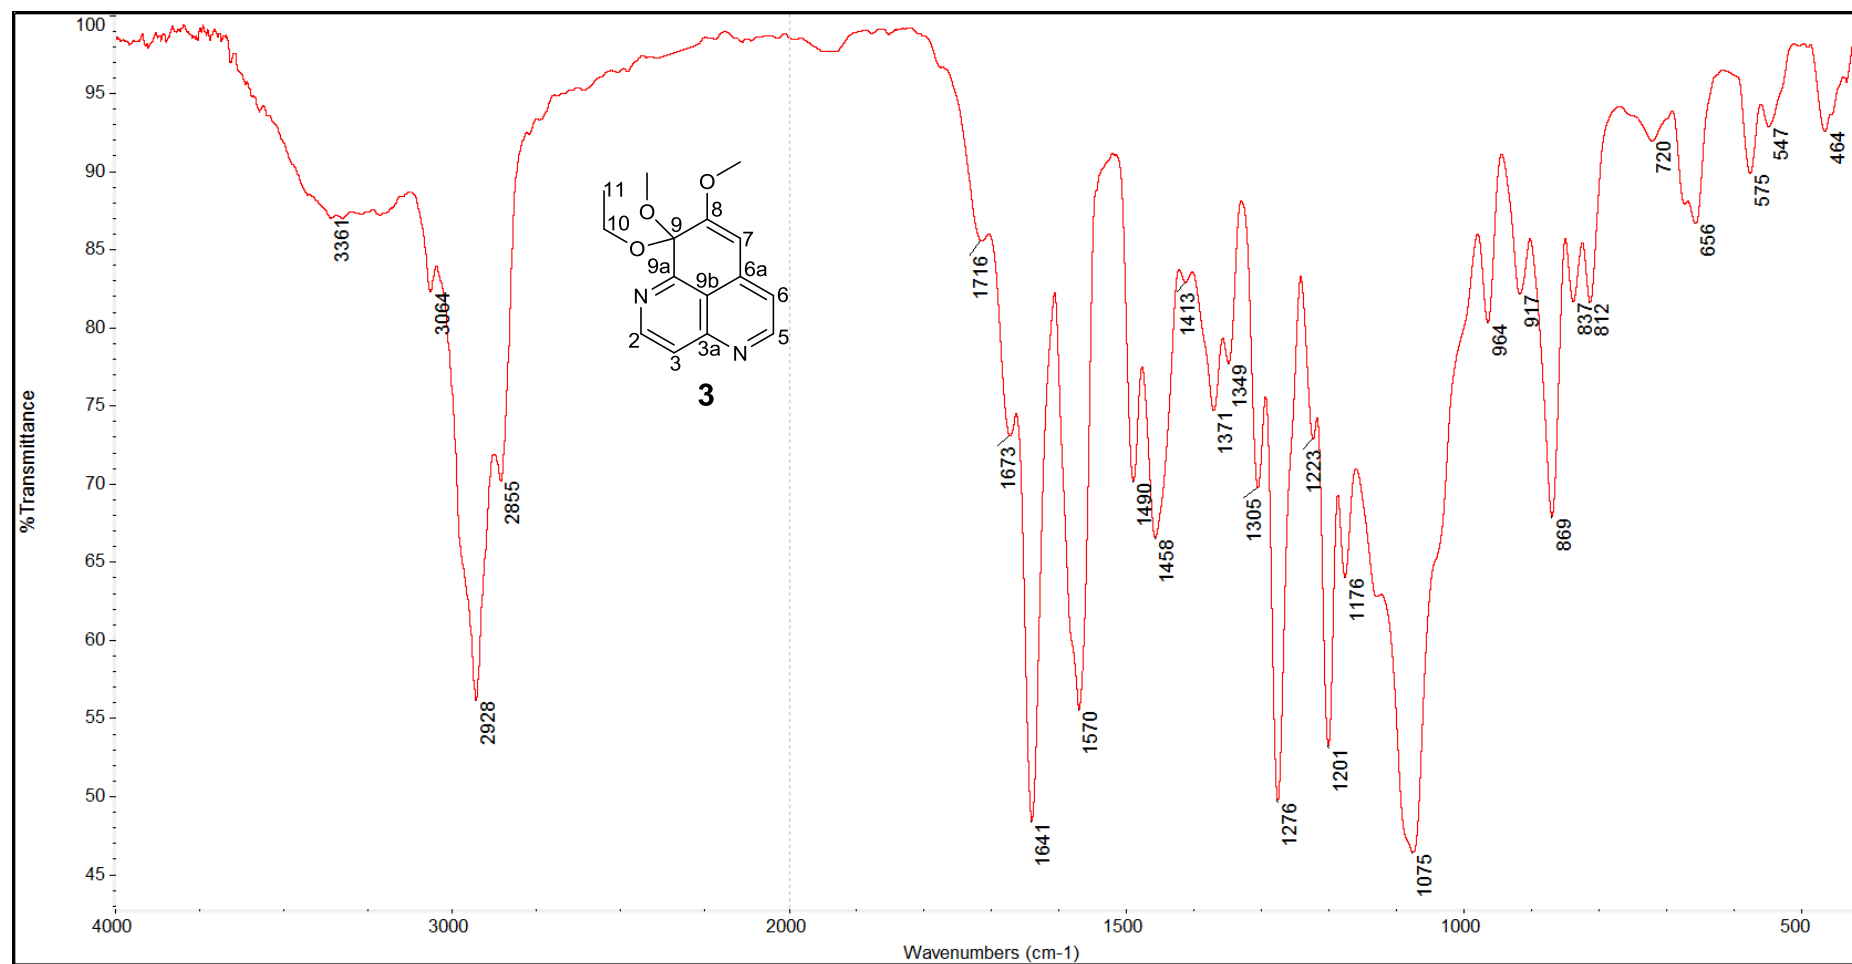

Figure S29. HRESIMS of compound 3.

## Elemental Composition Report

## Multiple Mass Analysis: 2 mass(es) processed

Tolerance = 10.0 PPM / DBE: min = -1.5, max = 50.0

Selected filters: None

Monoisotopic Mass, Even Electron Ions

28 formula(e) evaluated with 1 results within limits (up to 50 closest results for each mass)

Elements Used:

C: 5-15 H: 10-25 N: 0-4 O: 0-5 Na: 1-1

SIPI

M.W.=272

WQ12-149H 45 (1.553) AM (Cen,4, 80.00, Ar,5000.0,298.13,0.70); Sm (SG, 2x1.00); Cm (33:45)

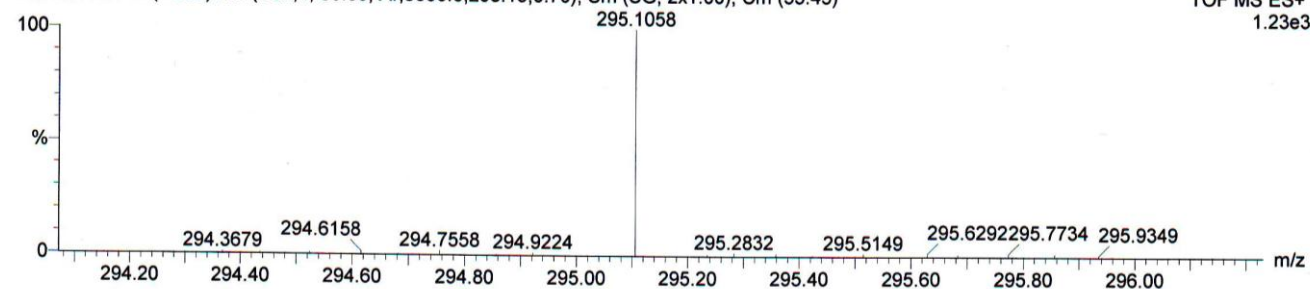

Minimum: 85.00  
Maximum: 100.00

| Mass     | RA     | Calc. Mass | mDa  | PPM  | DBE | i-FIT     | Formula          |
|----------|--------|------------|------|------|-----|-----------|------------------|
| 295.1058 | 100.00 | 295.1059   | -0.1 | -0.3 | 8.5 | 5546620.0 | C15 H16 N2 O3 Na |

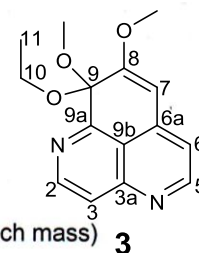

**Figure S30.** UV spectrum of compound **3**.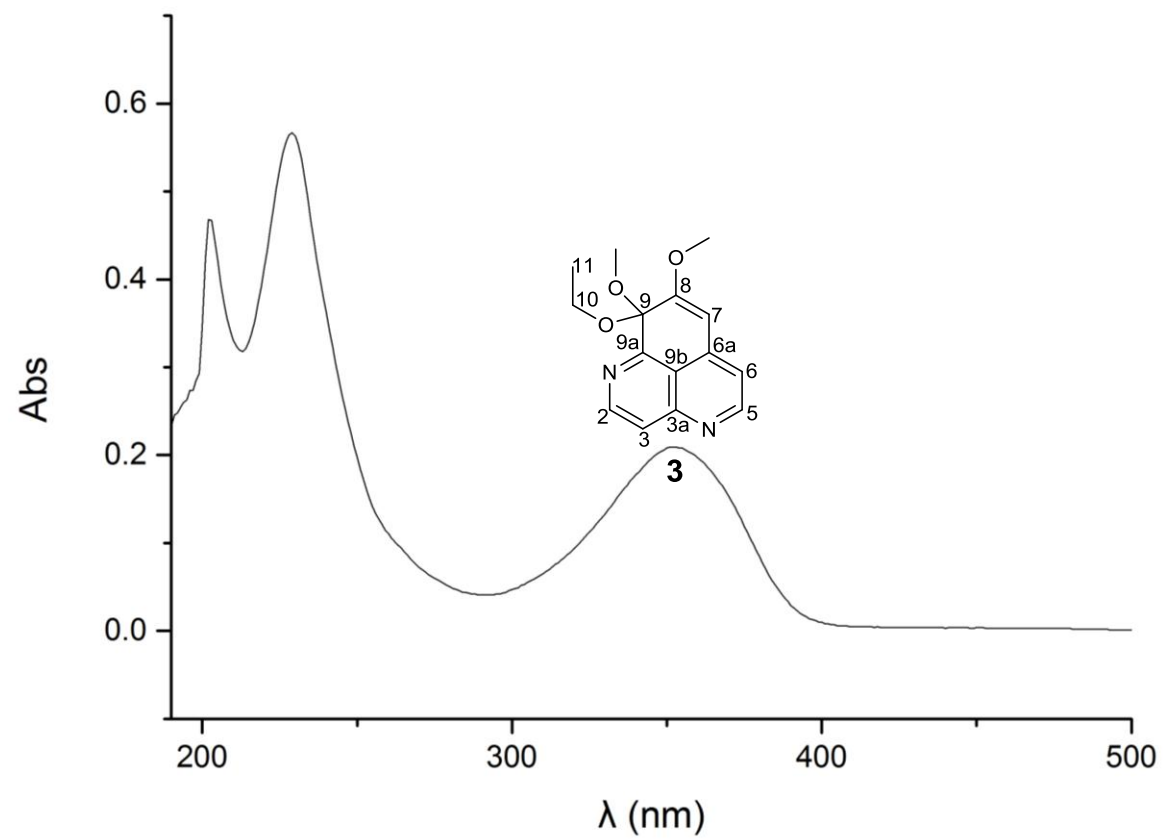

Figure S31.  $^1\text{H}$  NMR spectrum of compound **4** in  $\text{CDCl}_3$ .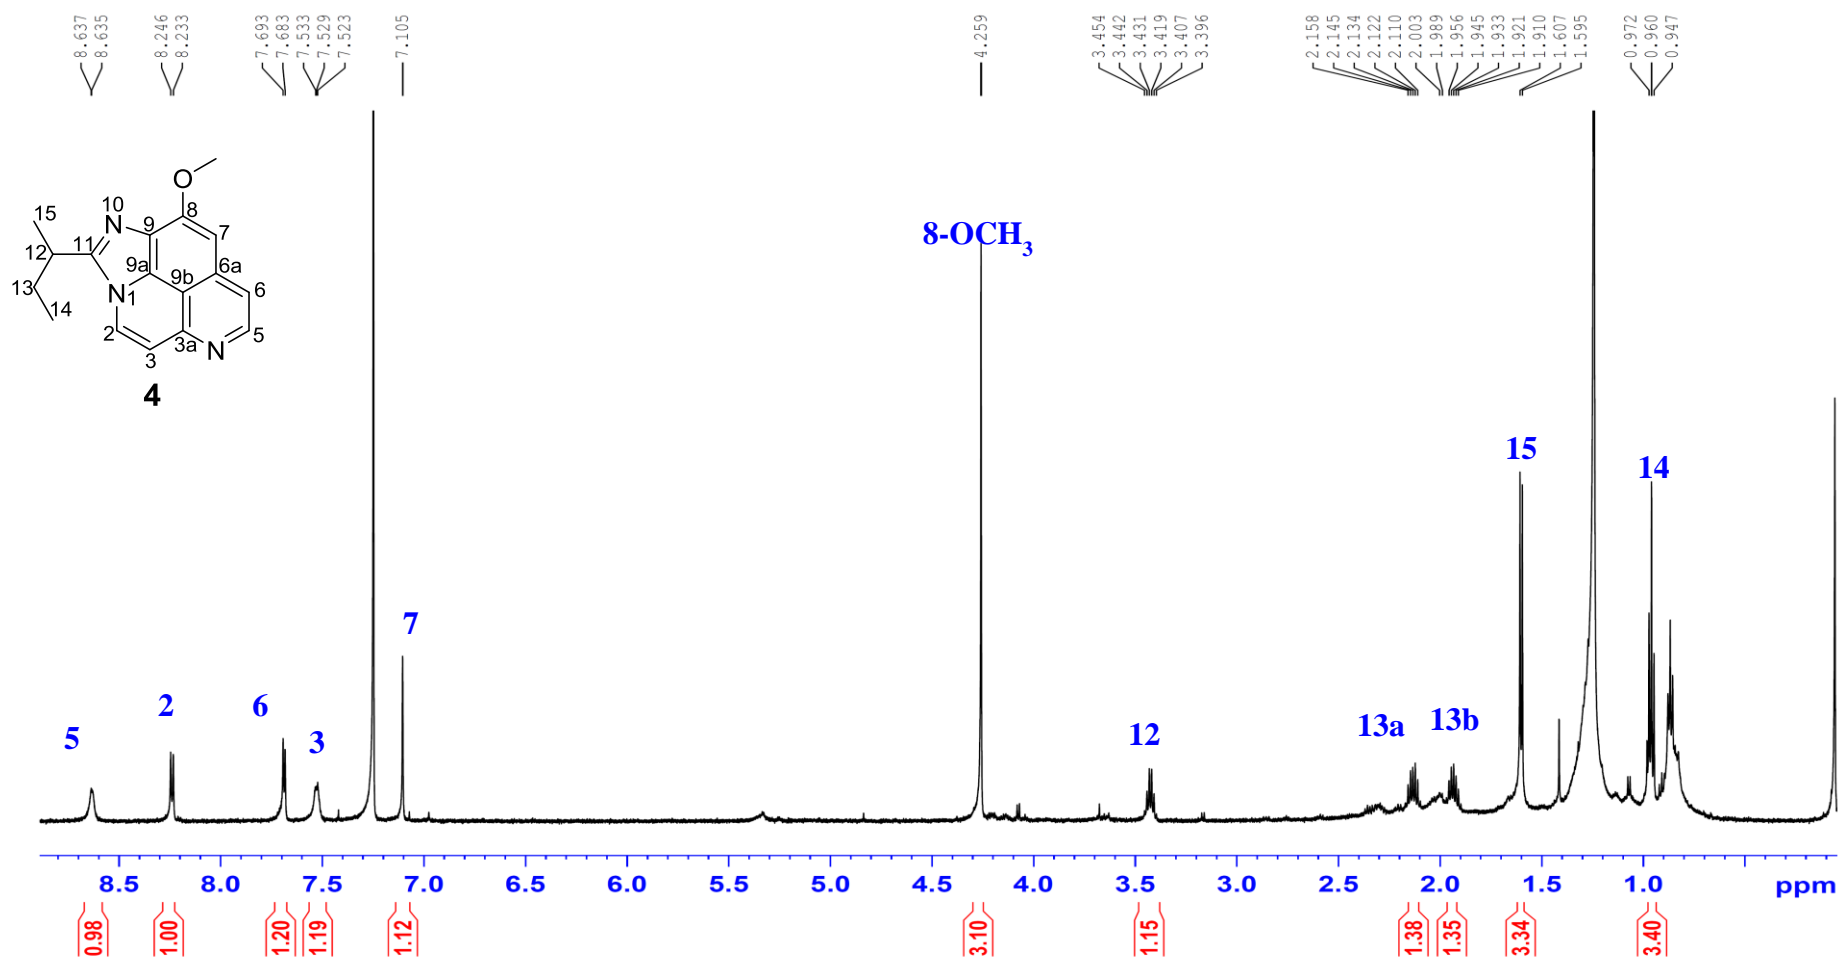

**Figure S32.**  $^{13}\text{C}$  NMR spectrum of compound **4** in  $\text{CDCl}_3$ .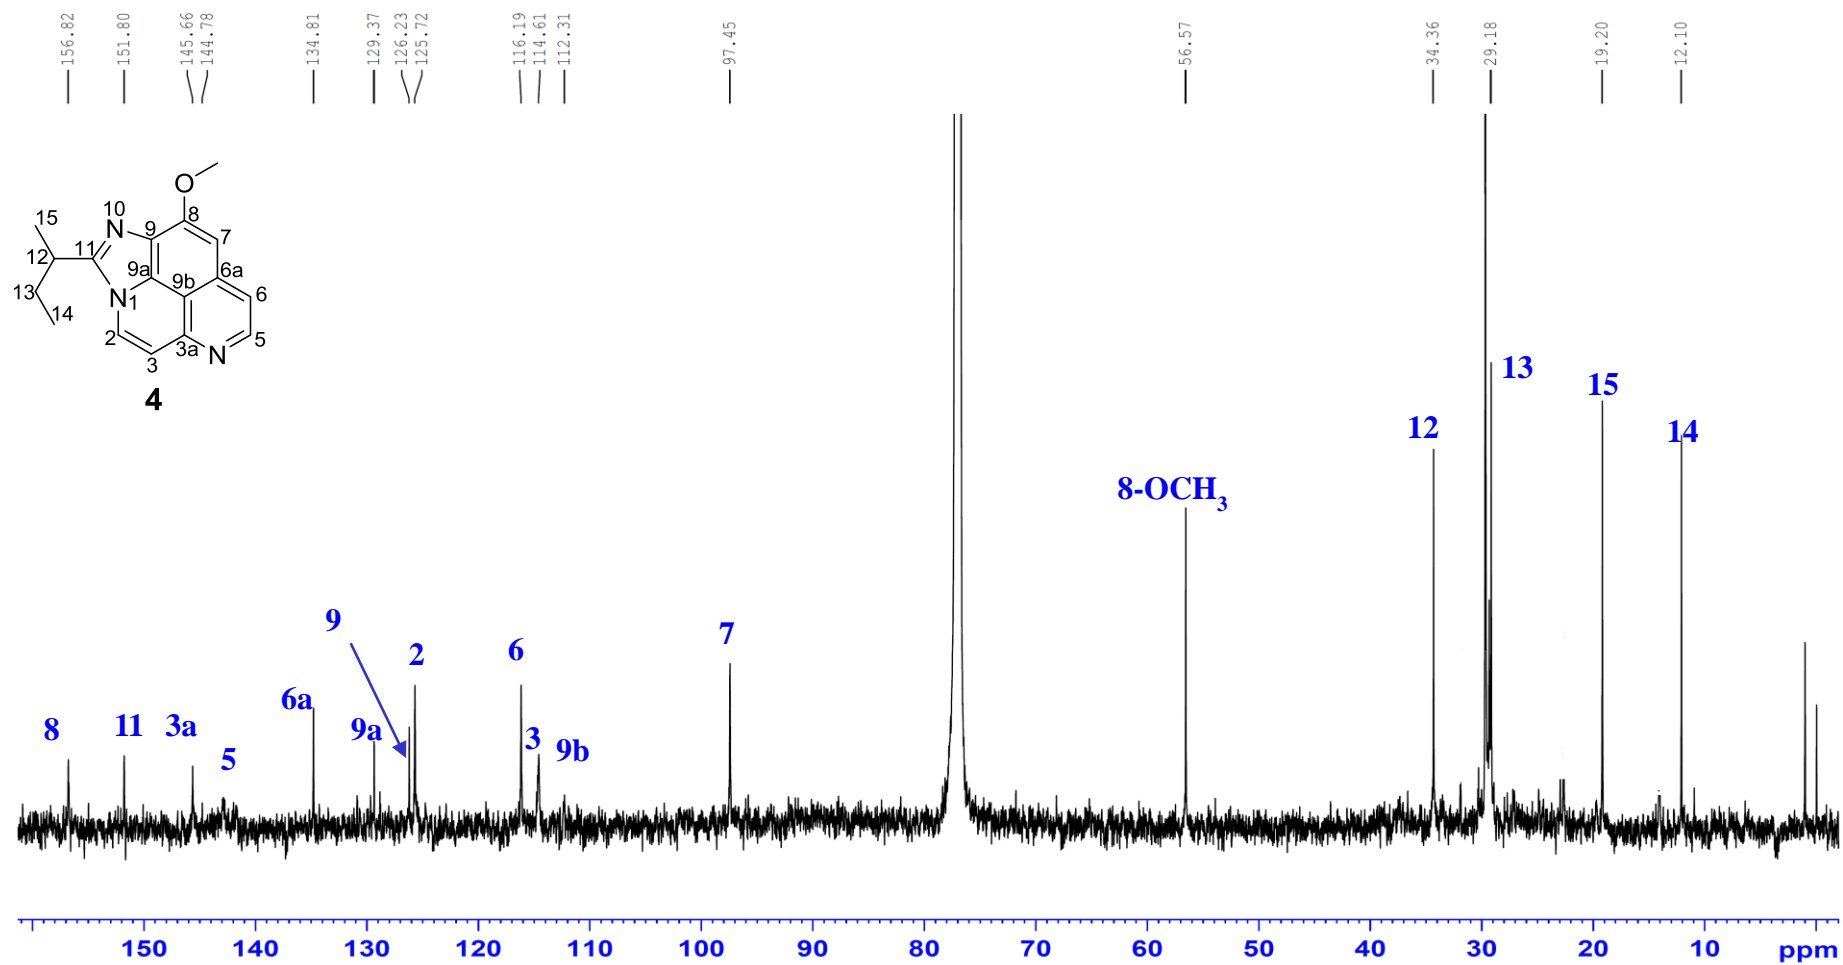

**Figure S33.** DEPT135 Spectrum of compound **4** in CDCl<sub>3</sub>.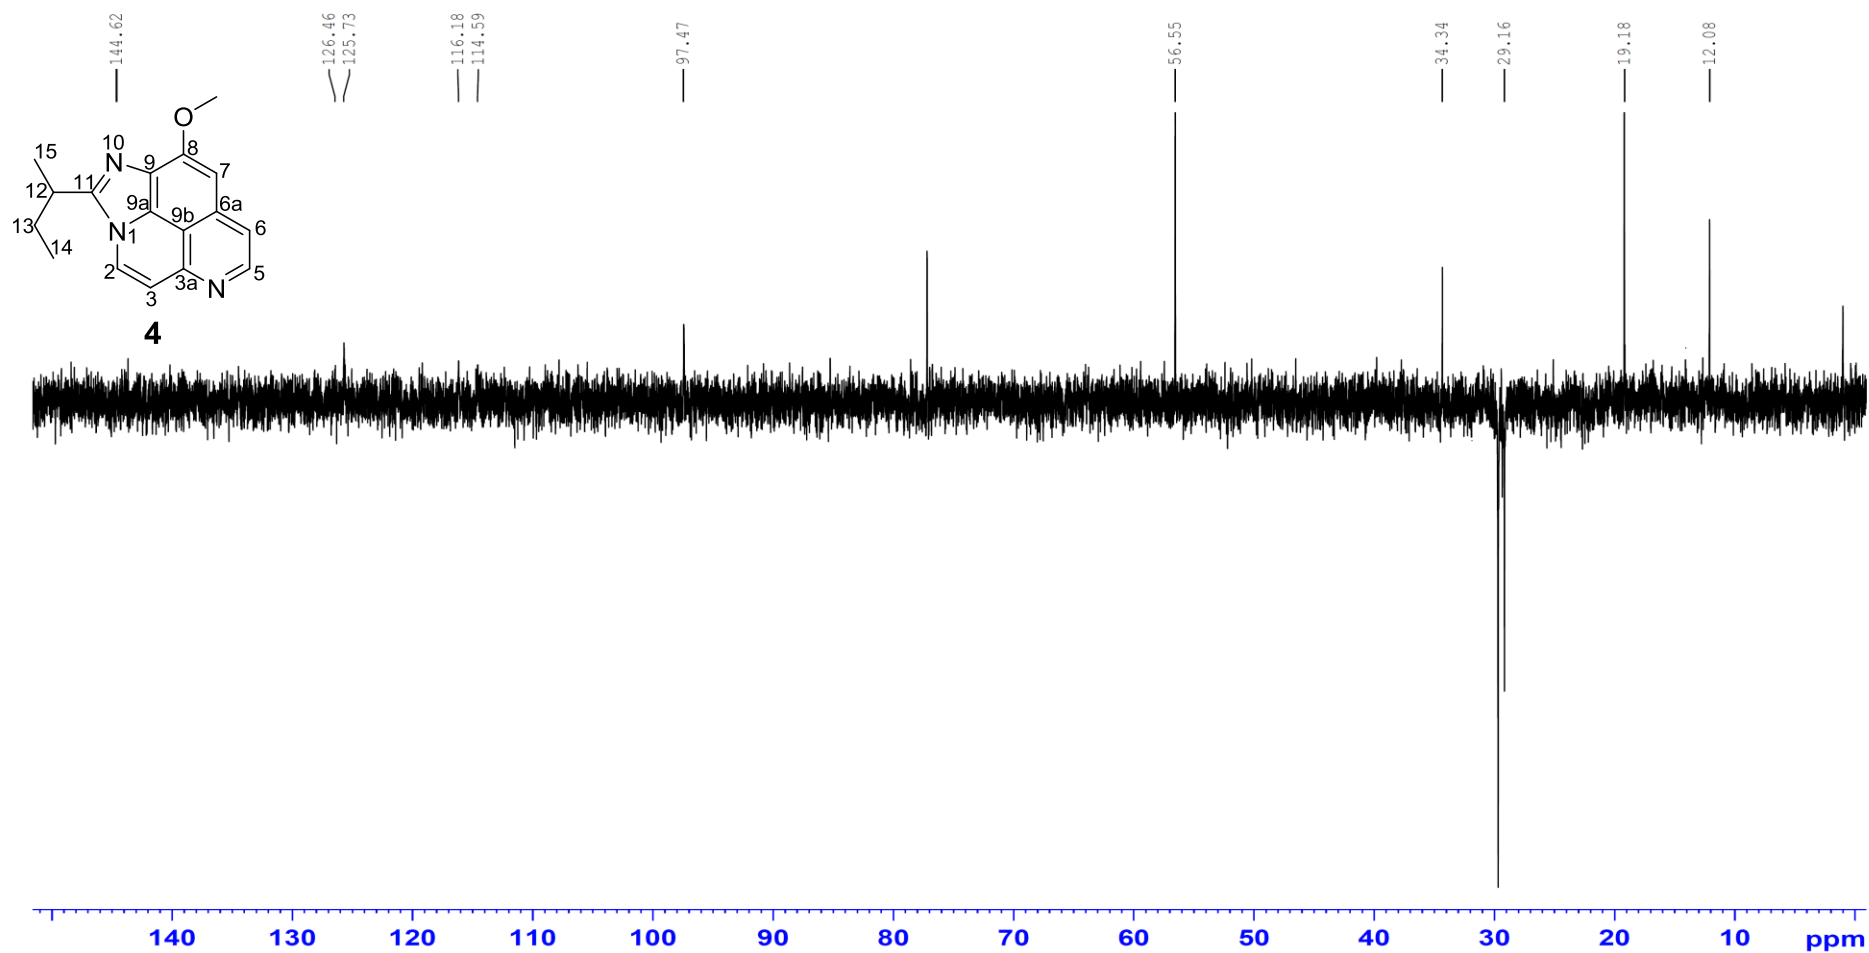

Figure S34. HSQC spectrum of compound **4** in CDCl<sub>3</sub>.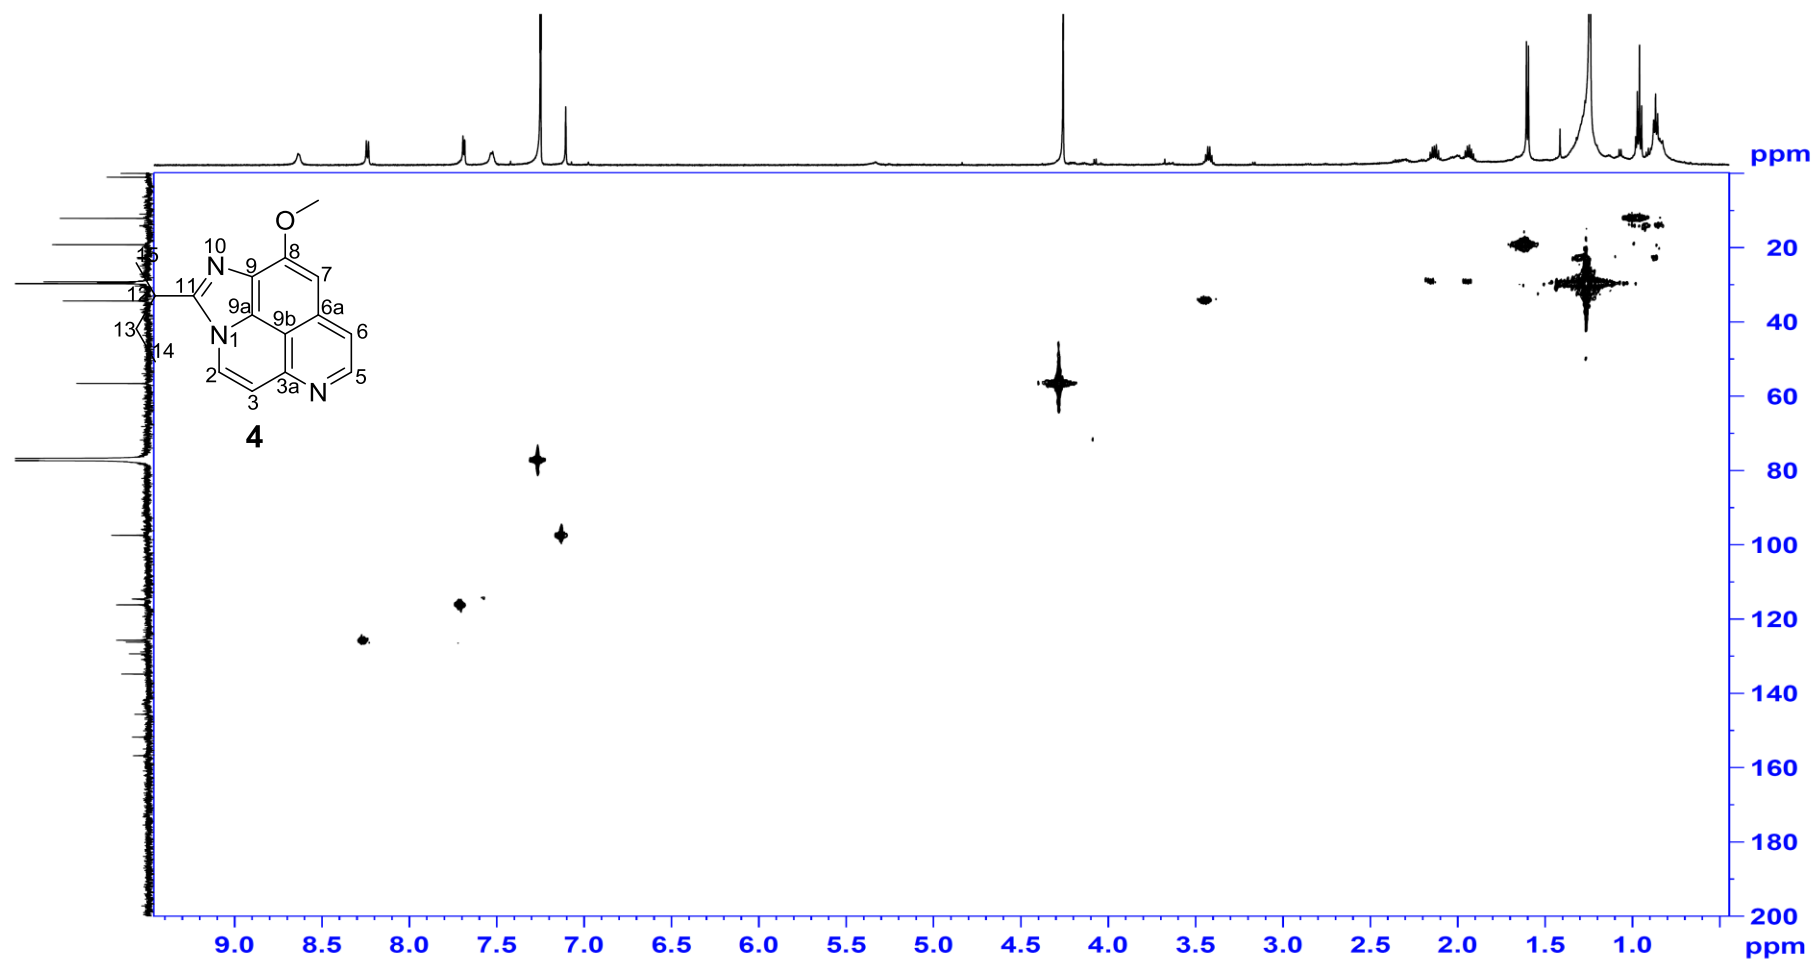

Figure S35. HMBC spectrum of compound **4** in CDCl<sub>3</sub>.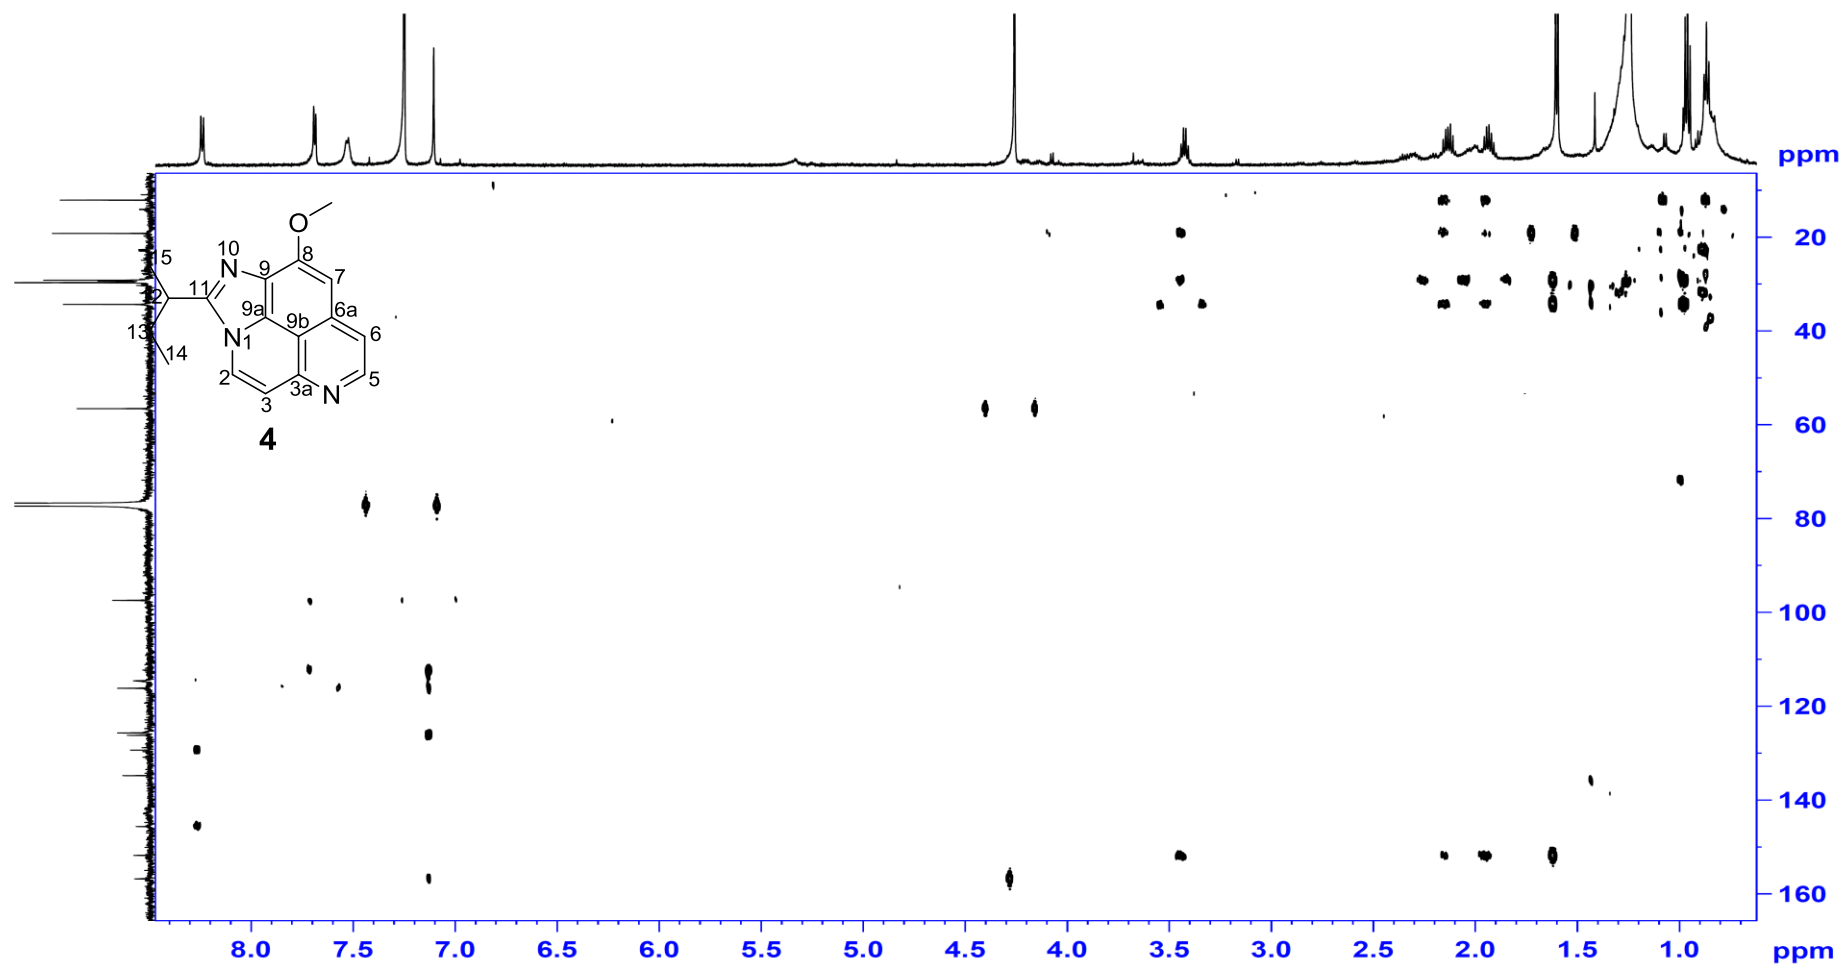

**Figure S36.**  $^1\text{H}$ - $^1\text{H}$  COSY spectrum of compound **4** in  $\text{CDCl}_3$ .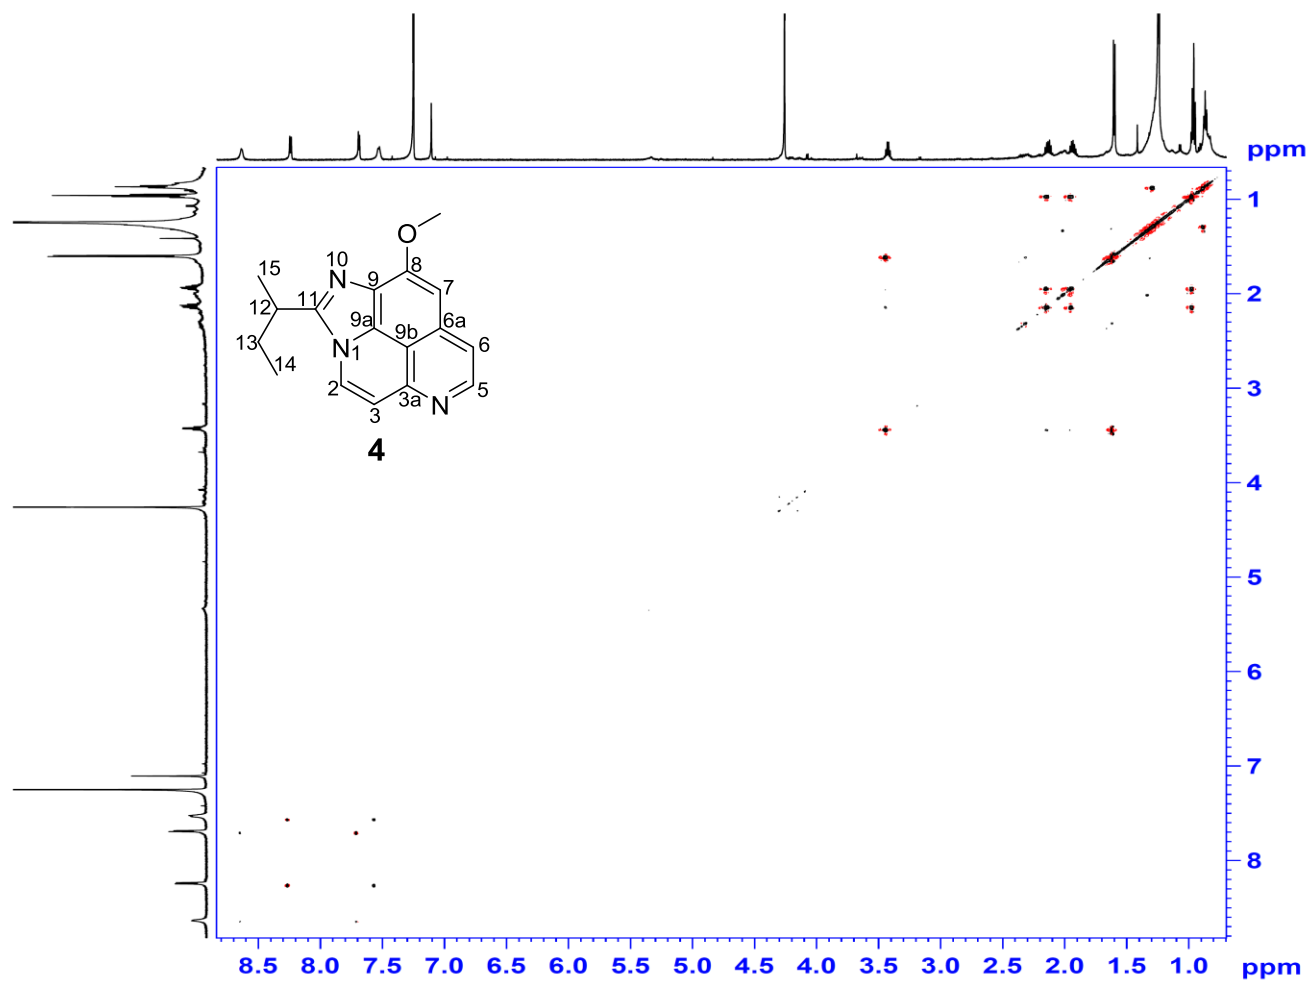

**Figure S37.** NOESY spectrum of compound **4** in CDCl<sub>3</sub>.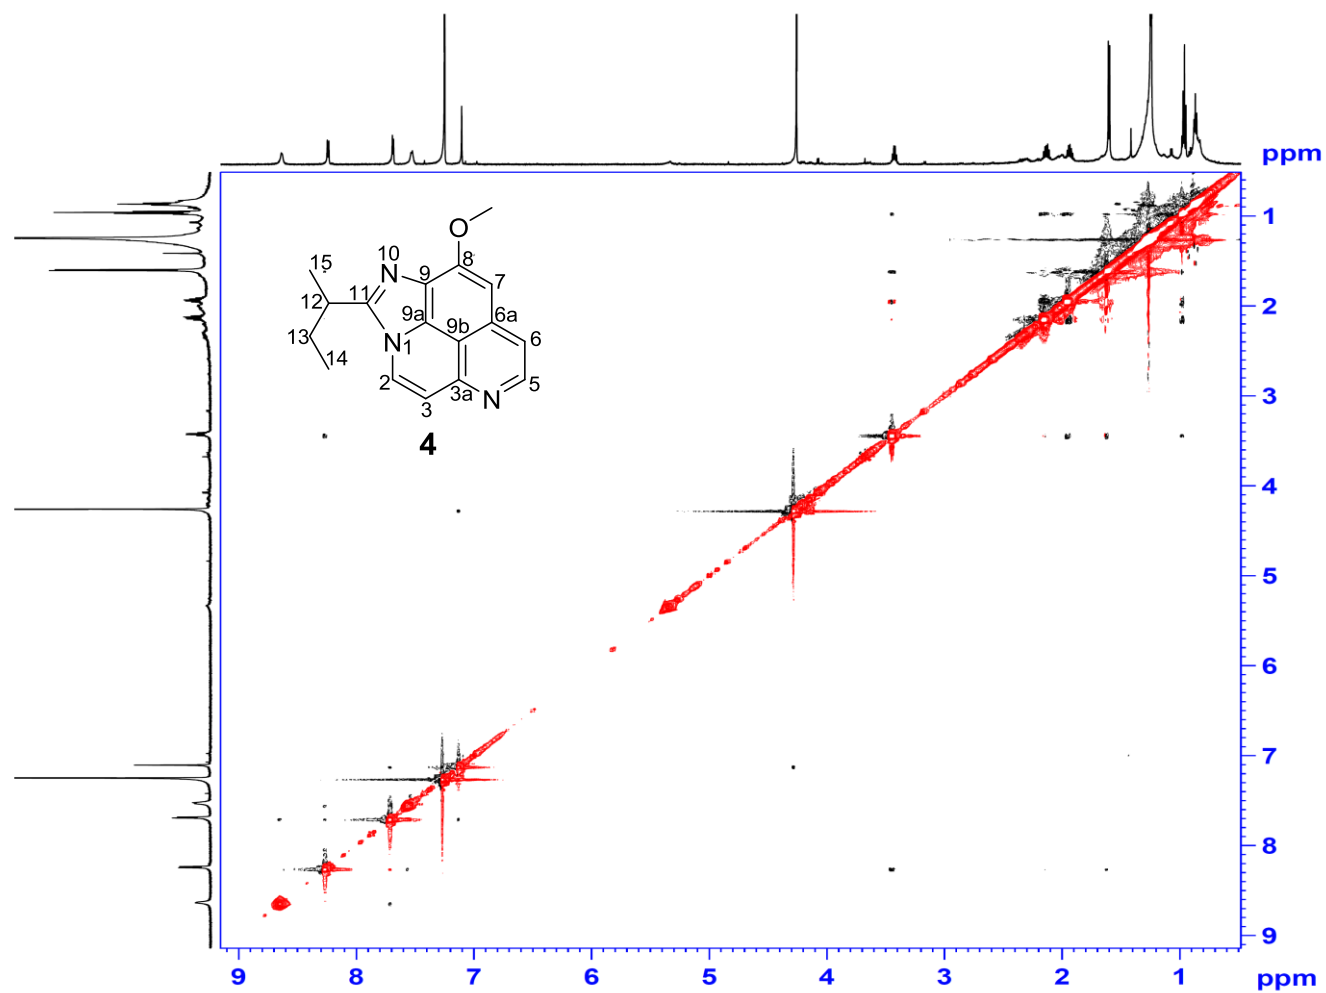

Figure S38. IR spectrum of compound 4.

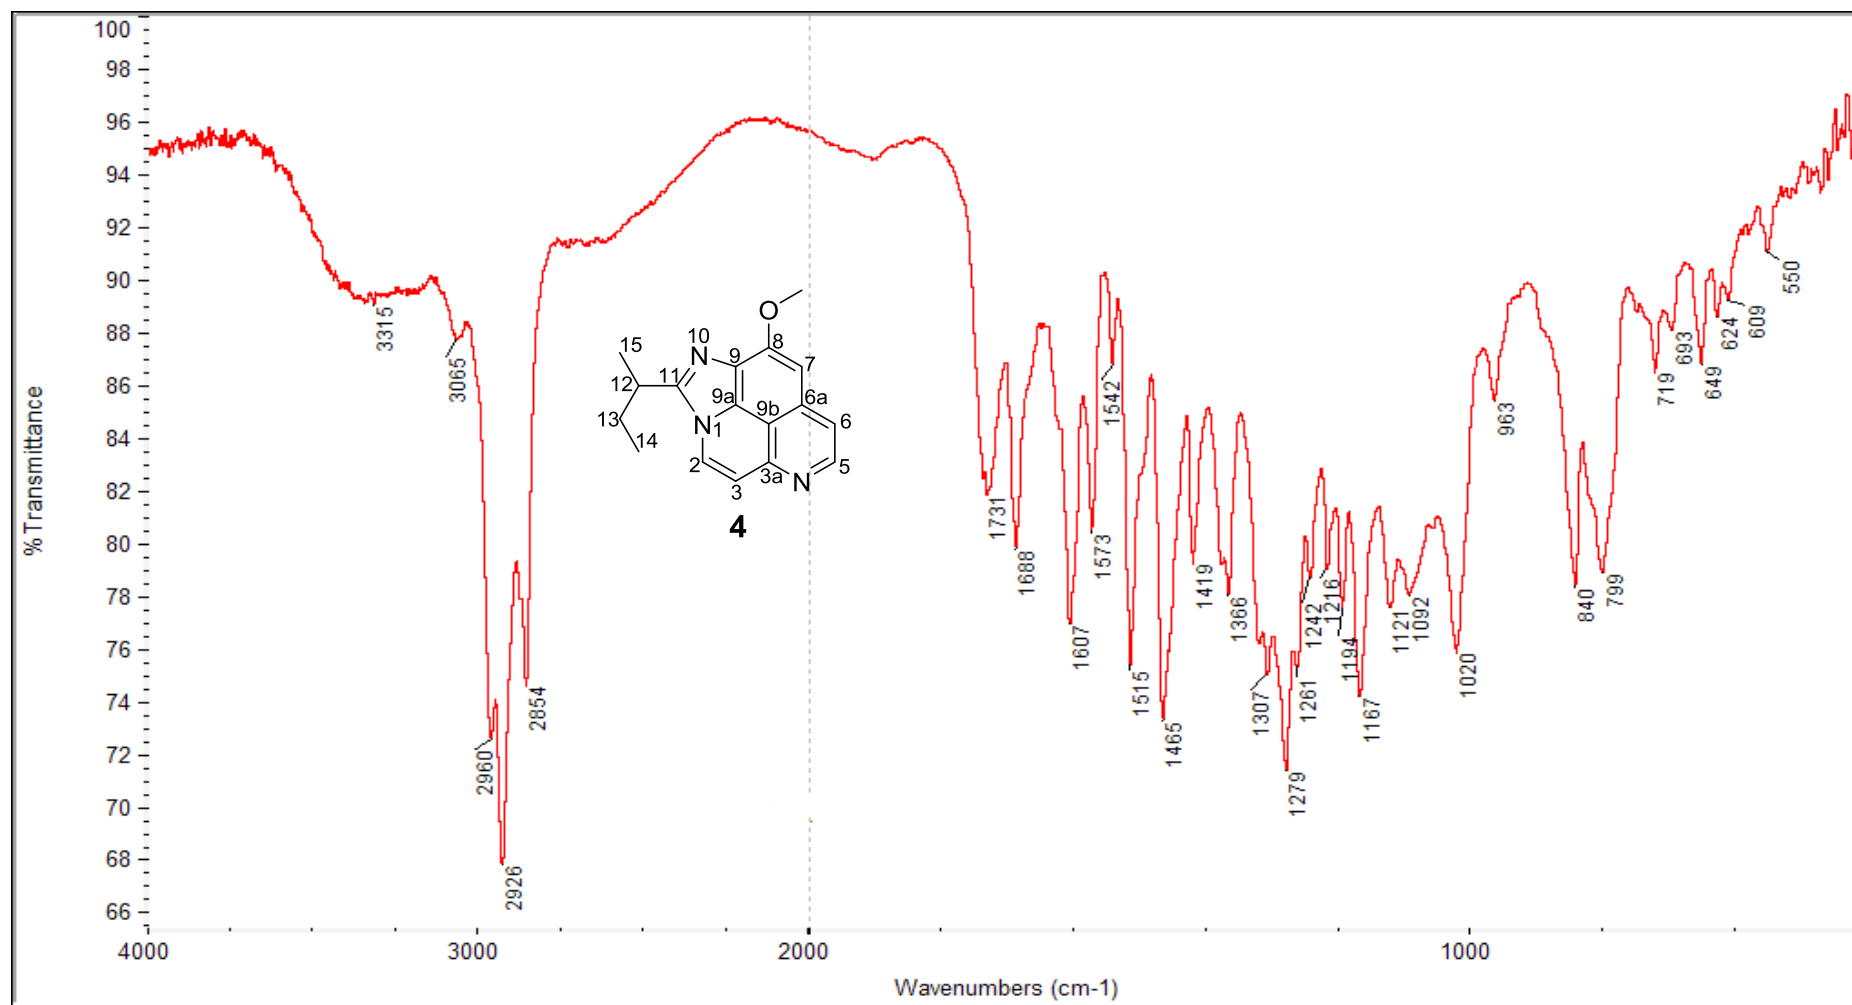

Figure S39. HRESIMS of compound 4.

## Elemental Composition Report

Tolerance = 5.0 PPM / DBE: min = -1.5, max = 50.0  
 Selected filters: None

Monoisotopic Mass, Even Electron Ions

12 formula(e) evaluated with 1 results within limits (up to 50 closest results for each mass)

Elements Used:

C: 5-20 H: 5-20 N: 1-3 O: 1-3

SIPI

M.W.=279

Q-ToF micro  
 YA019

31-Oct-2013,15:52:17

WQ13-259H1 55 (1.894) AM (Cen,4, 80.00, Ar,5000.0,268.14,0.70); Sm (Mn, 2x3.00); Cm (49:66)

TOF MS ES+  
 2.42e3

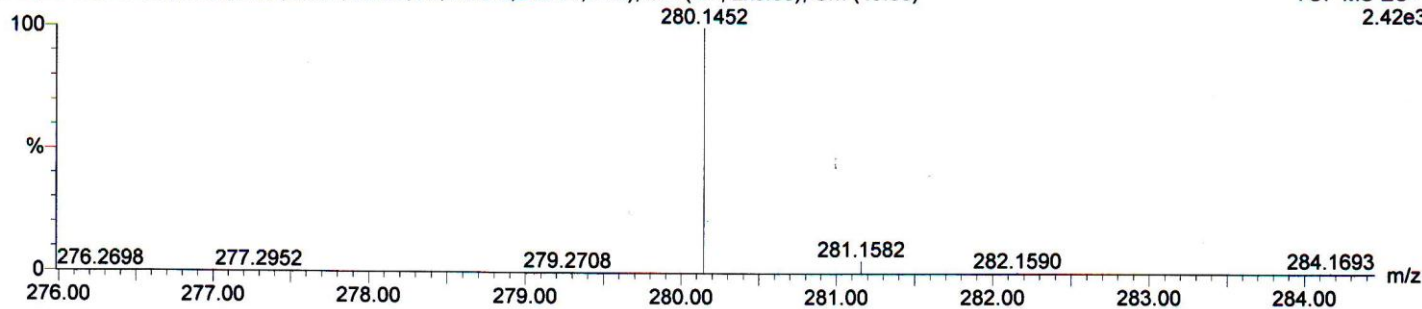

| Minimum: | 75.00  |            |     |     | -1.5 |       |              |
|----------|--------|------------|-----|-----|------|-------|--------------|
| Maximum: | 100.00 |            | 5.0 | 5.0 | 50.0 |       |              |
| Mass     | RA     | Calc. Mass | mDa | PPM | DBE  | i-FIT | Formula      |
| 280.1452 | 100.00 | 280.1450   | 0.2 | 0.7 | 10.5 | 366.1 | C17 H18 N3 O |

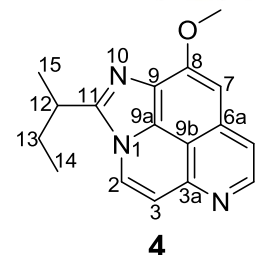

Page 1

**Figure S40.** UV spectrum of compound **4**.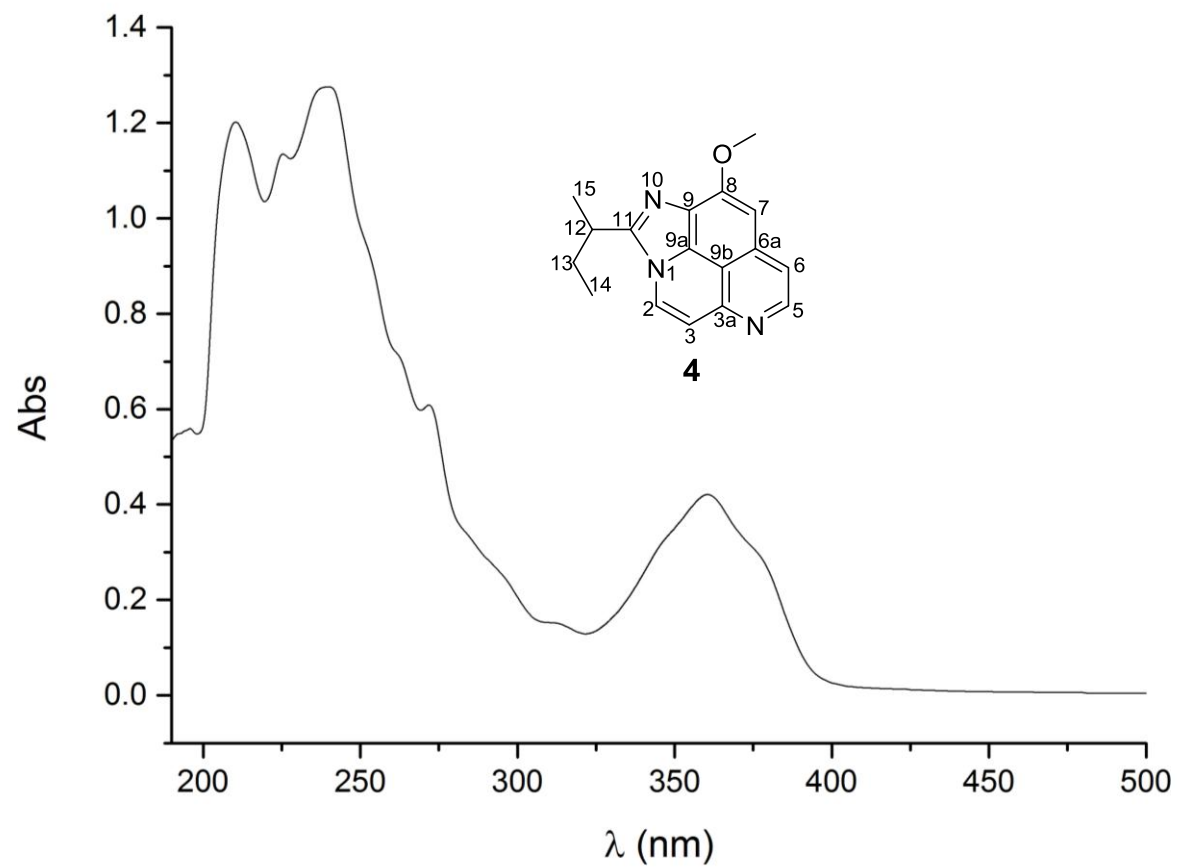

**Figure S41.**  $^1\text{H}$  NMR spectrum of compound **5** in  $\text{CDCl}_3$ .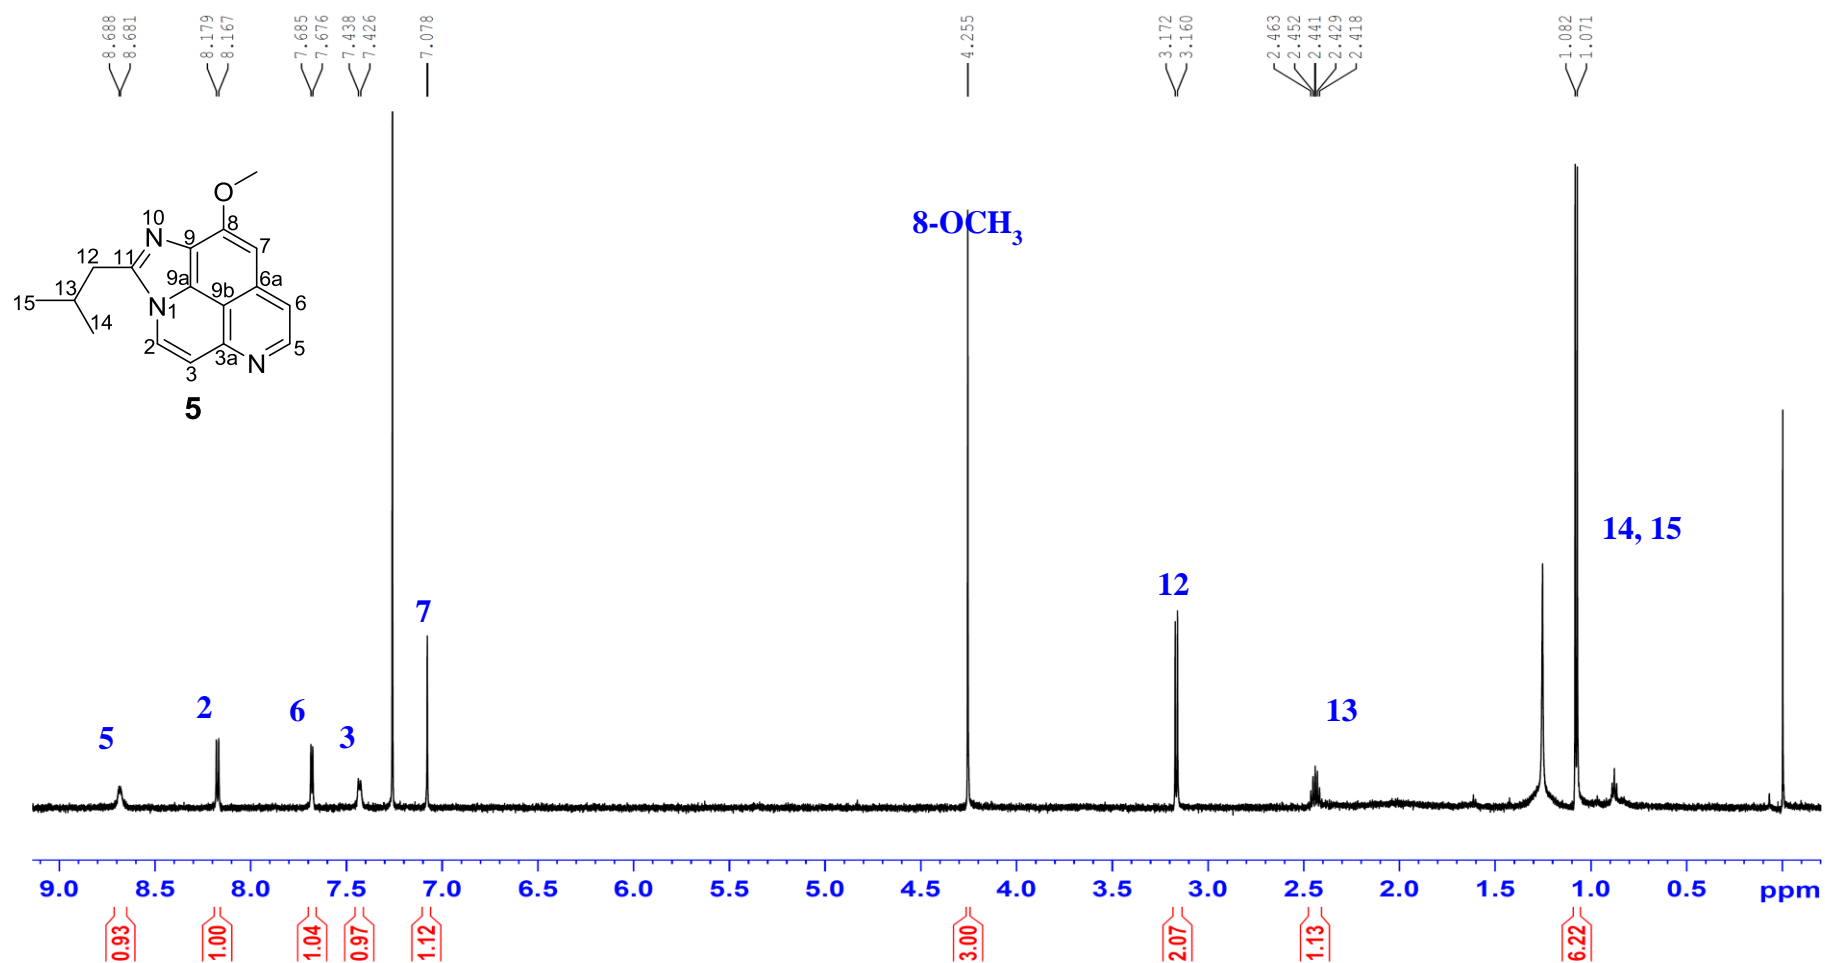

**Figure S42.**  $^{13}\text{C}$  NMR spectrum of compound **5** in  $\text{CDCl}_3$ .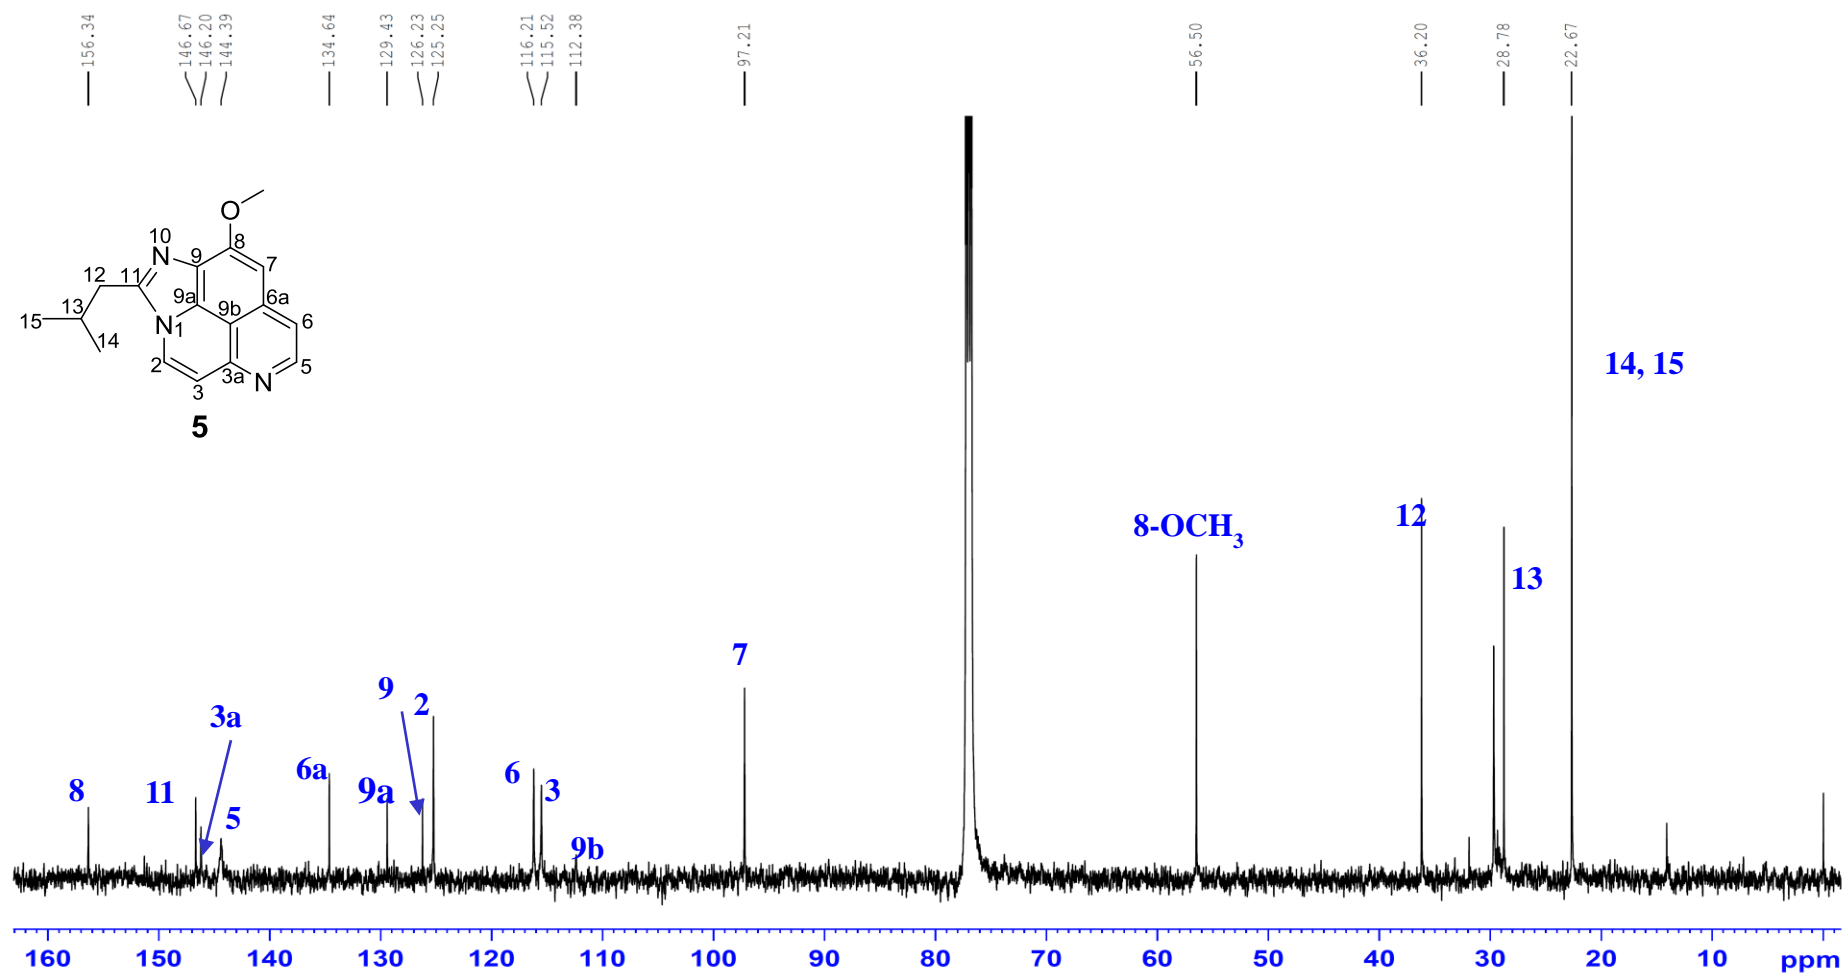

**Figure S43.** DEPT135 Spectrum of compound **5** in CDCl<sub>3</sub>.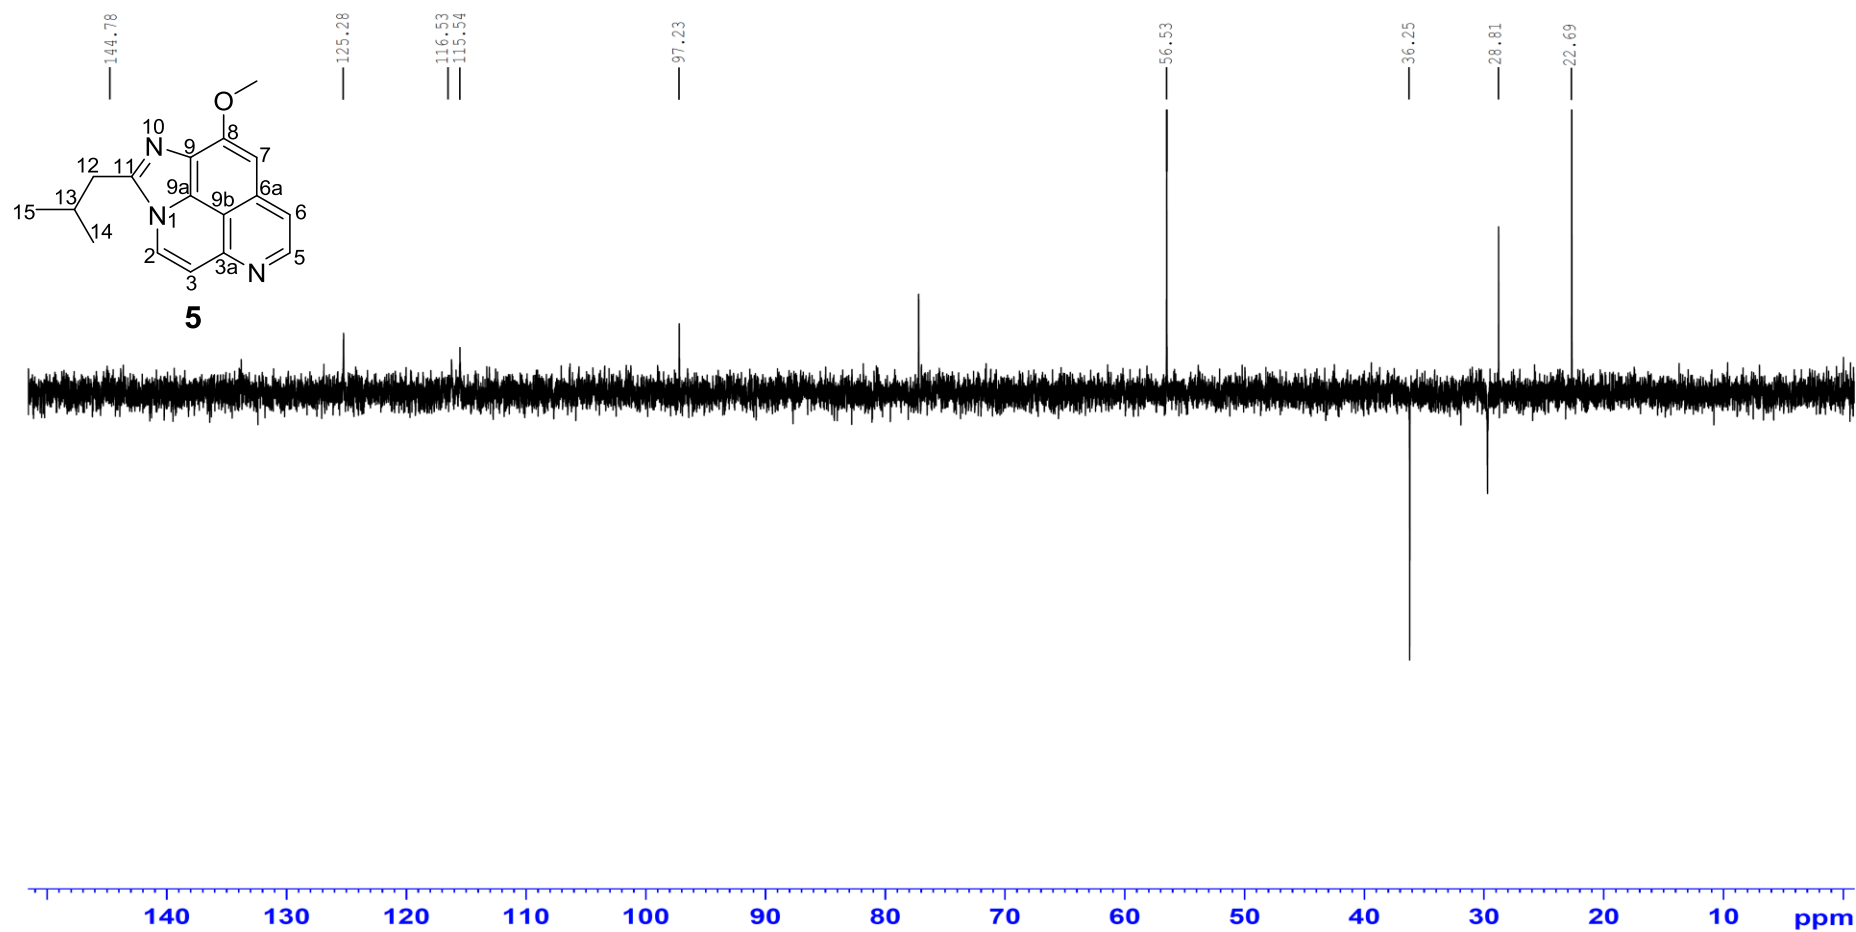

Figure S44. HSQC spectrum of compound **5** in CDCl<sub>3</sub>.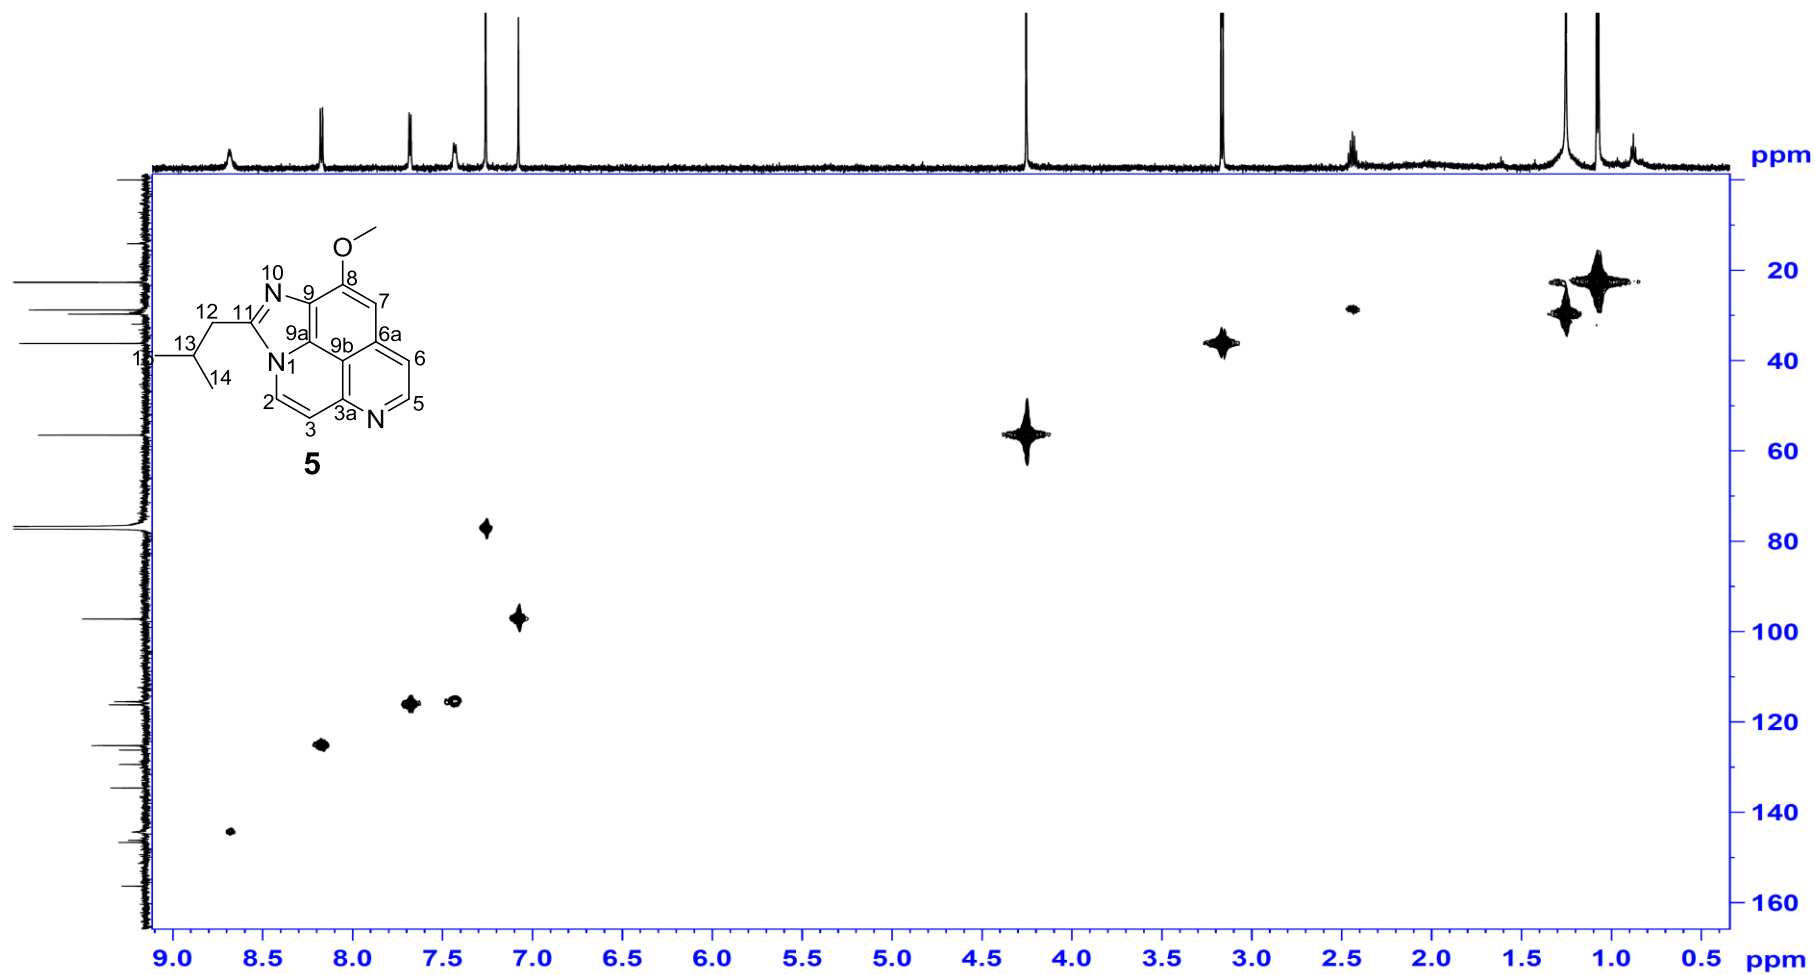

Figure S45. HMBC spectrum of compound **5** in CDCl<sub>3</sub>.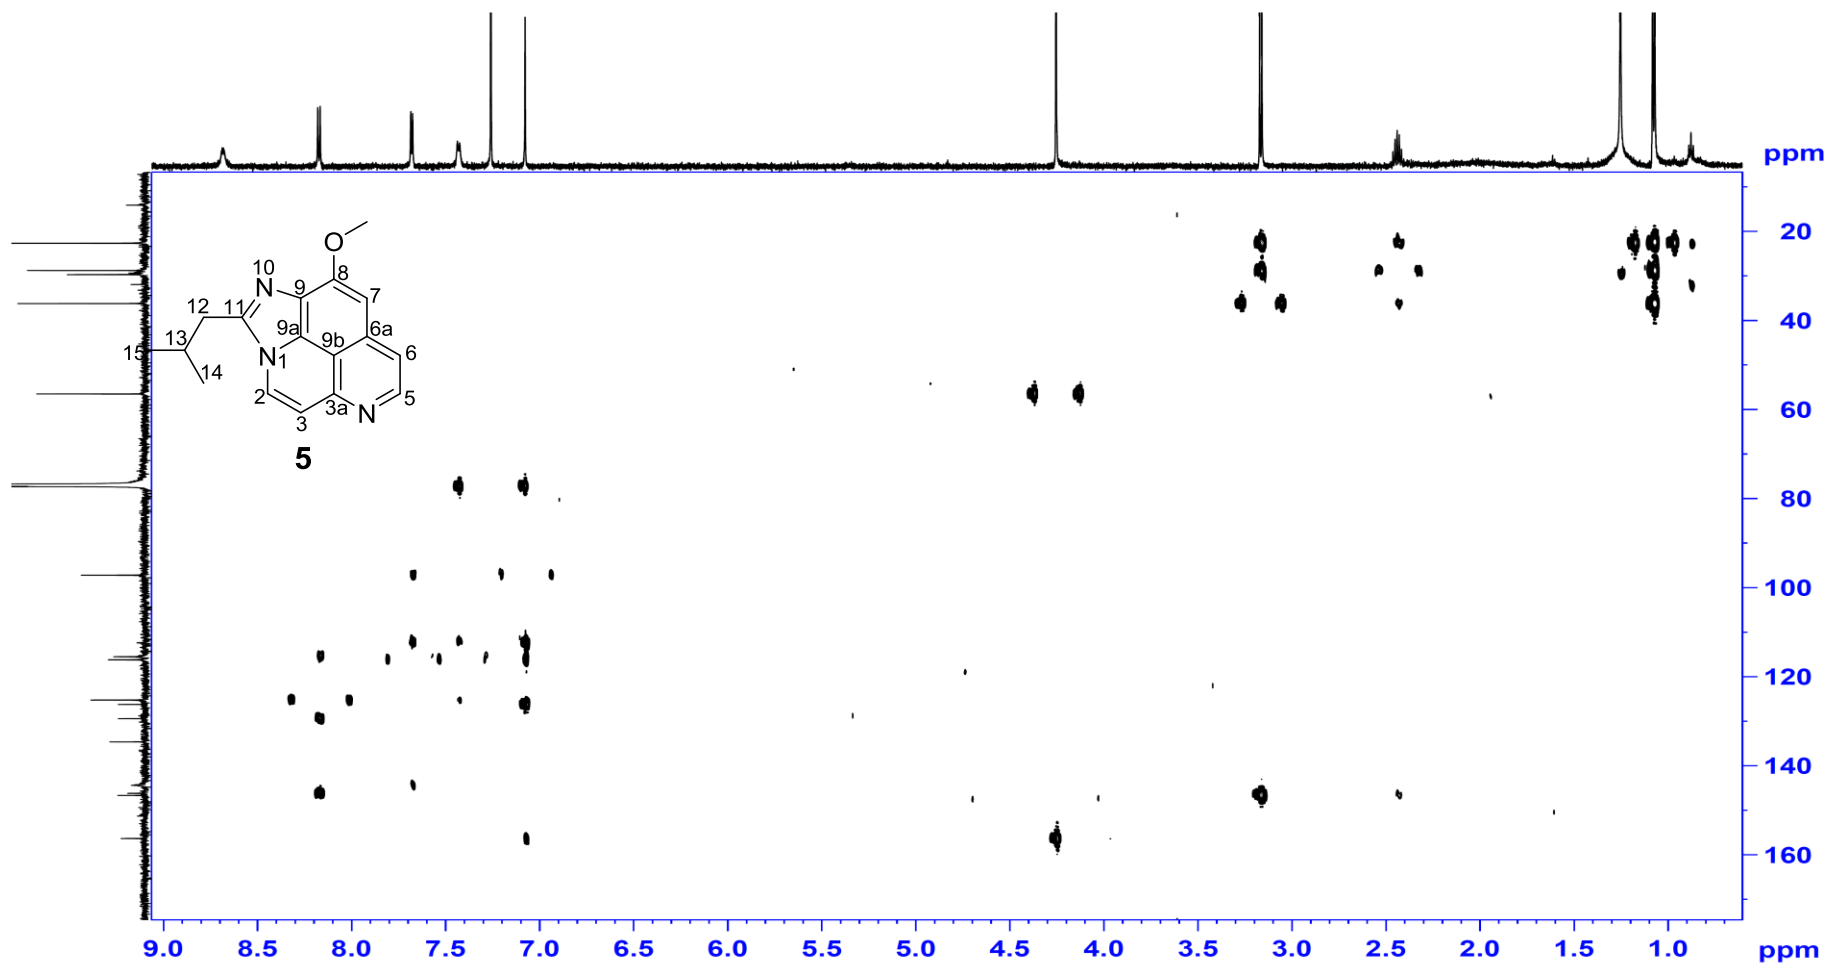

**Figure S46.**  $^1\text{H}$ - $^1\text{H}$  COSY spectrum of compound **5** in  $\text{CDCl}_3$ .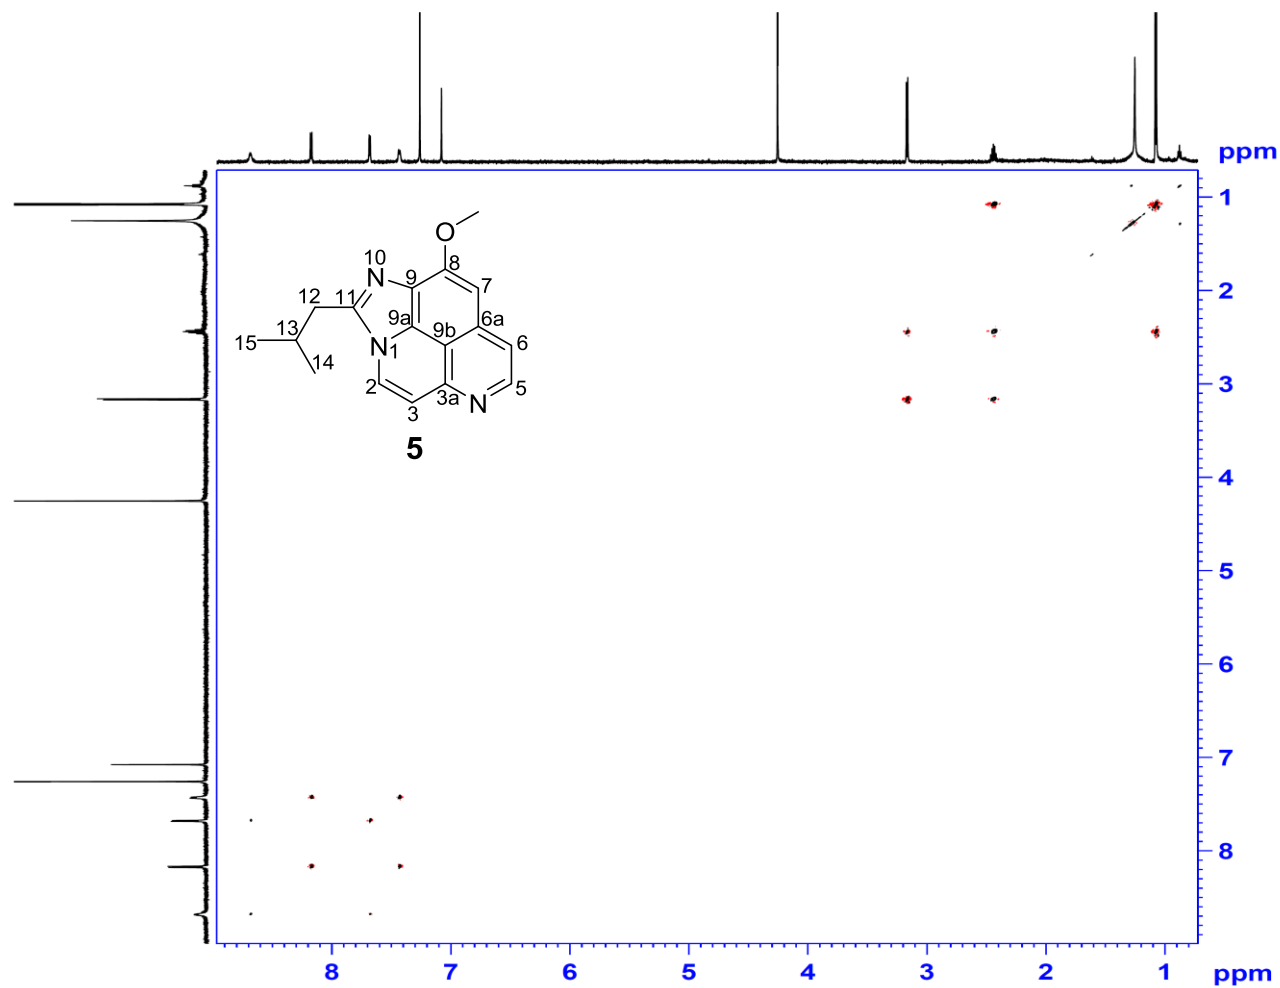

**Figure S47.** NOESY spectrum of compound **5** in CDCl<sub>3</sub>.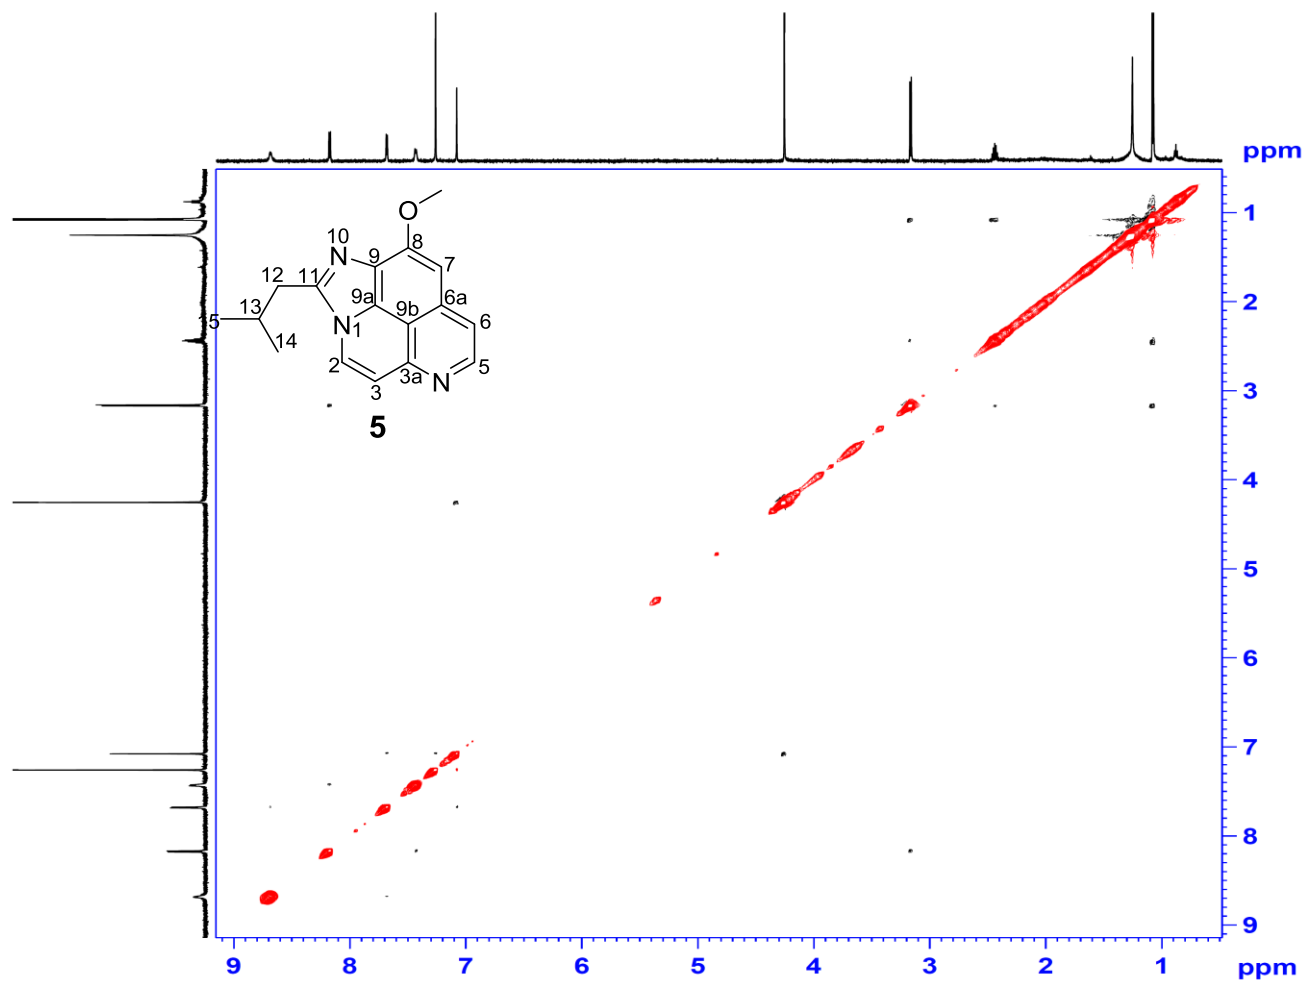

Figure S48. IR spectrum of compound 5.

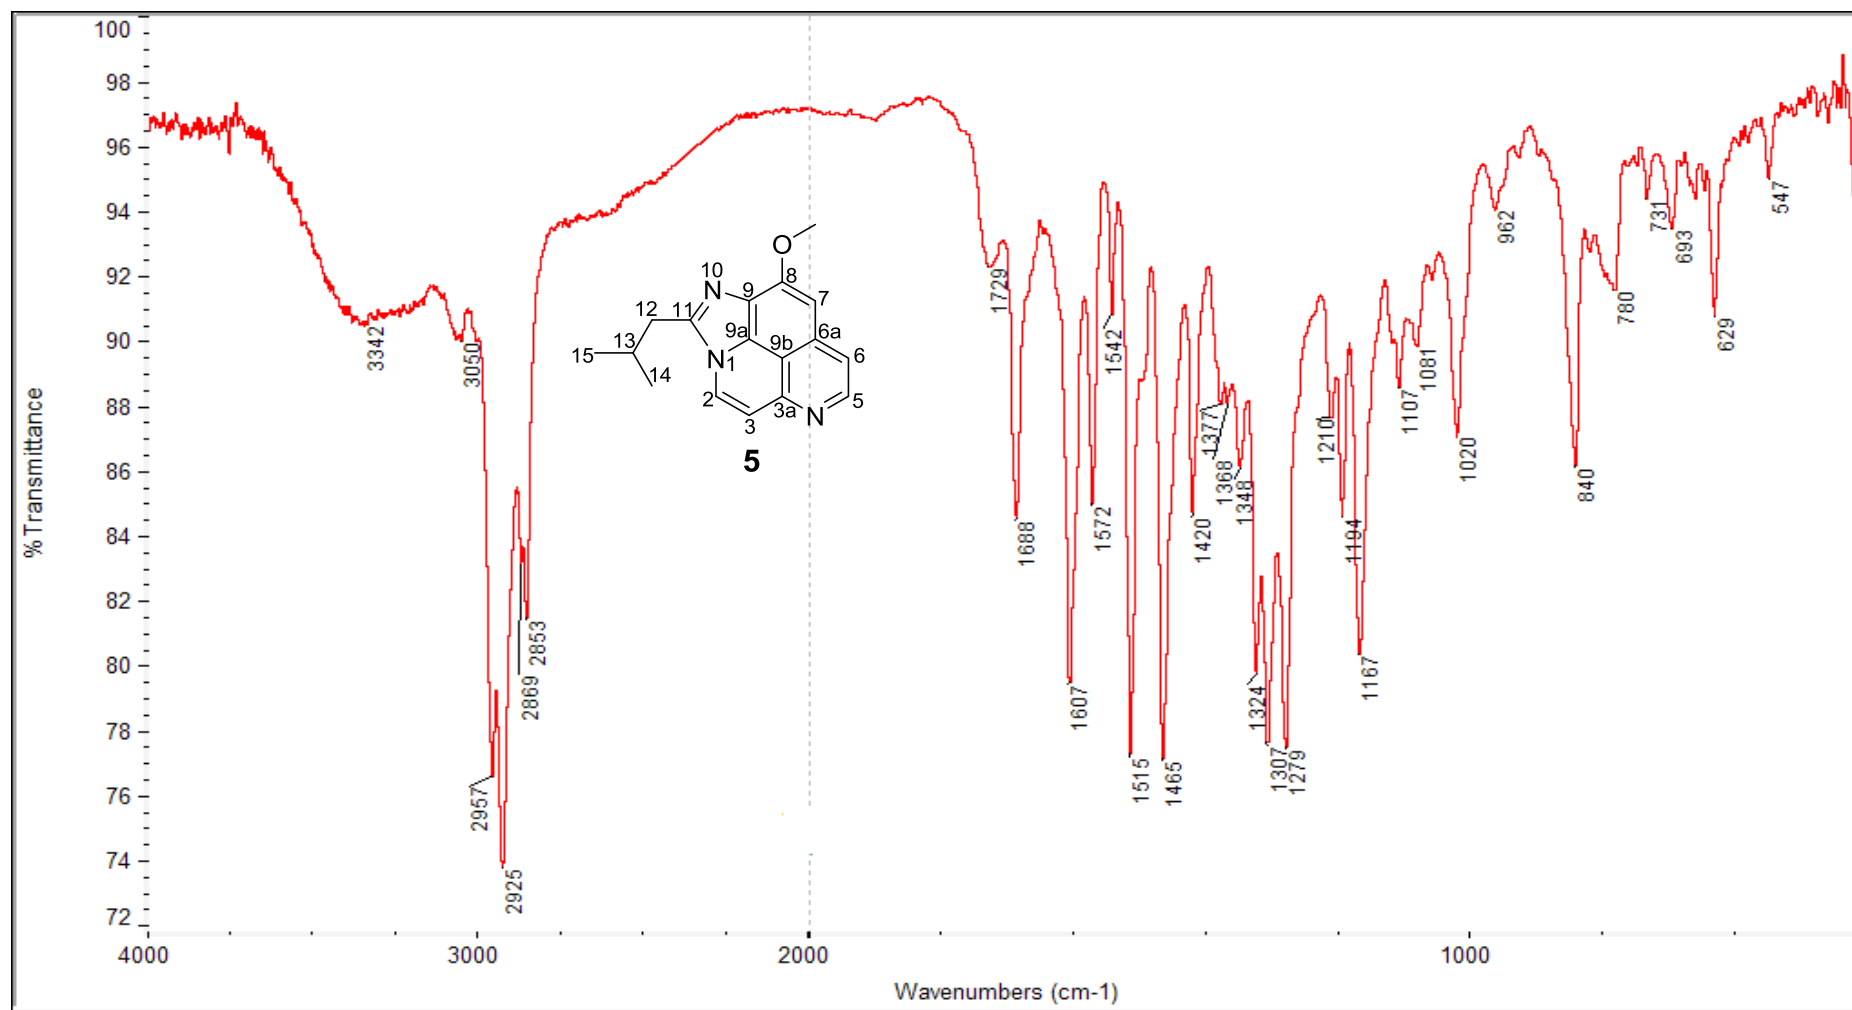

Figure S49. HRESIMS of compound 5.

## Elemental Composition Report

Page 1

Tolerance = 3.0 PPM / DBE: min = -1.5, max = 50.0  
Selected filters: None

Monoisotopic Mass, Even Electron Ions

5 formula(e) evaluated with 1 results within limits (up to 50 closest results for each mass)

Elements Used:

C: 5-20 H: 5-20 N: 1-3 O: 1-1

SIPI

M.W.=279

Q-ToF micro

03-Jan-2014,14:41:48

YA019

WQ14-004H 23 (0.794) AM (Cen,4, 80.00, Ar,5000.0,268.14,0.70); Sm (Mn, 2x3.00); Cm (23:38)

TOF MS ES+  
3.93e4

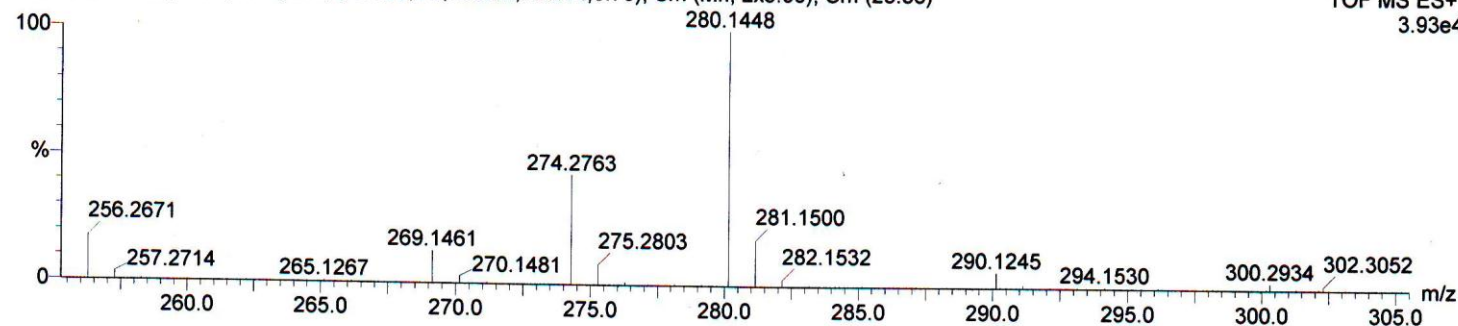

Minimum: 85.00  
Maximum: 100.00

| Mass     | RA     | Calc. Mass | mDa  | PPM  | DBE  | i-FIT | Formula      |
|----------|--------|------------|------|------|------|-------|--------------|
| 280.1448 | 100.00 | 280.1450   | -0.2 | -0.7 | 10.5 | 64.9  | C17 H18 N3 O |

**Figure S50.** UV spectrum of compound **5**.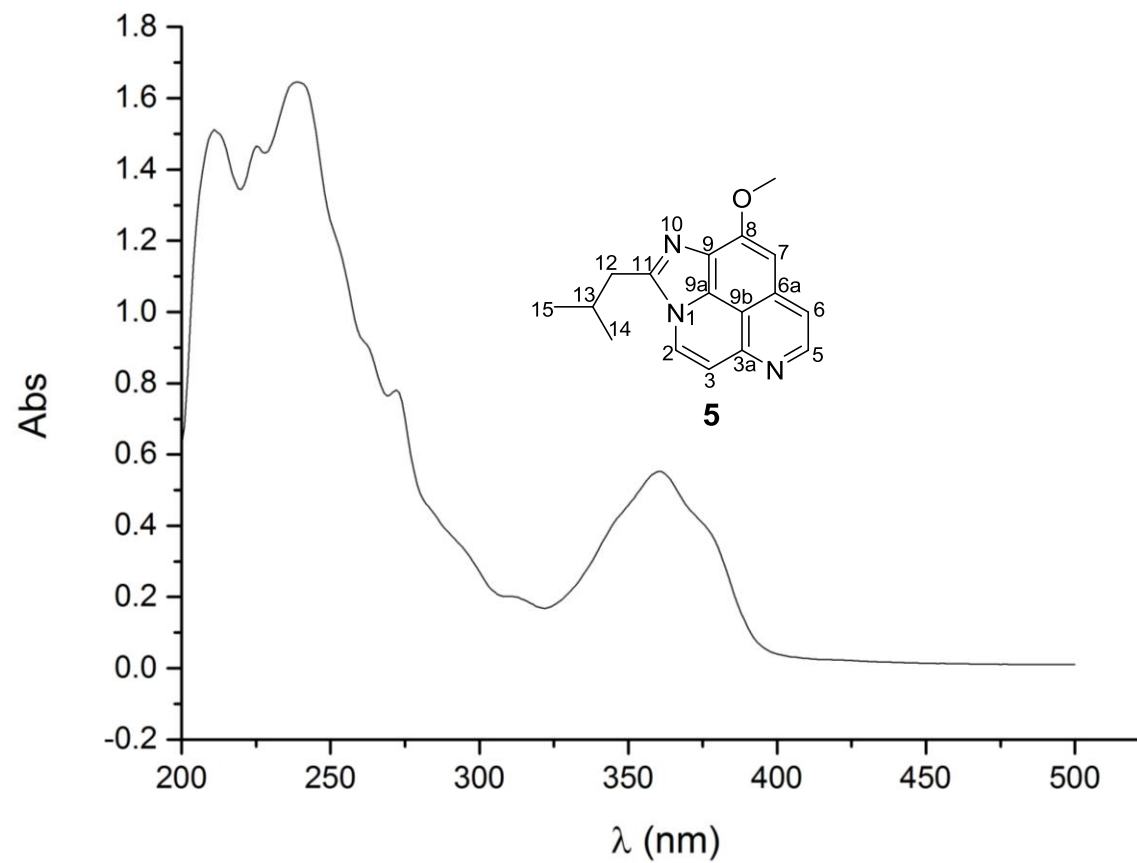

**Figure S51.**  $^1\text{H}$  NMR spectrum of compound **6** in  $\text{CDCl}_3$ .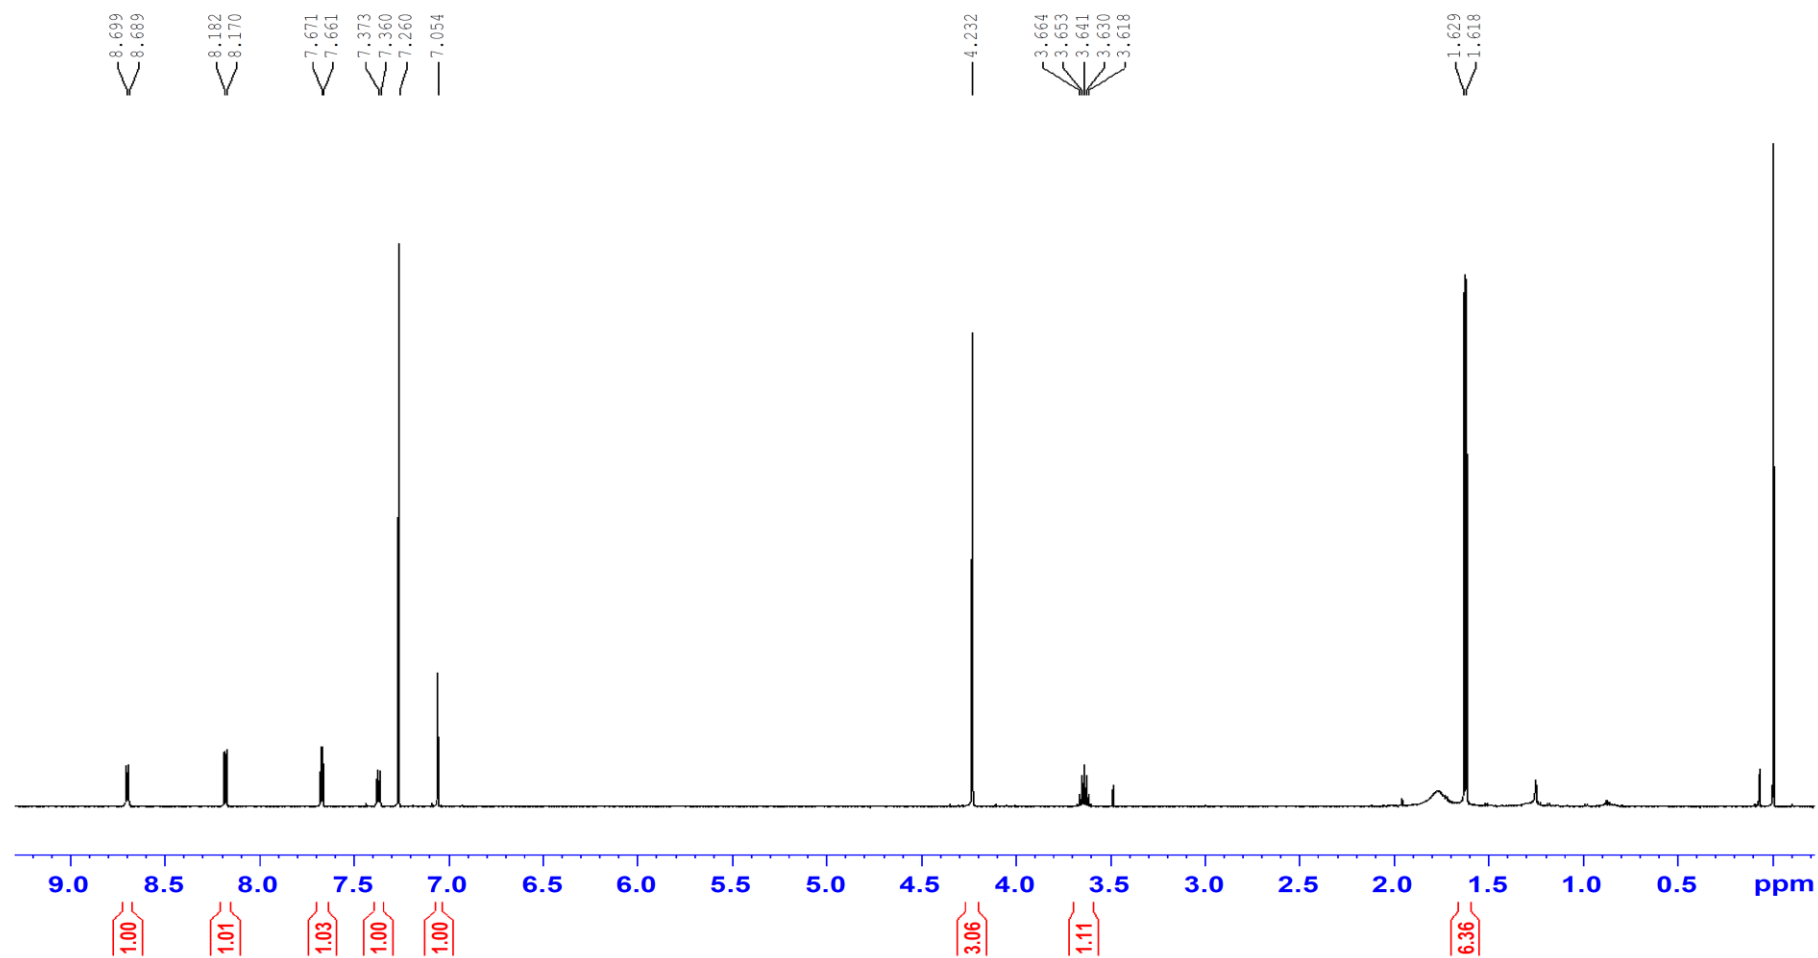

**Figure S52.**  $^{13}\text{C}$  NMR spectrum of compound **6** in  $\text{CDCl}_3$ .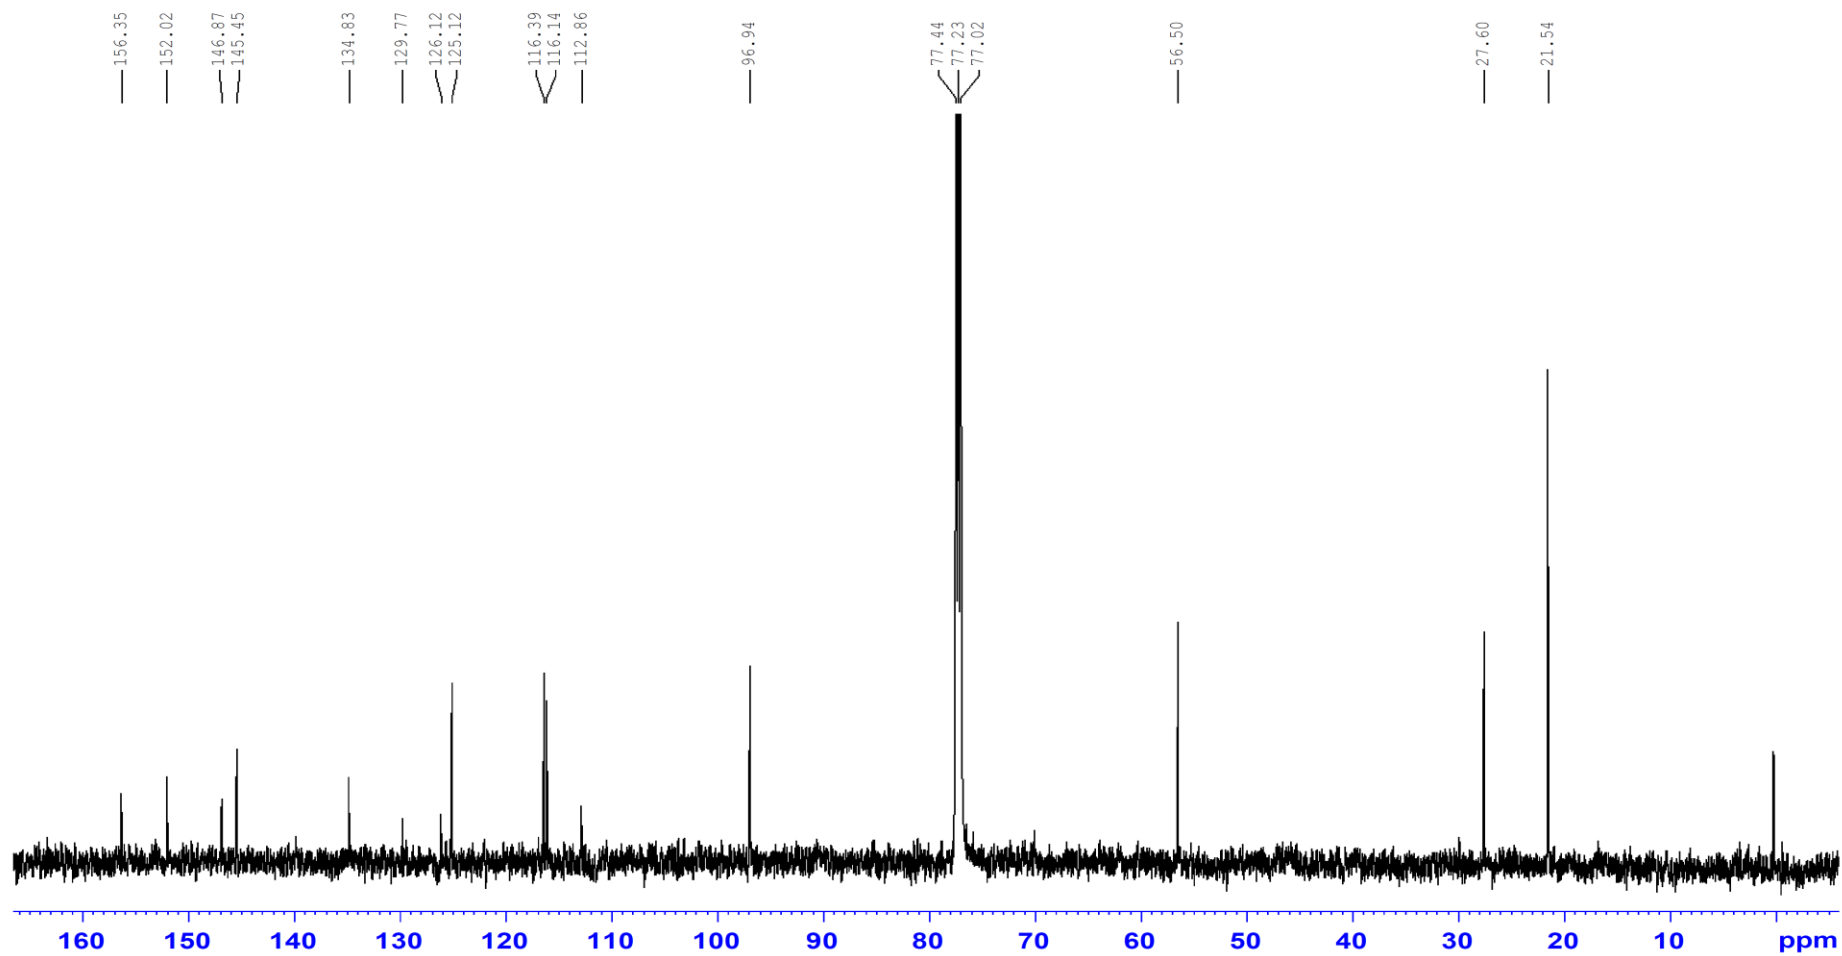

**Figure S53.**  $^1\text{H}$  NMR spectrum of compound **7** in  $\text{CDCl}_3$ .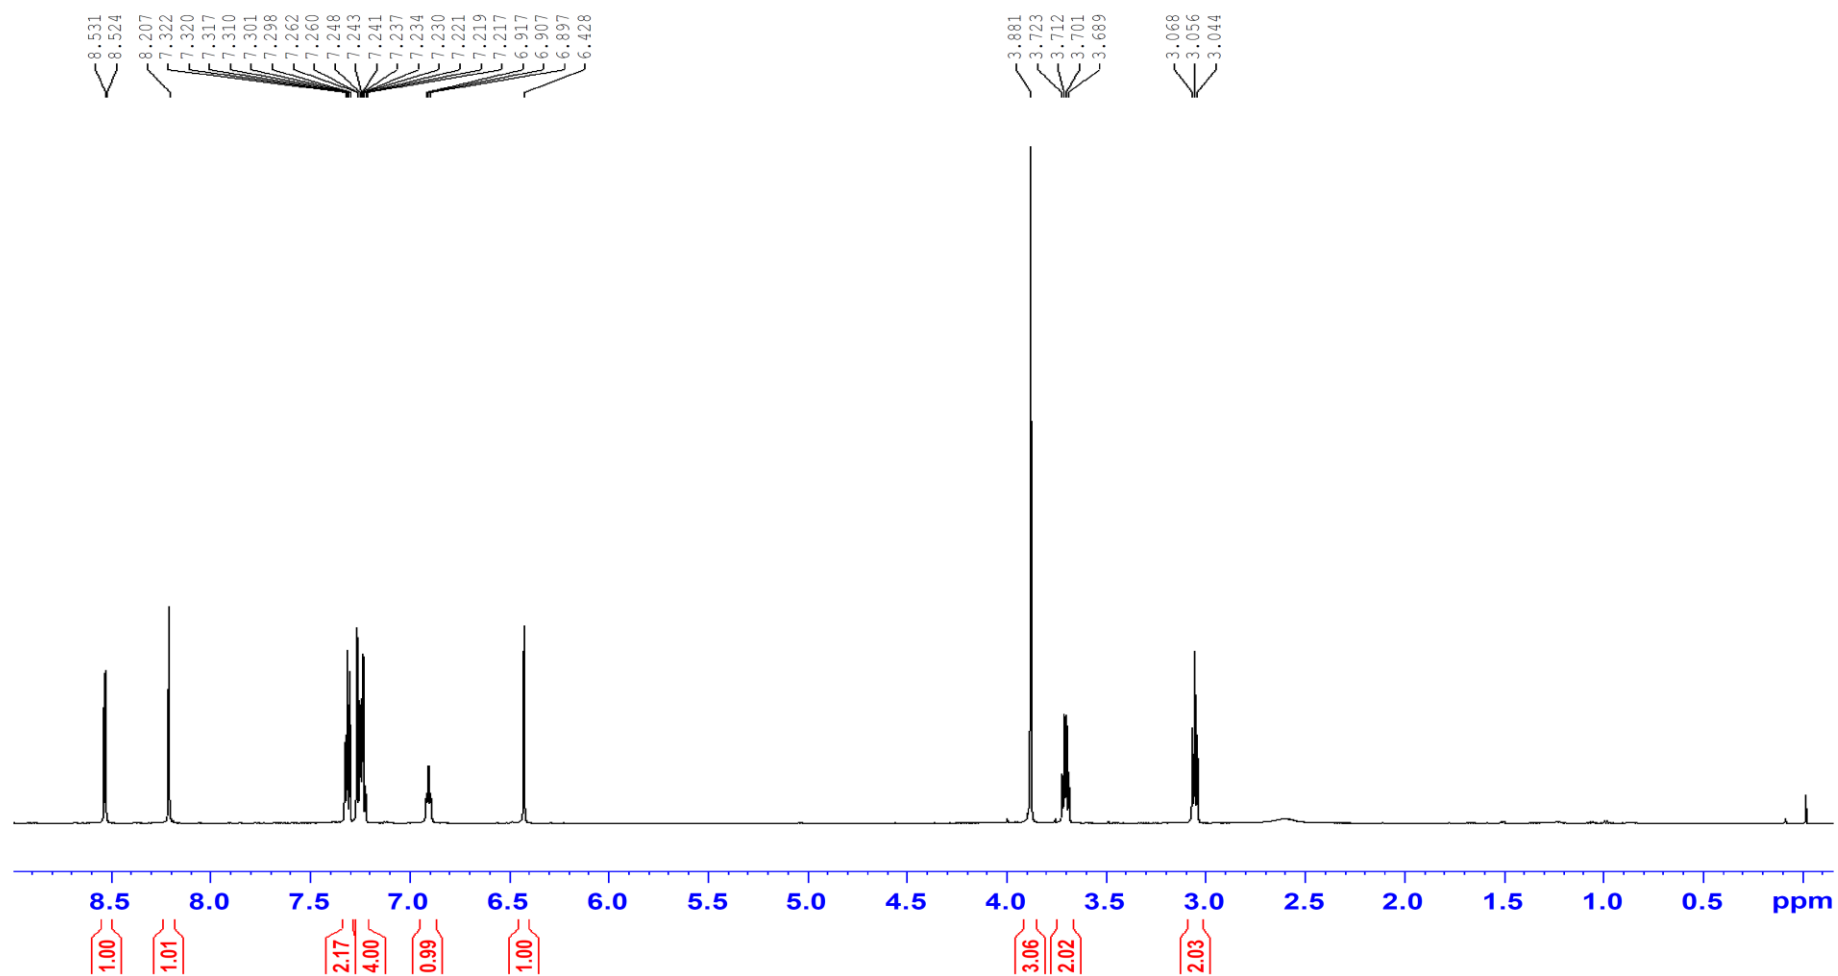

**Figure S54.**  $^{13}\text{C}$  NMR spectrum of compound **7** in  $\text{CDCl}_3$ .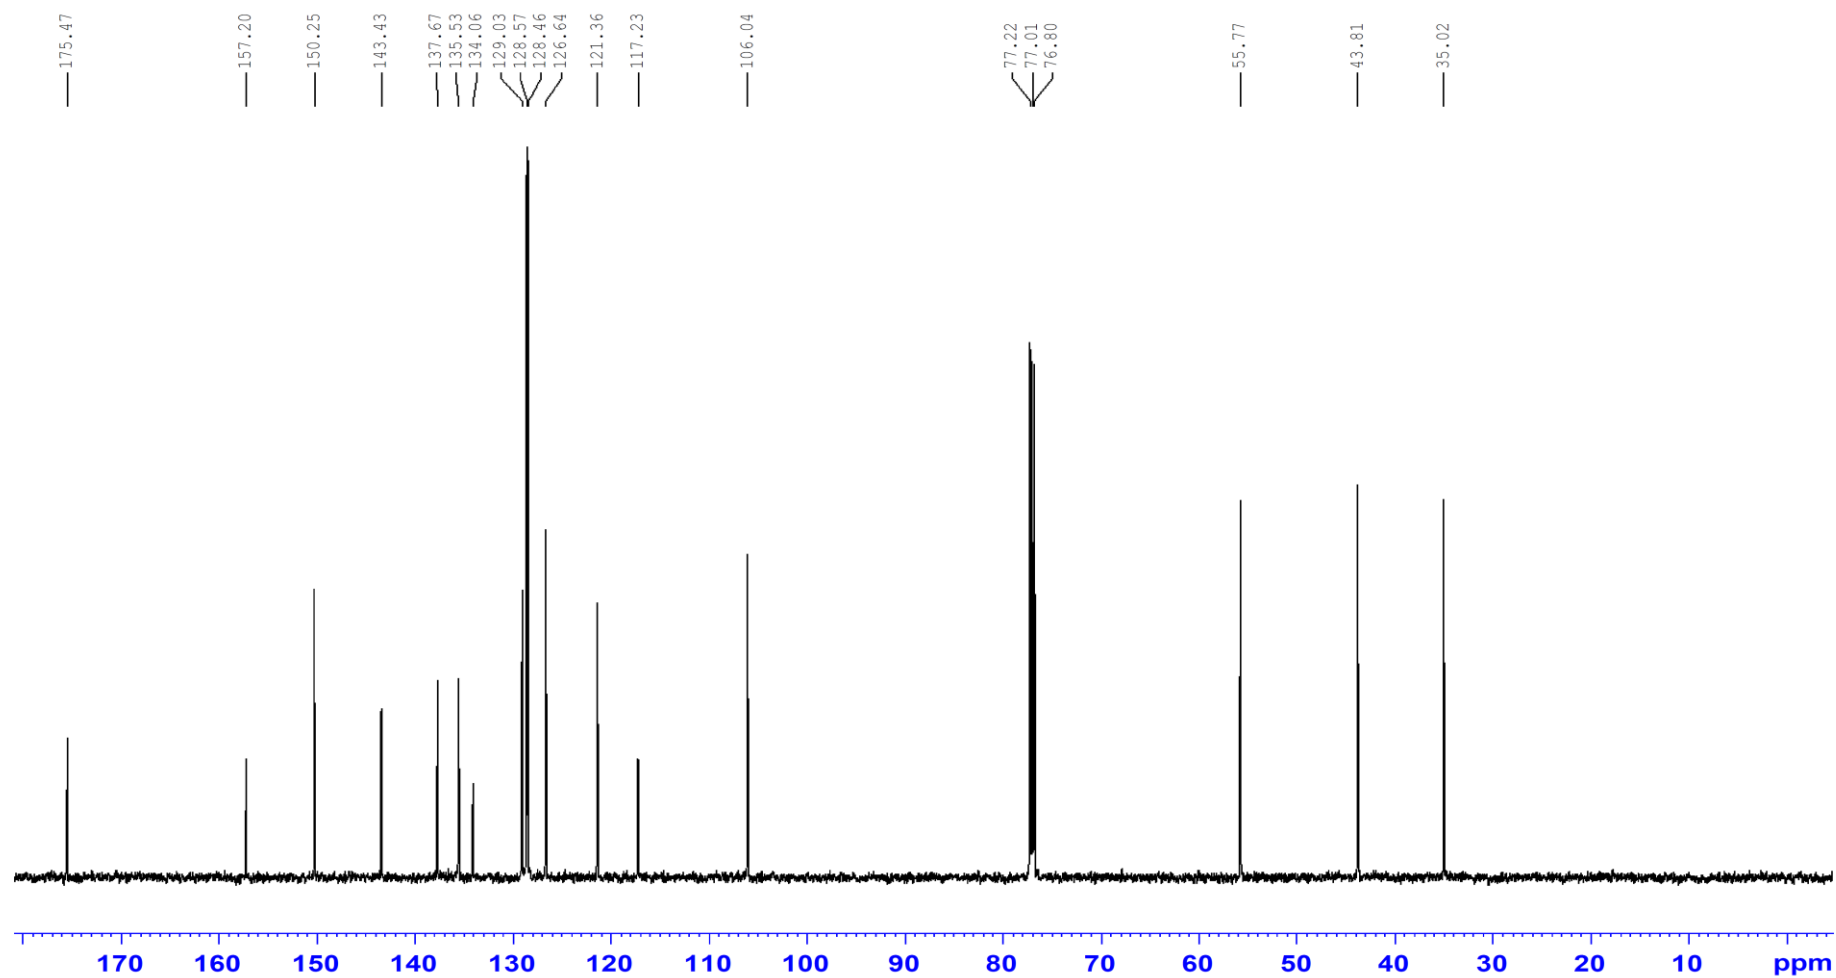

Figure S55.  $^1\text{H}$  NMR spectrum of compound **8** in  $\text{CDCl}_3$ .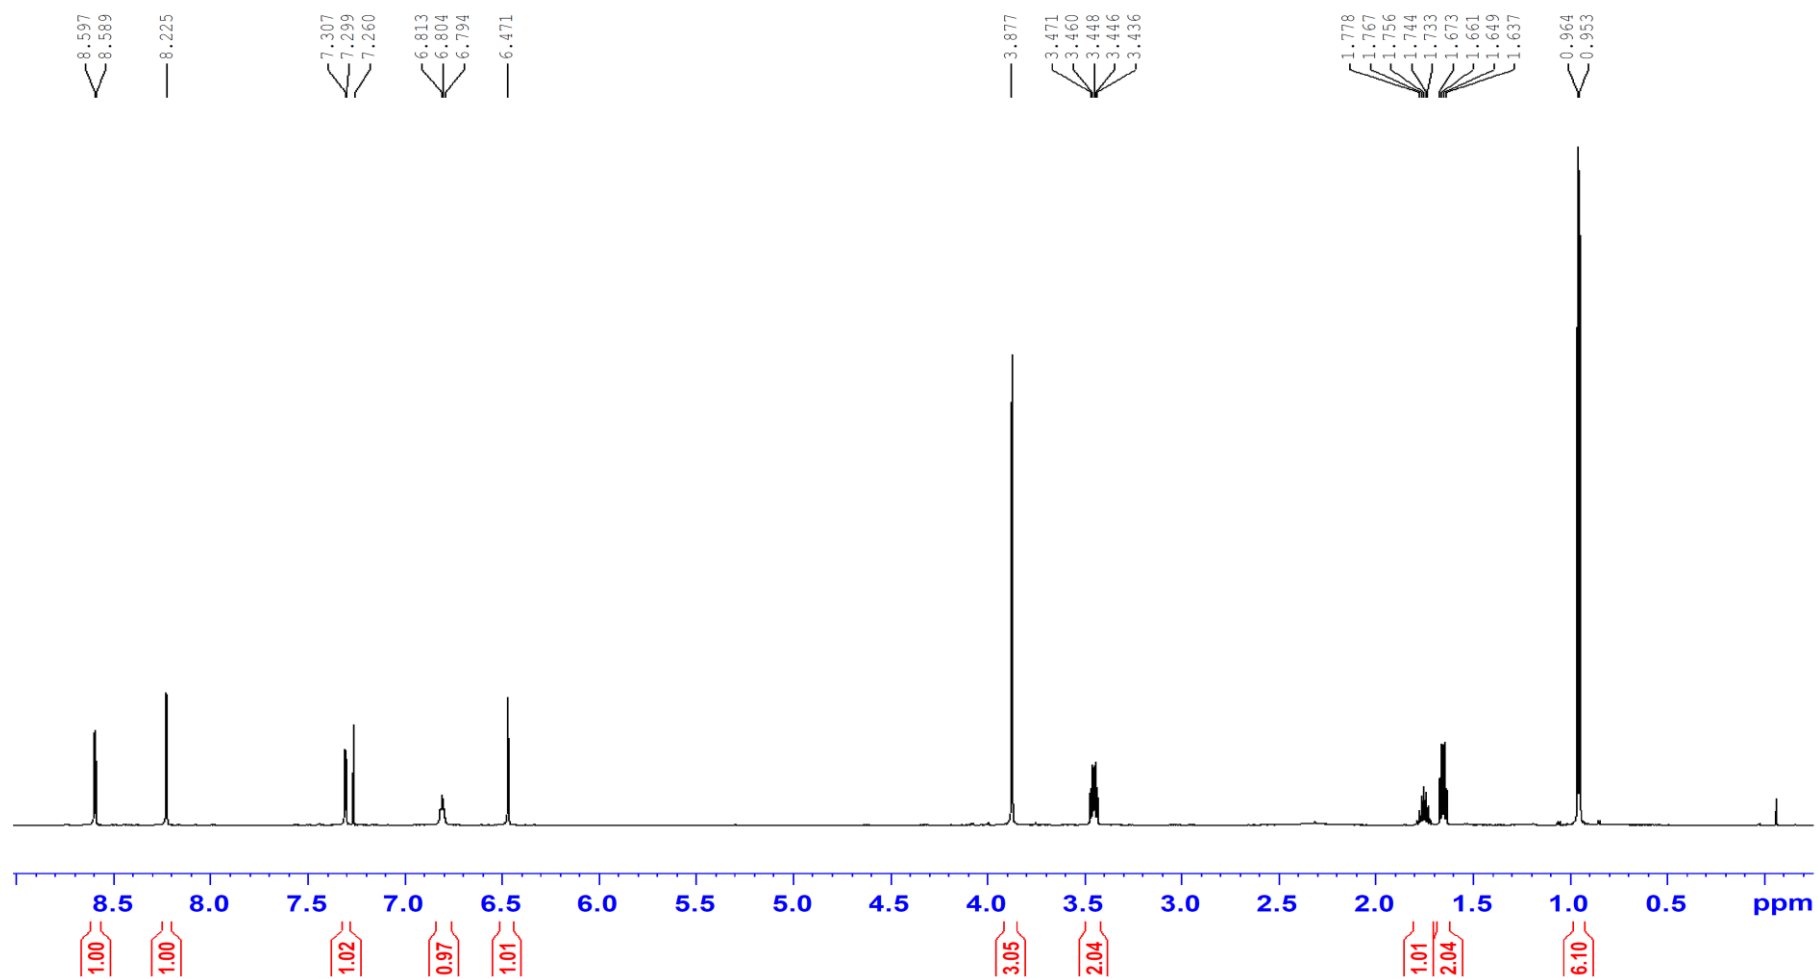

**Figure S56.**  $^{13}\text{C}$  NMR spectrum of compound **8** in  $\text{CDCl}_3$ .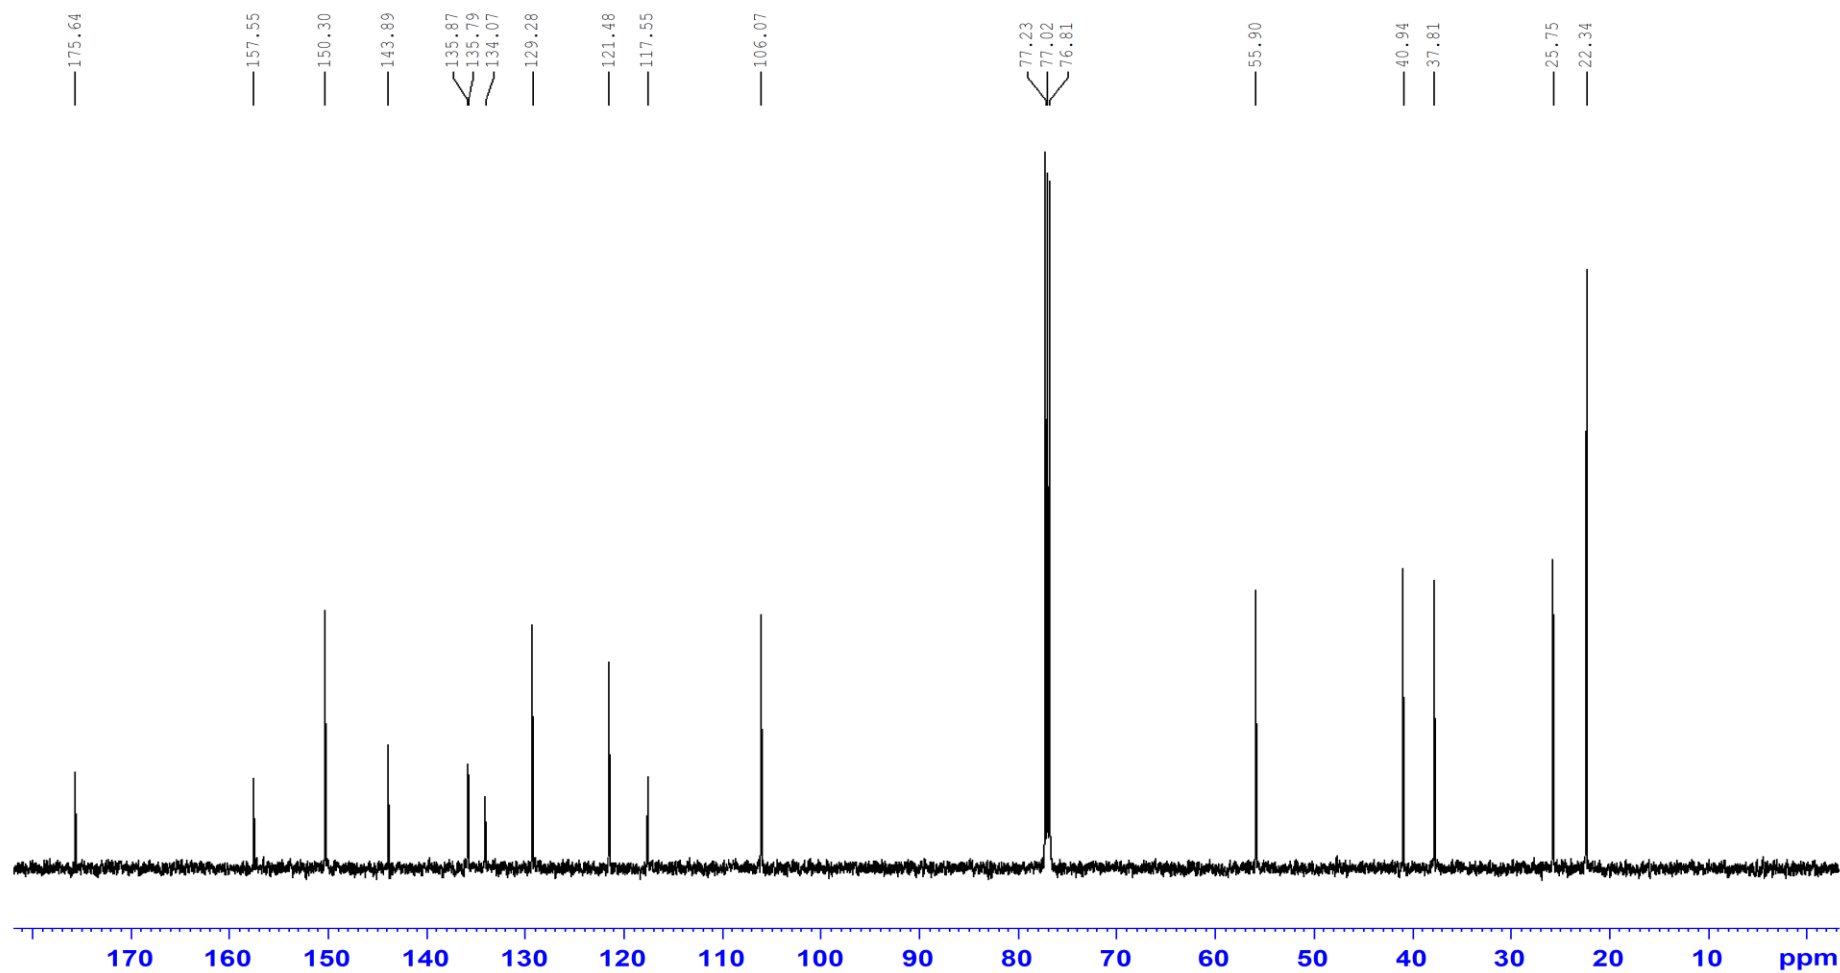

Table S1. NMR Spectroscopic Data for Compounds 6–8 in CDCl<sub>3</sub>.

| Position           | 6 <sup>a</sup>        |                              | 7 <sup>a</sup>        |                              | 8 <sup>a</sup>        |                              |
|--------------------|-----------------------|------------------------------|-----------------------|------------------------------|-----------------------|------------------------------|
|                    | $\delta_C$            | $\delta_H$ , mult. (J in Hz) | $\delta_C$            | $\delta_H$ , mult. (J in Hz) | $\delta_C$            | $\delta_H$ , mult. (J in Hz) |
| 2                  | 125.1, CH             | 8.69, d, (6.0)               | 129.0, CH             | 8.21, s                      | 129.3, CH             | 8.22, s                      |
| 3                  | 116.1, CH             | 7.37, d, (7.2)               | 143.4, qC             |                              | 143.9, qC             |                              |
| 3a                 | 146.9, qC             |                              | 135.5, qC             |                              | 135.8, qC             |                              |
| 5                  | 145.4, CH             | 8.17, d, (7.2)               | 150.3, CH             | 8.53, d, (4.2)               | 150.3, CH             | 8.59, d, (4.2)               |
| 6                  | 116.4, CH             | 7.67, d, (6.0)               | 121.4, CH             | 7.32, d, (4.2)               | 121.5, CH             | 7.30, d, (4.2)               |
| 6a                 | 134.8, qC             |                              | 135.5, qC             |                              | 135.8, qC             |                              |
| 7                  | 96.9, CH              | 7.05, s                      | 106.1, CH             | 6.43, s                      | 106.1, CH             | 6.47, s                      |
| 8                  | 156.4, qC             |                              | 157.2, qC             |                              | 157.6, qC             |                              |
| 9                  | 126.1, qC             |                              | 175.5, qC             |                              | 175.6, qC             |                              |
| 9a                 | 129.8, qC             |                              | 134.1, qC             |                              | 134.1, qC             |                              |
| 9b                 | 112.9, qC             |                              | 117.2, qC             |                              | 117.6, qC             |                              |
| 8-OCH <sub>3</sub> | 56.5, CH <sub>3</sub> | 4.23, s                      | 55.8, CH <sub>3</sub> | 3.88, s                      | 55.9, CH <sub>3</sub> | 3.88, s                      |
| 11                 | 152.0, qC             |                              |                       |                              |                       |                              |
| 12                 | 27.6, CH              | 3.64, m                      |                       |                              |                       |                              |
| 13                 | 21.5, CH <sub>3</sub> | 1.62, d, (7.2)               |                       |                              |                       |                              |
| 14                 | 21.5, CH <sub>3</sub> | 1.62, d, (7.2)               |                       |                              |                       |                              |
| 1'                 |                       |                              |                       | 6.91, t, (6.0)               |                       | 6.80, t, (6.0)               |
| 2'                 |                       |                              | 43.8, CH <sub>2</sub> | 3.70, q, (13.8, 7.2)         | 40.9, CH <sub>2</sub> | 3.45, m                      |
| 3'                 |                       |                              | 35.0, CH <sub>2</sub> | 3.06, t, (7.2)               | 37.8, CH <sub>2</sub> | 1.65, q, (13.0, 7.2)         |
| 4'                 |                       |                              | 137.7, qC             |                              | 25.8, CH              | 1.75, m                      |
| 5'                 |                       |                              | 128.5, CH             | 7.23, m                      | 22.3, CH <sub>3</sub> | 0.96, d, (6.6)               |
| 6'                 |                       |                              | 128.6, CH             | 7.30, m                      | 22.3, CH <sub>3</sub> | 0.96, d, (6.6)               |
| 7'                 |                       |                              | 126.6, CH             | 7.23, m                      |                       |                              |
| 8'                 |                       |                              | 128.6, CH             | 7.30, m                      |                       |                              |
| 9'                 |                       |                              | 128.5, CH             | 7.23, m                      |                       |                              |

<sup>a</sup> Measured at 600 MHz (<sup>1</sup>H) and 150 MHz (<sup>13</sup>C).
